# Supplementary material for: Global-scale population genetic analysis of Plasmodium falciparum identifies country- and region-specific patterns of malaria parasite adaptation
Source: Research Square preprint supplement (doi:10.21203/rs.3.rs-7160640/v1), 2025-08-18
Supplement: Supplementary file 1 [file 5c44b67883c16a5024216b08.xlsx]

## Sheet: Supplementary Tables Key
Global-scale population genetic analysis of Plasmodium falciparum identifies country- and region-specific patterns of malaria parasite adaptation
Nina Billows1			nina.billows@lshtm.ac.uk
Jamille G. Dombrowski2		jamille.dombrowski@gmail.com
Joseph Thorpe1			Joseph.Thorpe@lshtm.ac.uk
Leen Vanheer1			Leen.Vanheer@lshtm.ac.uk
Sophie Moss1			Sophie.Moss@lshtm.ac.uk
Jesse Gitaka4			jgitaka@mku.ac.ke
Colin J. Sutherland1,5		colin.sutherland@lshtm.ac.uk
Claudio R. F. Marinho2		marinho@usp.br
Nguyen Thi Hong Ngoc 6		ngocnimpe@gmail.com
Nguyen Thi Huong Binh6	nguyenhuongbinh74@gmail.com
Nguyen Quang Thieu6		thieunq@gmail.com
Susana Campino 1,*		Susana.campino@lshtm.ac.uk
Taane G. Clark 1,7,*		taane.clark@lshtm.ac.uk
1 Faculty of Infectious and Tropical Diseases, London School of Hygiene and Tropical Medicine, London, United Kingdom
2 Department of Parasitology, Institute of Biomedical Sciences, University of São Paulo, São Paulo, Brazil.
3 School of Medicine, Instituto de Medicina Tropical, University of São Paulo, São Paulo, Brazil.
4 Directorate of Research and Innovation, Mount Kenya University, Gen. Kago Rd, Thika, Kenya.
5 UK Health Security Agency Malaria Reference Laboratory, LSHTM, London, WC1E 7HT, UK.
6 Molecular Biology Department, Parasitology and Entomology, Vietnam National Institute of Malariology, Hanoi, Vietnam.
7 Faculty of Epidemiology and Population Health, London School of Hygiene and Tropical Medicine, London, United Kingdom
SUPPLEMENTARY TABLES
Table S1	Supplementary Table 1. Number of samples (N=17,565) by geographic location
Table S2	Supplementary Table 2. Fws scores per country and year group (category)
Table S3	Supplementary Table 3. Chromosomal regions with high IBD fractions (95% quartile) and their corresponding genes and gene products
Table S4	Supplementary Table 4. Gene Ontology Enrichment for biological processes, cellular components and molecular functions for genes with high IBD fractions
Table S5	Supplementary Table 5. Single nucleotide polymorphisms with moderate-high FST (>0.75) for pairwise regional comparisons (MAF>0.1)
Table S6	Supplementary Table 6. Gene Ontology analysis for biological processes, cellular components and molecular functions for genes with FST scores (pairwise comparisons)
Table S7	Supplementary Table 7. Single nucleotide polymorphisms with moderate-high FST (>0.75) for pairwise country-level comparisons
Table S8	Supplementary Table 8. Single nucleotide polymorphisms with moderate-high FST (>0.75) for each region ("one-against-all")
Table S9	Supplementary Table 9. Single nucleotide polymorphisms with moderate-high FST (>0.75) for each country ("one-against-all")
Table S10	Supplementary Table 10. Single nucleotide polymorphisms with iHS scores >5 across 9 regions
Table S11	Supplementary Table 11. Chromosomal regions with high iHS scores and their corresponding genes and gene products
Table S12	Supplementary Table 12. Single nucleotide polymorphisms with XP-EHH scores >5.0 across paired regions
Table S13	Supplementary Table 13. Gene Ontology Enrichment for biological processes, cellular components and molecular functions for genes undergoing cross-population selection (XP-EHH)
Table S14	Supplementary Table 14. Chromosomal regions with high XP-EHH scores and their corresponding genes and gene products
Table S15	Supplementary Table 15. Genes with high iR (-log10 P-value>5) across countries and time
Table S16	Supplementary Table 16. pfkelch13 C580Y interaction candidates (co-occurrence and association)
Table S17	Supplementary Table 17. Metadata for global P.falciparum dataset
Table S18	Supplementary Table 18. Highly variable regions excluded in selection analysis
Table S19	Supplementary Table 19. Prioritised Kelch13 interaction candidate gene IDs

## Sheet: Table S1
Supplementary Table 1. Number of samples (N=17,565) by geographic location
Region	N	%	Country	N	%
Central Africa	514	0.0293	Democratic Rep. of the Congo	514	0.0293
East Africa	1604	0.0913	Kenya	669	0.0380871
			Tanzania	529	0.0301
			Malawi	264	0.015
			Mozambique	105	0.0059778
			Madagascar	22	0.0013
			Uganda	12	0.0007
Horn of Africa	92	0.0052	Sudan	71	0.004
			Ethiopia	21	0.0012
Oceania	343	0.0195	Papua New Guinea	221	0.0126
			Indonesia	122	0.0069
South America	1562	0.0889	Brazil	61	0.0035
			Colombia	135	0.0077
			Ecuador	30	0.0017
			French Guiana	21	0.0012
			Guyana	1292	0.0735
			Peru	21	0.0012
			Venezuela	2	0.0001
South Asia	1554	0.0884	Bangladesh	1255	0.0714
			India	299	0.017
Sth Central Africa	255	0.0145	Zambia	255	0.0145
Southeast Asia	5790	0.3295	Cambodia	1260	0.0717
			Vietnam	1292	0.0735
			Thailand	947	0.0539
			Laos	852	0.0485
			Myanmar	844	0.048
			Cambodia/ Thailanda	595	0.0339
West Africa	5857	0.3333	Ghana	2845	0.1619
			Mali	958	0.0545
			The Gambia	760	0.0433
			Senegal	359	0.0204
			Cameroon	258	0.0147
			Guinea	151	0.0086
			Benin	148	0.0084
			Nigeria	97	0.0055
			Mauritania	90	0.0051
			Côte d'Ivoire	71	0.004
			Burkina Faso	57	0.0032
			Gabon	55	0.0032
			Guinea Bissau	5	<0.1%

## Sheet: Table S2
Supplementary Table 2. Fws scores per country and year group (category)
Category	Mean Fws	Median Fws	Minimum Fws	Maximum Fws	IQR
Bangladesh 2008-2011	0.855166	0.894336	0.453241	0.995113	0.211907
Bangladesh 2012-2015	0.890557	0.968039	0.405726	0.99637	0.162424
Bangladesh 2016-2019	0.906021	0.972564	0.446077	0.997314	0.127286
Benin 2012-2015	0.897645	0.980716	0.437559	0.993646	0.178883
Benin 2016-2019	0.880278	0.958527	0.441981	0.990494	0.191991
Burkina Faso 2008-2011	0.763503	0.751178	0.414627	0.995408	0.356773
Cambodia 2004-2007	0.958206	0.988586	0.751976	0.996095	0.0106475
Cambodia 2008-2011	0.929663	0.982087	0.43633	0.996989	0.0862048
Cambodia 2012-2015	0.942729	0.980255	0.429387	0.994889	0.0278009
Cambodia 2016-2019	0.918722	0.976642	0.353607	0.997137	0.0868375
Cambodia Pre-2000	0.963183	0.961546	0.948369	0.979353	0.00850974
Cameroon 2012-2015	0.832069	0.9209	0.322057	0.99492	0.286896
Cameroon 2016-2019	0.841228	0.919676	0.427463	0.995145	0.222232
Colombia 2008-2011	0.982664	0.984235	0.966285	0.989014	0.00578614
Colombia 2012-2015	0.939071	0.957867	0.79956	0.970494	0.0232166
Colombia 2016-2019	0.922507	0.942592	0.384108	0.971701	0.0173627
Côte d'Ivoire 2012-2015	0.866091	0.948326	0.487063	0.995909	0.17798
Democratic Republic of the Congo 2012-2015	0.815249	0.886973	0.291705	0.99632	0.297258
Democratic Republic of the Congo 2016-2019	0.850767	0.944491	0.474923	0.98835	0.221475
Ecuador 2012-2015	0.956427	0.948382	0.928173	0.996005	0.0284071
Ethiopia 2012-2015	0.956499	0.966318	0.881038	0.991271	0.0487872
French Guiana 2000-2003	0.974562	0.980777	0.90224	0.992179	0.012702
French Guiana 2012-2015	0.870212	0.972096	0.515809	0.985989	0.206148
Gabon 2012-2015	0.870345	0.964053	0.416131	0.991286	0.182737
Gambia 2000-2003	0.861893	0.973055	0.525591	0.99222	0.230882
Gambia 2008-2011	0.923093	0.977738	0.467162	0.996173	0.0536797
Gambia 2012-2015	0.901212	0.971218	0.382528	0.997873	0.128253
Gambia 2016-2019	0.916396	0.965606	0.429449	0.997764	0.114648
Gambia Pre-2000	0.709922	0.736964	0.253037	0.99742	0.390253
Ghana 2008-2011	0.781972	0.857863	0.288141	0.996485	0.375739
Ghana 2012-2015	0.808519	0.876052	0.23175	0.997761	0.315173
Ghana 2016-2019	0.830327	0.893071	0.248841	0.997388	0.284603
Guinea 2008-2011	0.813067	0.921722	0.260446	0.996062	0.282023
Guinea Bissau 2016-2019	0.967917	0.973648	0.924147	0.991702	0.0140382
Guyana 2016-2019	0.956168	0.984598	0.55626	0.99699	0.0175439
Guyana 2020-2021	0.943805	0.982113	0.448226	0.994443	0.0282368
India 2016-2019	0.894995	0.968367	0.497768	0.997675	0.177278
Indonesia 2008-2011	0.932387	0.973986	0.672151	0.994507	0.0234941
Indonesia 2012-2015	0.90467	0.959219	0.440586	0.991087	0.0912296
Indonesia 2016-2019	0.926331	0.955011	0.669265	0.983561	0.046679
Kenya 2000-2003	0.762079	0.669108	0.555044	0.976245	0.272196
Kenya 2004-2007	0.881415	0.973919	0.432865	0.995777	0.193488
Kenya 2008-2011	0.885861	0.980585	0.363901	0.995481	0.188044
Kenya 2012-2015	0.851434	0.975015	0.255405	0.996057	0.260271
Kenya 2016-2019	0.83838	0.867671	0.48046	0.997495	0.263382
Kenya Pre-2000	0.763549	0.836583	0.299383	0.996126	0.344032
Laos 2008-2011	0.895029	0.970758	0.538074	0.995368	0.147279
Laos 2012-2015	0.956301	0.982211	0.679811	0.995927	0.0322121
Laos 2016-2019	0.954142	0.985504	0.487824	0.996632	0.0179389
Madagascar 2012-2015	0.940751	0.984103	0.598914	0.991276	0.0120189
Malawi 2008-2011	0.751675	0.782945	0.208763	0.996733	0.401963
Mali 2004-2007	0.816705	0.888444	0.327995	0.9961	0.337018
Mali 2012-2015	0.865825	0.958832	0.362287	0.998324	0.210109
Mali 2016-2019	0.85228	0.933227	0.33931	0.997627	0.239598
Mali 2020-2021	0.733081	0.73329	0.475459	0.989793	0.205125
Mauritania 2012-2015	0.882822	0.969788	0.562968	0.996052	0.191275
Mozambique 2012-2015	0.880575	0.964363	0.59922	0.993258	0.203911
Mozambique 2016-2019	0.873172	0.958305	0.426933	0.998454	0.222195
Myanmar 2008-2011	0.948514	0.982788	0.549954	0.992604	0.0239268
Myanmar 2012-2015	0.953007	0.983056	0.516064	0.996298	0.0207817
Myanmar 2016-2019	0.969049	0.980996	0.510738	0.996326	0.0184241
Nigeria 2012-2015	0.94613	0.983982	0.582897	0.994057	0.0240736
Nigeria 2016-2019	0.912978	0.975318	0.516903	0.998248	0.130368
Papua New Guinea 2008-2011	0.942555	0.972082	0.675666	0.992394	0.0282398
Papua New Guinea 2012-2015	0.942453	0.970152	0.548519	0.991803	0.0118199
Papua New Guinea 2016-2019	0.974568	0.991234	0.709584	0.997093	0.00935218
Peru 2008-2011	0.981507	0.98247	0.968343	0.994577	0.00801289
Senegal 2008-2011	0.95812	0.976398	0.812638	0.99259	0.00436476
Senegal 2012-2015	0.937287	0.978379	0.493285	0.996375	0.0300679
Sudan 2012-2015	0.945899	0.982144	0.643238	0.990492	0.0110539
Sudan 2016-2019	0.96052	0.992345	0.610893	0.99798	0.0155444
Tanzania 2008-2011	0.842003	0.953648	0.333673	0.996518	0.25808
Tanzania 2012-2015	0.859652	0.953707	0.316339	0.995819	0.233168
Thailand 2000-2003	0.908253	0.972444	0.434409	0.993959	0.0993745
Thailand 2004-2007	0.928089	0.974739	0.539695	0.995205	0.0813889
Thailand 2008-2011	0.926572	0.978187	0.396255	0.997103	0.0840783
Thailand 2012-2015	0.956153	0.984999	0.583564	0.997461	0.0185555
Thailand 2016-2019	0.918986	0.974466	0.466684	0.993602	0.0308488
Uganda 2008-2011	0.801699	0.872063	0.417755	0.980659	0.251023
Vietnam 2004-2007	0.951258	0.985942	0.834368	0.996313	0.0643121
Vietnam 2008-2011	0.907294	0.971792	0.437535	0.997527	0.103737
Vietnam 2012-2015	0.968392	0.991811	0.621844	0.997771	0.01934
Vietnam 2016-2019	0.935657	0.972025	0.28238	0.997119	0.0247579
Zambia 2016-2019	0.741514	0.768877	0.323995	0.996423	0.408611
IQR= interquartile range

## Sheet: Table S3
Supplementary Table 3. Chromosomal regions with high IBD fractions (95% quartile) and their corresponding genes and gene products
Chromosome	Start	End	Genes	Products	IBD Fractiona
					Central Africa	East Africa	Horn of Africa	Oceania	South America	South Asia	South Central Africa	Southeast Asia	West Africa
2	820001	830000	PF3D7_0220400	DnaJ protein, putative, pseudogene	0.007	0.003	0.049	0.046	0.114	0.006	0.017	0.083	0.002
2	870001	880000	PF3D7_0221800	hypothetical protein	0.01	0.015	0.029	0.044	0.163	0.019	0.017	0.082	0.013
3	140001	150000	PF3D7_0302500(CLAG3.1); PF3D7_0302600(ABCB4)	cytoadherence linked asexual protein 3.1; ABC transporter B family member 4, putative	0.004	0.002	0.039	0.033	0.11	0.015	0.012	0.056	0.003
4	540001	550000	PF3D7_0412100(mtRPS12)	ribosomal protein S12, mitochondrial	0.001	0.002	0.071	0.028	0.188	0.005	0.013	0.069	0.006
4	610001	620000	PF3D7_0413600(RPT3)	26S protease regulatory subunit 6B, putative	0.004	0.004	0.076	0.046	0.264	0.011	0.017	0.085	0.012
4	620001	630000	PF3D7_0414000(SMC3)	structural maintenance of chromosomes protein 3	0.003	0.004	0.075	0.045	0.28	0.009	0.016	0.08	0.011
4	630001	640000	PF3D7_0414000(SMC3)	structural maintenance of chromosomes protein 3	0.004	0.005	0.075	0.046	0.284	0.012	0.016	0.084	0.012
4	660001	670000	PF3D7_0414900(ARO)	armadillo-domain containing rhoptry protein	0.003	0.002	0.073	0.034	0.234	0.006	0.016	0.058	0.009
4	690001	700000	PF3D7_0415900	60S ribosomal protein L15, putative	0.003	0.002	0.057	0.028	0.186	0.004	0.012	0.049	0.006
4	710001	720000	PF3D7_0416400(HAT1)	histone acetyltransferase, putative	0.002	0.003	0.079	0.024	0.112	0.003	0.013	0.049	0.004
4	720001	730000	PF3D7_0416400(HAT1)	histone acetyltransferase, putative	0.002	0.003	0.085	0.021	0.134	0.003	0.013	0.049	0.004
5	480001	490000	PF3D7_0511500	RNA pseudouridylate synthase, putative	0.003	0.008	0.081	0.044	0.13	0.005	0.013	0.036	0.001
5	490001	500000	PF3D7_0511500	RNA pseudouridylate synthase, putative	0.002	0.005	0.079	0.044	0.123	0.004	0.012	0.035	0.001
5	880001	890000	PF3D7_0521700(DDX1)	ATP-dependent RNA helicase DDX1, putative	0.006	0.011	0.079	0.058	0.341	0.007	0.012	0.077	0.003
5	900001	910000	PF3D7_0522200(TAF10)	transcription initiation factor TFIID subunit 10, putative	0.009	0.017	0.082	0.079	0.378	0.008	0.012	0.078	0.004
5	940001	950000	PF3D7_0522600; PF3D7_0522700(SufA)	magnesium transporter NIPA, putative; iron-sulfur cluster assembly protein SufA	0.01	0.013	0.086	0.093	0.381	0.009	0.012	0.077	0.006
5	950001	960000	PF3D7_0523000(MDR1)	multidrug resistance protein 1	0.008	0.01	0.072	0.092	0.37	0.009	0.012	0.07	0.006
5	960001	970000	PF3D7_0523000(MDR1)	multidrug resistance protein 1	0.006	0.007	0.064	0.089	0.36	0.008	0.012	0.059	0.005
5	970001	980000	PF3D7_0523300	cytochrome c oxidase subunit ApiCOX18, putative	0.003	0.006	0.057	0.083	0.36	0.006	0.012	0.047	0.004
5	1120001	1130000	PF3D7_0527000(MCM3)	DNA replication licensing factor MCM3, putative	0.001	0.012	0.026	0.032	0.212	0.002	0.012	0.045	0
6	140001	150000	PF3D7_0603600	AT-rich interactive domain-containing protein, putative	0.001	0.001	0.03	0.03	0.186	0.003	0.012	0.103	0.001
6	170001	180000	PF3D7_0604100(SIP2)	AP2 domain transcription factor	0	0.001	0.023	0.022	0.158	0.002	0.012	0.1	0
6	220001	230000	PF3D7_0605200; PF3D7_0605300(ARK1)	acylphosphatase, putative; serine/threonine protein kinase ARK1	0.001	0.001	0.023	0.02	0.16	0.002	0.012	0.1	0
6	230001	240000	PF3D7_0605800(RAD50)	DNA repair protein RAD50, putative	0.001	0.001	0.024	0.021	0.161	0.002	0.012	0.1	0
6	670001	680000	PF3D7_0616200(NDC80)	kinetochore protein NDC80, putative	0.001	0.001	0.033	0.028	0.36	0.002	0.012	0.082	0.001
6	840001	850000	PF3D7_0620000(PIMMS43)	PIMMS43 protein	0.003	0.007	0.056	0.036	0.227	0.004	0.016	0.087	0.003
6	1060001	1070000	PF3D7_0626500; PF3D7_0626300(FabB/FabF)	conserved Plasmodium protein, unknown function; 3-oxoacyl-acyl-carrier protein synthase I/II	0.011	0.015	0.132	0.039	0.318	0.005	0.014	0.08	0.009
6	1070001	1080000	PF3D7_0626800(PyrK); PF3D7_0626500	pyruvate kinase; conserved Plasmodium protein, unknown function	0.008	0.015	0.129	0.041	0.314	0.005	0.015	0.081	0.009
6	1080001	1090000	PF3D7_0626900; PF3D7_0626800(PyrK)	ribosomal protein L46, mitochondrial, putative; pyruvate kinase	0.009	0.014	0.118	0.037	0.301	0.005	0.016	0.081	0.007
6	1110001	1120000	PF3D7_0627800(ACS)	acetyl-CoA synthetase, putative	0.1	0.091	0.217	0.057	0.332	0.01	0.072	0.092	0.037
6	1200001	1210000	PF3D7_0629300(PL)	phospholipase, putative	0.013	0.049	0.209	0.056	0.279	0.023	0.07	0.095	0.032
6	1210001	1220000	PF3D7_0629400(PABP3); PF3D7_0629500(AAT1)	polyadenylate-binding protein 3, putative; amino acid transporter AAT1	0.015	0.034	0.139	0.063	0.279	0.023	0.059	0.102	0.03
6	1220001	1230000	PF3D7_0629700(SET1)	SET domain protein, putative	0.019	0.018	0.15	0.063	0.28	0.023	0.043	0.11	0.034
6	1230001	1240000	PF3D7_0629700(SET1)	SET domain protein, putative	0.021	0.02	0.157	0.064	0.271	0.022	0.041	0.135	0.039
6	1240001	1250000	PF3D7_0629700(SET1)	SET domain protein, putative	0.021	0.018	0.168	0.063	0.266	0.016	0.038	0.126	0.038
6	1250001	1260000	PF3D7_0630100	alpha/beta hydrolase, putative	0.029	0.022	0.161	0.11	0.25	0.029	0.047	0.165	0.046
6	1290001	1300000	PF3D7_0631100	Plasmodium exported protein (PHISTb), unknown function	0.021	0.01	0.118	0.123	0.204	0.026	0.019	0.17	0.026
7	210001	220000	PF3D7_0704600(UT)	HECT-type E3 ubiquitin ligase UT	0.004	0.004	0.031	0.042	0.226	0.016	0.012	0.078	0.004
7	220001	230000	PF3D7_0704600(UT)	HECT-type E3 ubiquitin ligase UT	0.006	0.009	0.038	0.046	0.227	0.029	0.013	0.099	0.006
7	290001	300000	PF3D7_0706000	importin-7, putative	0.019	0.012	0.104	0.048	0.204	0.01	0.016	0.072	0.005
7	300001	310000	PF3D7_0706500	conserved Plasmodium protein, unknown function	0.013	0.013	0.103	0.047	0.197	0.006	0.015	0.074	0.004
7	310001	320000	PF3D7_0706500	conserved Plasmodium protein, unknown function	0.008	0.008	0.101	0.041	0.196	0.005	0.014	0.061	0.003
7	320001	330000	PF3D7_0707200	conserved Plasmodium protein, unknown function	0.008	0.006	0.114	0.042	0.234	0.005	0.014	0.065	0.005
7	330001	340000	PF3D7_0707300(RAMA); PF3D7_0707200	rhoptry-associated membrane antigen; conserved Plasmodium protein, unknown function	0.005	0.006	0.106	0.043	0.253	0.009	0.015	0.06	0.006
7	340001	350000	PF3D7_0707300(RAMA); PF3D7_0707400	rhoptry-associated membrane antigen; AAA family ATPase, putative	0.005	0.008	0.092	0.045	0.252	0.008	0.013	0.058	0.008
7	350001	360000	PF3D7_0707700	E3 ubiquitin-protein ligase, putative	0.006	0.008	0.1	0.048	0.259	0.011	0.012	0.061	0.009
7	360001	370000	PF3D7_0707700	E3 ubiquitin-protein ligase, putative	0.01	0.011	0.109	0.041	0.429	0.019	0.012	0.062	0.014
7	370001	380000	PF3D7_0708100(RPB10)	DNA-directed RNA polymerases I, II, and III subunit RPABC5, putative	0.017	0.018	0.132	0.044	0.429	0.028	0.012	0.062	0.021
7	380001	390000	PF3D7_0708500	heat shock protein 86 family protein	0.031	0.03	0.172	0.038	0.429	0.032	0.012	0.055	0.033
7	390001	400000	PF3D7_0708800(HSP110c); PF3D7_0708700	heat shock protein 110; Cg8 protein	0.041	0.037	0.179	0.034	0.427	0.049	0.012	0.045	0.04
7	400001	410000	PF3D7_0709000(CRT)	chloroquine resistance transporter	0.066	0.043	0.19	0.082	0.429	0.085	0.013	0.076	0.049
7	420001	430000	PF3D7_0709500	nucleic acid-binding protein, putative	0.103	0.04	0.189	0.123	0.656	0.1	0.013	0.106	0.057
7	430001	440000	PF3D7_0709700(PARE)	prodrug activation and resistance esterase	0.072	0.033	0.147	0.132	0.654	0.087	0.015	0.11	0.04
7	460001	470000	PF3D7_0710200	conserved Plasmodium protein, unknown function	0.018	0.018	0.106	0.206	0.658	0.047	0.015	0.111	0.015
7	470001	480000	PF3D7_0710200; PF3D7_0710600(RPL34)	conserved Plasmodium protein, unknown function; 60S ribosomal protein L34	0.012	0.017	0.096	0.178	0.528	0.031	0.016	0.099	0.013
7	480001	490000	PF3D7_0710700	conserved Plasmodium protein, unknown function	0.006	0.007	0.103	0.159	0.445	0.019	0.012	0.057	0.005
7	610001	620000	PF3D7_0713600	ribosomal protein S5, mitochondrial, putative	0.005	0.008	0.166	0.131	0.517	0.016	0.014	0.056	0.006
7	620001	630000	PF3D7_0713600	ribosomal protein S5, mitochondrial, putative	0.004	0.007	0.19	0.119	0.516	0.014	0.012	0.056	0.005
7	640001	650000	PF3D7_0714000(H2B.Z)	histone H2B variant	0.001	0.003	0.039	0.057	0.36	0.006	0.012	0.038	0.003
7	650001	660000	PF3D7_0714200	conserved Plasmodium protein, unknown function	0.001	0.003	0.039	0.06	0.36	0.006	0.012	0.037	0.002
7	660001	670000	PF3D7_0714500	transcription elongation factor s-II, putative	0.001	0.004	0.033	0.068	0.364	0.005	0.012	0.037	0.003
7	690001	700000	PF3D7_0715600; PF3D7_0715900(CDF)	GTP-binding translation elongation factor tu family protein, putative; cation diffusion facilitator family protein, putative	0.002	0.003	0.042	0.059	0.371	0.005	0.012	0.037	0.003
7	700001	710000	PF3D7_0715900(CDF)	cation diffusion facilitator family protein, putative	0.003	0.003	0.043	0.059	0.371	0.004	0.012	0.035	0.004
8	380001	390000	PF3D7_0807600; PF3D7_0807300(RAB18)	conserved Plasmodium protein, unknown function; ras-related protein Rab-18	0	0	0.041	0.07	0.135	0.002	0.012	0.08	0
8	390001	400000	PF3D7_0807600; PF3D7_0807800(RPN10)	conserved Plasmodium protein, unknown function; 26S proteasome regulatory subunit RPN10, putative	0.001	0.001	0.047	0.086	0.125	0.004	0.012	0.086	0.001
8	400001	410000	PF3D7_0807800(RPN10); PF3D7_0807900(TyrRS)	26S proteasome regulatory subunit RPN10, putative; tyrosine--tRNA ligase	0.001	0.003	0.059	0.099	0.156	0.009	0.012	0.1	0.001
8	410001	420000	PF3D7_0808200(PMX)	plasmepsin X	0.002	0.011	0.062	0.128	0.203	0.016	0.012	0.125	0.001
8	500001	510000	PF3D7_0809900(JmjC1)	JmjC domain-containing protein, putative	0.006	0.07	0.18	0.164	0.359	0.038	0.049	0.232	0.006
8	510001	520000	PF3D7_0810100; PF3D7_0809900(JmjC1)	ribosomal protein L33, apicoplast, putative; JmjC domain-containing protein, putative	0.004	0.054	0.179	0.162	0.36	0.03	0.035	0.227	0.005
8	540001	550000	PF3D7_0810800(PPPK-DHPS); PF3D7_0810600(DBP1)	hydroxymethyldihydropterin pyrophosphokinase-dihydropteroate synthase; ATP-dependent RNA helicase DBP1, putative	0.003	0.023	0.168	0.141	0.377	0.025	0.018	0.184	0.005
8	550001	560000	PF3D7_0810800(PPPK-DHPS)	hydroxymethyldihydropterin pyrophosphokinase-dihydropteroate synthase	0.002	0.021	0.154	0.142	0.37	0.021	0.018	0.184	0.005
8	560001	570000	PF3D7_0811300(CAF1)	CCR4-associated factor 1	0.001	0.01	0.143	0.127	0.37	0.019	0.018	0.181	0.005
8	570001	580000	PF3D7_0811500(CARM1); PF3D7_0811300(CAF1)	histone-arginine methyltransferase CARM1, putative; CCR4-associated factor 1	0.001	0.006	0.139	0.116	0.371	0.014	0.015	0.117	0.006
8	580001	590000	PF3D7_0811500(CARM1)	histone-arginine methyltransferase CARM1, putative	0.002	0.007	0.153	0.114	0.372	0.017	0.015	0.121	0.007
8	610001	620000	PF3D7_0812220(YihA3)	GTP-binding protein YihA3	0.001	0.004	0.134	0.102	0.371	0.013	0.013	0.108	0.005
8	620001	630000	PF3D7_0812500; PF3D7_0812400(KARalpha)	RNA-binding protein, putative; karyopherin alpha	0.001	0.003	0.105	0.081	0.37	0.008	0.012	0.095	0.004
8	640001	650000	PF3D7_0813100; PF3D7_0813000(KIC7)	conserved Plasmodium protein, unknown function; protein KIC7	0.001	0.002	0.105	0.066	0.369	0.009	0.012	0.092	0.002
8	650001	660000	PF3D7_0813400	conserved protein, unknown function	0.001	0.002	0.097	0.054	0.363	0.004	0.012	0.089	0.002
8	660001	670000	PF3D7_0813600; PF3D7_0813400	translation initiation factor SUI1, putative; conserved protein, unknown function	0.001	0.002	0.095	0.051	0.363	0.004	0.012	0.09	0.002
8	670001	680000	PF3D7_0813600; PF3D7_0813900(RPS16)	translation initiation factor SUI1, putative; 40S ribosomal protein S16, putative	0.001	0.002	0.093	0.045	0.352	0.004	0.012	0.089	0.002
8	680001	690000	PF3D7_0814000	60S ribosomal protein L13-2, putative	0.001	0.001	0.091	0.04	0.348	0.003	0.012	0.083	0.002
8	800001	810000	PF3D7_0817600	conserved protein, unknown function	0	0.001	0.035	0.033	0.149	0.002	0.012	0.1	0.001
8	830001	840000	PF3D7_0818200(14-3-3I)	14-3-3 protein	0	0.001	0.031	0.037	0.128	0.002	0.012	0.1	0.001
8	840001	850000	PF3D7_0818600(PBLP)	BEM46-like protein, putative	0.001	0.001	0.032	0.037	0.142	0.002	0.012	0.106	0.001
8	860001	870000	PF3D7_0818900(HSP70)	heat shock protein 70	0.001	0.001	0.029	0.035	0.128	0.002	0.012	0.108	0.001
8	870001	880000	PF3D7_0819400(PLP4)	perforin-like protein 4	0.001	0.001	0.029	0.035	0.166	0.003	0.012	0.109	0.001
8	880001	890000	PF3D7_0819600; PF3D7_0819400(PLP4)	conserved protein, unknown function; perforin-like protein 4	0.001	0.001	0.033	0.033	0.179	0.003	0.012	0.111	0.001
8	890001	900000	PF3D7_0819900(LSM3)	U6 snRNA-associated Sm-like protein LSm3, putative	0.001	0.001	0.031	0.026	0.174	0.003	0.012	0.111	0.001
8	900001	910000	PF3D7_0820000(SRCAP)	Snf2-related CBP activator, putative	0.001	0.001	0.031	0.024	0.166	0.002	0.012	0.109	0.001
8	1300001	1310000	PF3D7_0830600	Plasmodium exported protein (PHISTc), unknown function	0.008	0.007	0.035	0.049	0.231	0.017	0.016	0.068	0.009
8	1360001	1370000	PF3D7_0831700(HSP70x)	heat shock protein 70	0.005	0.006	0.039	0.031	0.144	0.014	0.014	0.069	0.013
9	1410001	1420000	PF3D7_0935800(CLAG9)	cytoadherence linked asexual protein 9	0.004	0.003	0.044	0.088	0.308	0.003	0.014	0.046	0.009
9	1420001	1430000	PF3D7_0936000(REX2); PF3D7_0935900(REX1)	ring-exported protein 2; ring-exported protein 1	0.003	0.003	0.045	0.054	0.309	0.003	0.014	0.04	0.007
10	70001	80000	PF3D7_1001400(XL1)	exported lipase 1	0.006	0.006	0.059	0.064	0.245	0.012	0.016	0.077	0.005
10	230001	240000	PF3D7_1005300	conserved Plasmodium protein, unknown function	0.002	0.004	0.027	0.068	0.213	0.004	0.014	0.046	0.001
10	420001	430000	PF3D7_1010600(eIF2beta)	eukaryotic translation initiation factor 2 subunit beta	0.001	0	0.017	0.077	0.106	0.002	0.012	0.04	0
10	450001	460000	PF3D7_1011800(PREBP)	PRE-binding protein	0.001	0	0.018	0.089	0.107	0.002	0.012	0.044	0
10	470001	480000	PF3D7_1012400(HGPRT)	hypoxanthine-guanine phosphoribosyltransferase	0.001	0.001	0.02	0.089	0.097	0.002	0.012	0.042	0
10	490001	500000	PF3D7_1012900(ATG18); PF3D7_1012800	autophagy-related protein 18; conserved Plasmodium protein, unknown function	0.001	0.001	0.025	0.098	0.121	0.002	0.012	0.054	0
10	500001	510000	PF3D7_1013000	zinc finger protein, putative	0.001	0.002	0.025	0.083	0.134	0.003	0.012	0.054	0
10	510001	520000	PF3D7_1013200	conserved Plasmodium protein, unknown function	0.001	0.002	0.026	0.074	0.141	0.003	0.012	0.053	0.001
10	1400001	1410000	PF3D7_1035400(MSP3)	merozoite surface protein 3	0.009	0.011	0.073	0.05	0.284	0.014	0.018	0.053	0.011
10	1450001	1460000	PF3D7_1036900	conserved Plasmodium protein, unknown function	0.014	0.019	0.069	0.039	0.186	0.025	0.021	0.043	0.02
11	530001	540000	PF3D7_1113900(MAPK2)	mitogen-activated protein kinase 2	0.001	0.003	0.036	0.068	0.121	0.003	0.012	0.063	0.001
11	1270001	1280000	PF3D7_1132800(AQP)	aquaglyceroporin	0.001	0.001	0.038	0.034	0.232	0.003	0.016	0.069	0.002
11	1280001	1290000	PF3D7_1133200	conserved Plasmodium protein, unknown function	0.001	0.002	0.041	0.037	0.308	0.004	0.017	0.076	0.002
12	700001	710000	PF3D7_1218000(TRAMP); PF3D7_1218200	thrombospondin-related apical membrane protein; symplekin domain-containing protein, putative	0.003	0	0.023	0.072	0.156	0.004	0.012	0.048	0.001
12	710001	720000	PF3D7_1218300(AP2-MU); PF3D7_1218200	AP-2 complex subunit mu; symplekin domain-containing protein, putative	0.003	0.001	0.026	0.072	0.149	0.005	0.012	0.048	0.002
12	750001	760000	PF3D7_1219100(CHC); PF3D7_1219000(FRM2)	clathrin heavy chain, putative; formin 2	0.007	0.002	0.041	0.055	0.139	0.013	0.012	0.061	0.005
12	760001	770000	PF3D7_1219100(CHC)	clathrin heavy chain, putative	0.007	0.003	0.04	0.055	0.129	0.013	0.012	0.061	0.006
12	800001	810000	PF3D7_1220300	cell cycle associated protein, putative	0.008	0.004	0.05	0.062	0.22	0.016	0.012	0.083	0.005
12	810001	820000	PF3D7_1220300	cell cycle associated protein, putative	0.008	0.004	0.053	0.061	0.219	0.017	0.012	0.092	0.005
12	830001	840000	PF3D7_1221000(SET10); PF3D7_1220900(HP1)	histone-lysine N-methyltransferase, H3 lysine-4 specific; heterochromatin protein 1	0.005	0.005	0.057	0.045	0.22	0.018	0.013	0.093	0.003
12	840001	850000	PF3D7_1221000(SET10)	histone-lysine N-methyltransferase, H3 lysine-4 specific	0.005	0.007	0.049	0.054	0.225	0.024	0.013	0.093	0.003
12	900001	910000	PF3D7_1222600(AP2-G)	AP2 domain transcription factor AP2-G	0.006	0.01	0.049	0.055	0.216	0.016	0.021	0.112	0.002
12	910001	920000	PF3D7_1222600(AP2-G)	AP2 domain transcription factor AP2-G	0.007	0.013	0.047	0.056	0.214	0.015	0.022	0.107	0.002
12	920001	930000	PF3D7_1223100(PKAr)	cAMP-dependent protein kinase regulatory subunit	0.009	0.016	0.052	0.054	0.229	0.013	0.027	0.108	0.002
12	970001	980000	PF3D7_1224000(GCH1)	GTP cyclohydrolase 1	0.005	0.008	0.061	0.051	0.116	0.022	0.02	0.108	0.001
12	980001	990000	PF3D7_1224300(PABP1)	polyadenylate-binding protein 1, putative	0.004	0.009	0.061	0.043	0.116	0.02	0.017	0.101	0.001
12	990001	1000000	PF3D7_1224500(ASF1); PF3D7_1224300(PABP1); PF3D7_1224400	histone chaperone ASF1, putative; polyadenylate-binding protein 1, putative; WD repeat-containing protein, putative	0.004	0.011	0.061	0.044	0.139	0.016	0.019	0.097	0.001
12	1020001	1030000	PF3D7_1225200	DNA-binding protein, putative	0.003	0.013	0.036	0.041	0.15	0.01	0.017	0.095	0.002
12	2150001	2160000	PF3D7_1252600; PF3D7_1252800	esterase, putative; Plasmodium exported protein (PHISTb), unknown function	0.003	0.006	0.06	0.041	0.231	0.005	0.012	0.109	0.003
12	2160001	2170000	PF3D7_1252800	Plasmodium exported protein (PHISTb), unknown function	0.003	0.007	0.059	0.057	0.228	0.008	0.012	0.114	0.004
13	100001	110000	PF3D7_1301700(CBP2)	CX3CL1-binding protein 2	0.01	0.009	0.029	0.046	0.172	0.017	0.015	0.066	0.013
13	650001	660000	PF3D7_1315400	zinc finger (CCCH type) protein, putative	0.001	0.002	0.077	0.059	0.095	0.002	0.013	0.053	0.001
13	720001	730000	PF3D7_1317200(ApiAP2)	AP2 domain transcription factor AP2-FG, putative	0.001	0.001	0.036	0.071	0.12	0.002	0.013	0.045	0.001
13	730001	740000	PF3D7_1317600	conserved Plasmodium protein, unknown function	0.001	0.001	0.036	0.071	0.131	0.002	0.013	0.052	0.001
13	740001	750000	PF3D7_1317800(RPS19)	40S ribosomal protein S19	0.001	0.001	0.032	0.072	0.134	0.002	0.013	0.051	0.001
13	1470001	1480000	PF3D7_1336200	conserved Plasmodium protein, unknown function	0.004	0.006	0.051	0.034	0.201	0.005	0.017	0.081	0.003
13	1870001	1880000	PF3D7_1346800(P47); PF3D7_1346700(P48/45)	6-cysteine protein P47; 6-cysteine protein	0.001	0.001	0.038	0.071	0.257	0.01	0.012	0.079	0.001
13	1880001	1890000	PF3D7_1346800(P47); PF3D7_1347200(NT1)	6-cysteine protein P47; nucleoside transporter 1	0.001	0.001	0.039	0.072	0.232	0.01	0.012	0.085	0.001
13	1910001	1920000	PF3D7_1347900	conserved Plasmodium protein, unknown function	0	0.001	0.037	0.041	0.192	0.002	0.012	0.111	0
13	1970001	1980000	PF3D7_1349200	glutamate--tRNA ligase, putative	0.001	0.001	0.021	0.025	0.132	0.002	0.012	0.103	0
13	1990001	2000000	PF3D7_1349600	conserved Plasmodium protein, unknown function	0.001	0.001	0.023	0.026	0.128	0.002	0.012	0.102	0
13	2000001	2010000	PF3D7_1350100(KRS1)	lysine--tRNA ligase	0	0	0.022	0.021	0.129	0.001	0.012	0.101	0
13	2120001	2130000	PF3D7_1353100	Plasmodium exported protein, unknown function	0.003	0.002	0.038	0.037	0.166	0.006	0.012	0.106	0.001
13	2130001	2140000	PF3D7_1353200(MAHRP2)	membrane associated histidine-rich protein 2	0.002	0.002	0.037	0.035	0.177	0.004	0.012	0.106	0.001
13	2150001	2160000	PF3D7_1353900	proteasome subunit alpha type-7, putative	0.001	0.001	0.026	0.03	0.17	0.002	0.012	0.1	0.001
13	2160001	2170000	PF3D7_1354300	large subunit rRNA methyltransferase, putative	0.001	0.001	0.026	0.031	0.184	0.003	0.012	0.101	0.001
13	2170001	2180000	PF3D7_1354700	conserved Plasmodium protein, unknown function	0.001	0.001	0.025	0.028	0.186	0.002	0.012	0.103	0.001
13	2180001	2190000	PF3D7_1355100(MCM6)	DNA replication licensing factor MCM6	0.001	0.001	0.025	0.027	0.183	0.003	0.012	0.104	0.001
13	2190001	2200000	PF3D7_1355500(PP5); PF3D7_1355100(MCM6)	serine/threonine protein phosphatase 5; DNA replication licensing factor MCM6	0.001	0.001	0.025	0.028	0.18	0.002	0.012	0.104	0.001
13	2200001	2210000	PF3D7_1355500(PP5); PF3D7_1355700(NIF3)	serine/threonine protein phosphatase 5; NLI interacting factor-like phosphatase, putative	0.001	0.001	0.024	0.028	0.178	0.002	0.012	0.104	0.001
13	2210001	2220000	PF3D7_1355700(NIF3)	NLI interacting factor-like phosphatase, putative	0.001	0	0.019	0.024	0.193	0.002	0.012	0.104	0
13	2220001	2230000	PF3D7_1356100	conserved Plasmodium protein, unknown function	0.001	0.001	0.02	0.025	0.22	0.002	0.012	0.105	0.001
14	60001	70000	PF3D7_1401600	Plasmodium exported protein (PHISTb), unknown function	0.001	0.001	0.025	0.043	0.405	0.002	0.012	0.041	0.001
14	80001	90000	PF3D7_1402200	cytochrome c oxidase subunit ApiCOX19, putative	0.001	0	0.029	0.034	0.409	0.002	0.012	0.041	0
14	90001	100000	PF3D7_1402500	ribosomal protein S27a, putative	0.001	0	0.026	0.03	0.41	0.002	0.012	0.052	0
14	100001	110000	PF3D7_1402800	conserved Plasmodium protein, unknown function	0.001	0	0.025	0.03	0.412	0.002	0.012	0.054	0
14	110001	120000	PF3D7_1403100(CAPD2)	condensin complex subunit 1, putative	0.001	0	0.027	0.026	0.412	0.002	0.012	0.056	0
14	120001	130000	PF3D7_1403200	EGF domain-containing protein, putative	0.001	0.001	0.025	0.027	0.411	0.002	0.012	0.056	0
14	140001	150000	PF3D7_1403900(CPPED1)	serine/threonine protein phosphatase CPPED1, putative	0.001	0.001	0.02	0.028	0.412	0.002	0.012	0.057	0
14	160001	170000	PF3D7_1404700	cysteine-rich small secreted protein CSS, putative	0.001	0.001	0.018	0.027	0.41	0.002	0.012	0.059	0.001
14	210001	220000	PF3D7_1406200(SPT6)	transcription elongation factor SPT6, putative	0.001	0.001	0.02	0.039	0.457	0.002	0.012	0.067	0.001
14	220001	230000	PF3D7_1406200(SPT6)	transcription elongation factor SPT6, putative	0.001	0.001	0.021	0.037	0.455	0.002	0.012	0.068	0.001
14	230001	240000	PF3D7_1406400(PPR1)	pentatricopeptide repeat-containing protein 1	0.001	0.001	0.029	0.038	0.454	0.002	0.012	0.069	0.001
14	250001	260000	PF3D7_1407100(NOP1)	rRNA 2'-O-methyltransferase fibrillarin, putative	0.001	0.001	0.032	0.035	0.449	0.002	0.012	0.072	0.001
14	300001	310000	PF3D7_1408200(ApiAP2)	AP2 domain transcription factor AP2-G2, putative	0.001	0	0.031	0.027	0.367	0.002	0.012	0.067	0
14	310001	320000	PF3D7_1408400(FANCJ)	FANCJ-like helicase, putative	0	0	0.021	0.022	0.369	0.001	0.012	0.063	0
14	320001	330000	PF3D7_1408500; PF3D7_1408600	conserved Plasmodium protein, unknown function; 40S ribosomal protein S8e, putative	0.001	0.001	0.02	0.023	0.368	0.001	0.012	0.067	0
14	1720001	1730000	PF3D7_1442400(KIC9)	protein KIC9	0.001	0.001	0.033	0.031	0.36	0.002	0.013	0.057	0.001
14	1750001	1760000	PF3D7_1442900(ARFGEF)	Sec7 domain-containing protein ARFGEF, putative	0.001	0.001	0.042	0.033	0.363	0.002	0.013	0.063	0.001
14	1760001	1770000	PF3D7_1443100; PF3D7_1442900(ARFGEF)	conserved Plasmodium protein, unknown function; Sec7 domain-containing protein ARFGEF, putative	0.001	0.001	0.042	0.031	0.365	0.002	0.013	0.063	0.001
14	1770001	1780000	PF3D7_1443200; PF3D7_1443100	heptatricopeptide repeat-containing protein, putative; conserved Plasmodium protein, unknown function	0.001	0.001	0.042	0.028	0.365	0.002	0.013	0.058	0.001
14	1800001	1810000	PF3D7_1444100	conserved Plasmodium protein, unknown function	0.001	0.001	0.033	0.028	0.367	0.002	0.013	0.059	0.001
14	1810001	1820000	PF3D7_1444100	conserved Plasmodium protein, unknown function	0.001	0.001	0.032	0.027	0.366	0.002	0.013	0.058	0.001
14	1820001	1830000	PF3D7_1444100	conserved Plasmodium protein, unknown function	0.001	0.001	0.03	0.026	0.365	0.002	0.013	0.056	0.001
14	1850001	1860000	PF3D7_1445200(MAK5)	ATP-dependent RNA helicase MAK5, putative	0.001	0.001	0.03	0.028	0.373	0.001	0.012	0.053	0.001
14	2750001	2760000	PF3D7_1467300(DXR); PF3D7_1467600	1-deoxy-D-xylulose 5-phosphate reductoisomerase; conserved Plasmodium protein, unknown function	0.001	0.002	0.04	0.071	0.184	0.003	0.013	0.075	0.001
14	2760001	2770000	PF3D7_1467600	conserved Plasmodium protein, unknown function	0.001	0.002	0.039	0.073	0.173	0.003	0.013	0.074	0
14	2770001	2780000	PF3D7_1468000	conserved Plasmodium protein, unknown function	0.001	0.001	0.043	0.073	0.166	0.002	0.012	0.073	0
14	2780001	2790000	PF3D7_1468000; PF3D7_1468100	conserved Plasmodium protein, unknown function; MORC family protein, putative	0.001	0.002	0.042	0.073	0.166	0.002	0.012	0.073	0
14	3110001	3120000	PF3D7_1475600(BDP4)	bromodomain protein 4, putative	0.001	0.002	0.056	0.044	0.261	0.012	0.018	0.052	0.002
aRegions with IBD fractions in 0.95 quantile are shown in bold.

## Sheet: Table S4
Supplementary Table 4. Gene Ontology Enrichment for biological processes, cellular components and molecular functions for genes with high IBD fractions
Type	P-value (FDR)	Number of Genes	Pathway Genes	Fold Enrichment	GO Term	Genes
Biological Process	0.0133222	7	38	5.77193	GO:0071824 protein-DNA complex subunit organization	PF3D7_0413600 PF3D7_0527000 PF3D7_0714000 PF3D7_0820000 PF3D7_1355100 PF3D7_1406200 PF3D7_1224500
Biological Process	0.0212901	8	57	4.39766	GO:0006325 chromatin organization	PF3D7_0714000 PF3D7_0809900 PF3D7_0820000 PF3D7_1220900 PF3D7_1224500 PF3D7_1406200 PF3D7_0416400 PF3D7_0629700
Biological Process	0.0124717	15	133	3.53383	GO:0051276 chromosome organization	PF3D7_0414000 PF3D7_0605800 PF3D7_0616200 PF3D7_0714000 PF3D7_0809900 PF3D7_0820000 PF3D7_1220900 PF3D7_1224500 PF3D7_1355100 PF3D7_1403100 PF3D7_1406200 PF3D7_1408400 PF3D7_0416400 PF3D7_0527000 PF3D7_0629700
Biological Process	0.0127921	14	137	3.20195	GO:1903506 reg. of nucleic acid-templated transcription	PF3D7_0413600 PF3D7_0629700 PF3D7_0811500 PF3D7_0812500 PF3D7_1220900 PF3D7_1355700 PF3D7_1406200 PF3D7_1011800 PF3D7_0708500 PF3D7_0710200 PF3D7_1222600 PF3D7_1317200 PF3D7_1408200 PF3D7_0714500
Biological Process	0.0127921	14	137	3.20195	GO:2001141 reg. of RNA biosynthetic proc.	PF3D7_0413600 PF3D7_0629700 PF3D7_0811500 PF3D7_0812500 PF3D7_1220900 PF3D7_1355700 PF3D7_1406200 PF3D7_1011800 PF3D7_0708500 PF3D7_0710200 PF3D7_1222600 PF3D7_1317200 PF3D7_1408200 PF3D7_0714500
Biological Process	0.0127921	14	137	3.20195	GO:0006355 reg. of transcription DNA-templated	PF3D7_0413600 PF3D7_0629700 PF3D7_0811500 PF3D7_0812500 PF3D7_1220900 PF3D7_1355700 PF3D7_1406200 PF3D7_1011800 PF3D7_0708500 PF3D7_0710200 PF3D7_1222600 PF3D7_1317200 PF3D7_1408200 PF3D7_0714500
Biological Process	0.0127921	18	201	2.80597	GO:0019219 reg. of nucleobase-containing compound metabolic proc.	PF3D7_0413600 PF3D7_0629700 PF3D7_0811300 PF3D7_0811500 PF3D7_0812500 PF3D7_1220900 PF3D7_1355700 PF3D7_1406200 PF3D7_1408400 PF3D7_1443200 PF3D7_1011800 PF3D7_0708500 PF3D7_0710200 PF3D7_1222600 PF3D7_1317200 PF3D7_1408200 PF3D7_0414000 PF3D7_0714500
Biological Process	0.0167676	16	185	2.70991	GO:0051252 reg. of RNA metabolic proc.	PF3D7_0413600 PF3D7_0629700 PF3D7_0811300 PF3D7_0811500 PF3D7_0812500 PF3D7_1220900 PF3D7_1355700 PF3D7_1406200 PF3D7_1443200 PF3D7_1011800 PF3D7_0708500 PF3D7_0710200 PF3D7_1222600 PF3D7_1317200 PF3D7_1408200 PF3D7_0714500
Biological Process	0.021468	20	277	2.26233	GO:0051171 reg. of nitrogen compound metabolic proc.	PF3D7_0413600 PF3D7_0629700 PF3D7_0707700 PF3D7_0811300 PF3D7_0811500 PF3D7_0812500 PF3D7_1220900 PF3D7_1355700 PF3D7_1406200 PF3D7_1408400 PF3D7_1443200 PF3D7_1011800 PF3D7_0708500 PF3D7_0710200 PF3D7_1222600 PF3D7_1223100 PF3D7_1317200 PF3D7_1408200 PF3D7_0414000 PF3D7_0714500
Biological Process	0.0133222	23	319	2.25914	GO:0060255 reg. of macromolecule metabolic proc.	PF3D7_0413600 PF3D7_0629700 PF3D7_0707700 PF3D7_0708500 PF3D7_0811300 PF3D7_0811500 PF3D7_0812500 PF3D7_1011800 PF3D7_1113900 PF3D7_1220900 PF3D7_1355700 PF3D7_1406200 PF3D7_1408400 PF3D7_1443200 PF3D7_0416400 PF3D7_0710200 PF3D7_0819900 PF3D7_1222600 PF3D7_1223100 PF3D7_1317200 PF3D7_1408200 PF3D7_0414000 PF3D7_0714500
Biological Process	0.027008	19	266	2.2381	GO:0010468 reg. of gene expression	PF3D7_0413600 PF3D7_0629700 PF3D7_0708500 PF3D7_0811300 PF3D7_0811500 PF3D7_0812500 PF3D7_1011800 PF3D7_1113900 PF3D7_1220900 PF3D7_1355700 PF3D7_1406200 PF3D7_1443200 PF3D7_0416400 PF3D7_0710200 PF3D7_0819900 PF3D7_1222600 PF3D7_1317200 PF3D7_1408200 PF3D7_0714500
Biological Process	0.0238634	20	282	2.22222	GO:0080090 reg. of primary metabolic proc.	PF3D7_0413600 PF3D7_0629700 PF3D7_0707700 PF3D7_0811300 PF3D7_0811500 PF3D7_0812500 PF3D7_1220900 PF3D7_1355700 PF3D7_1406200 PF3D7_1408400 PF3D7_1443200 PF3D7_1011800 PF3D7_0708500 PF3D7_0710200 PF3D7_1222600 PF3D7_1223100 PF3D7_1317200 PF3D7_1408200 PF3D7_0414000 PF3D7_0714500
Biological Process	0.0246717	20	284	2.20657	GO:0031323 reg. of cellular metabolic proc.	PF3D7_0413600 PF3D7_0629700 PF3D7_0707700 PF3D7_0811300 PF3D7_0811500 PF3D7_0812500 PF3D7_1220900 PF3D7_1355700 PF3D7_1406200 PF3D7_1408400 PF3D7_1443200 PF3D7_1011800 PF3D7_0708500 PF3D7_0710200 PF3D7_1222600 PF3D7_1223100 PF3D7_1317200 PF3D7_1408200 PF3D7_0414000 PF3D7_0714500
Biological Process	0.0318064	22	336	2.05159	GO:0043604 amide biosynthetic proc.	PF3D7_0412100 PF3D7_0415900 PF3D7_0627800 PF3D7_0713600 PF3D7_0811300 PF3D7_0813600 PF3D7_1010600 PF3D7_1349200 PF3D7_1350100 PF3D7_0522200 PF3D7_0710600 PF3D7_0714500 PF3D7_0715600 PF3D7_0807900 PF3D7_0810100 PF3D7_0810800 PF3D7_0813900 PF3D7_0814000 PF3D7_1317800 PF3D7_1402500 PF3D7_1406200 PF3D7_1408600
Biological Process	0.0127921	35	581	1.88755	GO:0009059 macromolecule biosynthetic proc.	PF3D7_0412100 PF3D7_0413600 PF3D7_0415900 PF3D7_0605800 PF3D7_0629700 PF3D7_0708100 PF3D7_0713600 PF3D7_0714500 PF3D7_0811300 PF3D7_0811500 PF3D7_0812500 PF3D7_0813600 PF3D7_1010600 PF3D7_1012900 PF3D7_1220900 PF3D7_1349200 PF3D7_1350100 PF3D7_1355700 PF3D7_1406200 PF3D7_1011800 PF3D7_0522200 PF3D7_0708500 PF3D7_0710200 PF3D7_0710600 PF3D7_0715600 PF3D7_0807900 PF3D7_0810100 PF3D7_0813900 PF3D7_0…
Biological Process	0.0127921	38	651	1.82898	GO:0044271 cellular nitrogen compound biosynthetic proc.	PF3D7_0412100 PF3D7_0413600 PF3D7_0415900 PF3D7_0605800 PF3D7_0627800 PF3D7_0629700 PF3D7_0708100 PF3D7_0713600 PF3D7_0714500 PF3D7_0810800 PF3D7_0811300 PF3D7_0811500 PF3D7_0812500 PF3D7_0813600 PF3D7_1010600 PF3D7_1012400 PF3D7_1220900 PF3D7_1224000 PF3D7_1349200 PF3D7_1350100 PF3D7_1355700 PF3D7_1406200 PF3D7_1011800 PF3D7_0522200 PF3D7_0708500 PF3D7_0710200 PF3D7_0710600 PF3D7_0715600 PF3D7_0…
Biological Process	0.0192718	42	783	1.68072	GO:0044249 cellular biosynthetic proc.	PF3D7_0412100 PF3D7_0413600 PF3D7_0415900 PF3D7_0605800 PF3D7_0626300 PF3D7_0627800 PF3D7_0629700 PF3D7_0708100 PF3D7_0713600 PF3D7_0714500 PF3D7_0810800 PF3D7_0811300 PF3D7_0811500 PF3D7_0812500 PF3D7_0813600 PF3D7_1010600 PF3D7_1012400 PF3D7_1012900 PF3D7_1220900 PF3D7_1224000 PF3D7_1349200 PF3D7_1350100 PF3D7_1355700 PF3D7_1406200 PF3D7_1467300 PF3D7_1011800 PF3D7_0522200 PF3D7_0708500 PF3D7_0…
Biological Process	0.021468	42	793	1.65952	GO:1901576 organic substance biosynthetic proc.	PF3D7_0412100 PF3D7_0413600 PF3D7_0415900 PF3D7_0605800 PF3D7_0626300 PF3D7_0627800 PF3D7_0629700 PF3D7_0708100 PF3D7_0713600 PF3D7_0714500 PF3D7_0810800 PF3D7_0811300 PF3D7_0811500 PF3D7_0812500 PF3D7_0813600 PF3D7_1010600 PF3D7_1012400 PF3D7_1012900 PF3D7_1220900 PF3D7_1224000 PF3D7_1349200 PF3D7_1350100 PF3D7_1355700 PF3D7_1406200 PF3D7_1467300 PF3D7_1011800 PF3D7_0522200 PF3D7_0708500 PF3D7_0…
Biological Process	0.0217851	42	798	1.64912	GO:0009058 biosynthetic proc.	PF3D7_0412100 PF3D7_0413600 PF3D7_0415900 PF3D7_0605800 PF3D7_0626300 PF3D7_0627800 PF3D7_0629700 PF3D7_0708100 PF3D7_0713600 PF3D7_0714500 PF3D7_0810800 PF3D7_0811300 PF3D7_0811500 PF3D7_0812500 PF3D7_0813600 PF3D7_1010600 PF3D7_1012400 PF3D7_1012900 PF3D7_1220900 PF3D7_1224000 PF3D7_1349200 PF3D7_1350100 PF3D7_1355700 PF3D7_1406200 PF3D7_1467300 PF3D7_1011800 PF3D7_0522200 PF3D7_0708500 PF3D7_0…
Cellular Component	0.0391155	5	19	8.24561	GO:0098687 chromosomal region	PF3D7_0616200 PF3D7_1220900 PF3D7_1403100 PF3D7_0416400 PF3D7_0605800
Cellular Component	0.0391155	49	967	1.58773	GO:0005634 nucleus	PF3D7_0414000 PF3D7_0521700 PF3D7_0527000 PF3D7_0605800 PF3D7_0629700 PF3D7_0706000 PF3D7_0708100 PF3D7_0708500 PF3D7_0708800 PF3D7_0714500 PF3D7_0807800 PF3D7_0809900 PF3D7_0810600 PF3D7_0811500 PF3D7_0812400 PF3D7_0812500 PF3D7_0819900 PF3D7_0820000 PF3D7_1011800 PF3D7_1113900 PF3D7_1224300 PF3D7_1224400 PF3D7_1353900 PF3D7_1354300 PF3D7_1355100 PF3D7_1355500 PF3D7_1402500 PF3D7_1406200 PF3D7_1…
Molecular Function	0.00332499	7	26	8.4359	GO:0042393 histone binding	PF3D7_0416400 PF3D7_0820000 PF3D7_1220900 PF3D7_1224500 PF3D7_1403100 PF3D7_1406200 PF3D7_0818200
Molecular Function	0.0422635	15	191	2.46073	GO:0005198 structural molecule activity	PF3D7_0412100 PF3D7_0415900 PF3D7_0626900 PF3D7_0710600 PF3D7_0713600 PF3D7_0813900 PF3D7_0814000 PF3D7_1317800 PF3D7_1408600 PF3D7_0522700 PF3D7_0714000 PF3D7_0810100 PF3D7_1219100 PF3D7_1224500 PF3D7_1402500
Molecular Function	0.0307225	42	808	1.62871	GO:0005515 protein binding	PF3D7_0416400 PF3D7_0707700 PF3D7_0807800 PF3D7_0818900 PF3D7_0820000 PF3D7_0831700 PF3D7_1010600 PF3D7_1219100 PF3D7_1220900 PF3D7_1224500 PF3D7_1402500 PF3D7_1403100 PF3D7_1406200 PF3D7_1408400 PF3D7_0812400 PF3D7_0818200 PF3D7_0414000 PF3D7_0511500 PF3D7_0521700 PF3D7_0629700 PF3D7_0706000 PF3D7_0714000 PF3D7_0819600 PF3D7_1012900 PF3D7_1013000 PF3D7_1220300 PF3D7_1224400 PF3D7_1225200 PF3D7_1…
Molecular Function	0.0221047	59	1235	1.4969	GO:1901363 heterocyclic compound binding	PF3D7_0414000 PF3D7_0415900 PF3D7_0527000 PF3D7_0605800 PF3D7_0629400 PF3D7_0714000 PF3D7_0810600 PF3D7_0813600 PF3D7_0813900 PF3D7_0814000 PF3D7_0818900 PF3D7_0819900 PF3D7_0831700 PF3D7_1010600 PF3D7_1011800 PF3D7_1224000 PF3D7_1224300 PF3D7_1350100 PF3D7_1355100 PF3D7_1407100 PF3D7_1408400 PF3D7_1443200 PF3D7_1467300 PF3D7_0604100 PF3D7_1035400 PF3D7_1406400 PF3D7_0302600 PF3D7_0413600 PF3D7_0…
Molecular Function	0.0221047	59	1237	1.49448	GO:0097159 organic cyclic compound binding	PF3D7_0414000 PF3D7_0415900 PF3D7_0527000 PF3D7_0605800 PF3D7_0629400 PF3D7_0714000 PF3D7_0810600 PF3D7_0813600 PF3D7_0813900 PF3D7_0814000 PF3D7_0818900 PF3D7_0819900 PF3D7_0831700 PF3D7_1010600 PF3D7_1011800 PF3D7_1224000 PF3D7_1224300 PF3D7_1350100 PF3D7_1355100 PF3D7_1407100 PF3D7_1408400 PF3D7_1443200 PF3D7_1467300 PF3D7_0604100 PF3D7_1035400 PF3D7_1406400 PF3D7_0302600 PF3D7_0413600 PF3D7_0…
Molecular Function	0.0221047	89	2104	1.32541	GO:0005488 binding	PF3D7_0414000 PF3D7_0415900 PF3D7_0416400 PF3D7_0522700 PF3D7_0527000 PF3D7_0605800 PF3D7_0629400 PF3D7_0707400 PF3D7_0707700 PF3D7_0708100 PF3D7_0714000 PF3D7_0807800 PF3D7_0810600 PF3D7_0812400 PF3D7_0813600 PF3D7_0813900 PF3D7_0814000 PF3D7_0818900 PF3D7_0819900 PF3D7_0820000 PF3D7_0831700 PF3D7_1010600 PF3D7_1011800 PF3D7_1012400 PF3D7_1012900 PF3D7_1219100 PF3D7_1220900 PF3D7_1224000 PF3D7_1…
Molecular Function	0.00643074	119	2940	1.26825	GO:0003674 molecular function	PF3D7_0302600 PF3D7_0412100 PF3D7_0413600 PF3D7_0414000 PF3D7_0415900 PF3D7_0416400 PF3D7_0522700 PF3D7_0523000 PF3D7_0527000 PF3D7_0605800 PF3D7_0626300 PF3D7_0626800 PF3D7_0626900 PF3D7_0627800 PF3D7_0629400 PF3D7_0629500 PF3D7_0629700 PF3D7_0704600 PF3D7_0707400 PF3D7_0707700 PF3D7_0708100 PF3D7_0709700 PF3D7_0710600 PF3D7_0713600 PF3D7_0714000 PF3D7_0715600 PF3D7_0715900 PF3D7_0807300 PF3D7_0…
FDR=False Discovery Rate

## Sheet: Table S5
Supplementary Table 5. Single nucleotide polymorphisms with moderate-high FST (>0.75) for pairwise regional comparisons (MAF>0.1)
Comparison	Chromosome	Position	Reference Allele	Alternative Allele	FST	Gene	Overall MAF
East Africa vs Oceania	2	511004	G	A	0.857734	PF3D7 0212500 (PF3D7 0212500)	0.3949
East Africa vs Oceania	2	623146	T	C	0.945779	PF3D7 0215100 (PF3D7 0215100)	0.4705
East Africa vs Oceania	3	561220	A	G	0.782469	PF3D7 0313800 (PF3D7 0313800)	0.4563
East Africa vs Oceania	3	622763	G	C	0.780416	CTRP (PF3D7 0315200)	0.4009
East Africa vs Oceania	4	748239	A	T	0.889479	DHFR-TS (PF3D7 0417200)	0.21
East Africa vs Oceania	5	1042561	T	G	0.784541	ACS10 (PF3D7 0525100)	0.2959
East Africa vs Oceania	5	1043474	G	T	0.876403	ACS10 (PF3D7 0525100)	0.488
East Africa vs Oceania	6	404679	T	A	0.770064	PF3D7 0609500 (PF3D7 0609500)	0.4538
East Africa vs Oceania	7	435413	C	T	0.75516	PF3D7 0709700 (PF3D7 0709700)	0.02794
East Africa vs Oceania	8	812561	G	A	0.903443	RON5	0.4888
East Africa vs Oceania	8	812570	C	T	0.904531	RON5	0.4889
East Africa vs Oceania	8	812667	G	A	0.881097	RON5 (PF3D7 0817700)	0.4691
East Africa vs Oceania	8	846225	G	T	0.797377	PBLP (PF3D7 0818600)	0.4252
East Africa vs Oceania	8	861388	A	G	0.803145	HSP70 (PF3D7 0818900)	0.4176
East Africa vs Oceania	8	1002018	T	C	0.858527	PF3D7 0822700 (PF3D7 0822700)	0.2002
East Africa vs Oceania	8	1005851	G	C	0.80497	PF3D7 0822800 (PF3D7 0822800)	0.4911
East Africa vs Oceania	9	1406576	G	A	0.809359	GIG (PF3D7 0935600)	0.4711
East Africa vs Oceania	10	1181683	T	C	0.940261	MTRAP (PF3D7 1028700)	0.468
East Africa vs Oceania	11	480718	C	T	0.79978	PF3D7 1112600 (PF3D7 1112600)	0.3219
East Africa vs Oceania	11	638299	T	G	0.997504	HSP101 (PF3D7 1116800)	0.4931
East Africa vs Oceania	12	1114059	T	C	0.78776	CYC2 (PF3D7 1227500)	0.4993
East Africa vs Oceania	13	1697887	T	C	0.750423	PMT (PF3D7 1343000)	0.4451
East Africa vs Oceania	13	1700345	T	C	0.807263	PF3D7 1343100 (PF3D7 1343100)	0.3262
East Africa vs Oceania	13	1879453	T	A	0.772973	P47 (PF3D7 1346800)	0.3506
East Africa vs Oceania	13	1879488	G	A	0.966514	P47 (PF3D7 1346800)	0.4924
East Africa vs Oceania	13	2435370	A	T	0.797276	FLN (PF3D7 1360800)	0.4409
East Africa vs Oceania	14	711335	G	A	0.751075	ATG4 (PF3D7 1417300)	0.4891
East Africa vs Oceania	14	2364543	A	T	0.826521	PF3D7 1457600 (PF3D7 1457600)	0.4767
East Africa vs Oceania	14	2695875	T	C	0.797842	PF3D7 1466200 (PF3D7 1466200)	0.4575
East Africa vs South America	2	511004	G	A	0.852432	PF3D7 0212500 (PF3D7 0212500)	0.3949
East Africa vs South America	2	623146	T	C	0.817182	PF3D7 0215100 (PF3D7 0215100)	0.4705
East Africa vs South America	3	622763	G	C	0.791734	CTRP (PF3D7 0315200)	0.4009
East Africa vs South America	3	849476	C	T	0.800267	Cap380 (PF3D7 0320400)	0.2944
East Africa vs South America	4	677644	A	G	0.85315	PF3D7 0415200 (PF3D7 0415200)	0.115
East Africa vs South America	4	748262	T	C	0.863253	DHFR-TS (PF3D7 0417200)	0.1808
East Africa vs South America	5	1043303	G	A	0.925868	ACS10 (PF3D7 0525100)	0.2836
East Africa vs South America	6	404679	T	A	0.793199	PF3D7 0609500 (PF3D7 0609500)	0.4538
East Africa vs South America	6	1224777	T	A	0.829215	SET1 (PF3D7 0629700)	0.2436
East Africa vs South America	7	403625	A	C	0.758265	CRT (PF3D7 0709000)	0.3507
East Africa vs South America	7	404407	G	T	0.785709	CRT (PF3D7 0709000)	0.3652
East Africa vs South America	7	620660	T	A	0.773308	PF3D7 0713600 (PF3D7 0713600)	0.2945
East Africa vs South America	7	815129	T	C	0.760228	CRMP2 (PF3D7 0718300)	0.3475
East Africa vs South America	7	866181	A	G	0.807015	PF3D7 0719900 (PF3D7 0719900)	0.09178
East Africa vs South America	8	546841	T	A	0.792576	PF3D7 0810700 (PF3D7 0810700)	0.3744
East Africa vs South America	8	672242	T	A	0.756294	ABCF1 (PF3D7 0813700)	0.47
East Africa vs South America	8	812561	G	A	0.865733	RON5	0.4888
East Africa vs South America	8	812570	C	T	0.867864	RON5	0.4889
East Africa vs South America	8	812667	G	A	0.843707	RON5 (PF3D7 0817700)	0.4691
East Africa vs South America	8	861388	A	G	0.762764	HSP70 (PF3D7 0818900)	0.4176
East Africa vs South America	8	1005851	G	C	0.779721	PF3D7 0822800 (PF3D7 0822800)	0.4911
East Africa vs South America	9	290285	C	T	0.787685	PF3D7 0905800 (PF3D7 0905800)	0.4622
East Africa vs South America	9	290324	G	A	0.751235	PF3D7 0905800 (PF3D7 0905800)	0.4712
East Africa vs South America	9	512326	A	C	0.754764	CRMP1 (PF3D7 0911300)	0.4501
East Africa vs South America	9	828981	A	G	0.754611	PF3D7 0920200 (PF3D7 0920200)	0.1593
East Africa vs South America	10	662320	T	C	0.849955	PF3D7 1016500 (PF3D7 1016500)	0.3245
East Africa vs South America	10	1181683	T	C	0.884989	MTRAP (PF3D7 1028700)	0.468
East Africa vs South America	11	307361	G	A	0.780431	PAIP1 (PF3D7 1107300)	0.1506
East Africa vs South America	11	638299	T	G	0.871752	HSP101 (PF3D7 1116800)	0.4931
East Africa vs South America	11	828596	T	C	0.913937	PF3D7 1121800 (PF3D7 1121800)	0.3175
East Africa vs South America	12	1114059	T	C	0.753326	CYC2 (PF3D7 1227500)	0.4993
East Africa vs South America	13	1879453	T	A	0.814259	P47 (PF3D7 1346800)	0.3506
East Africa vs South America	13	1879488	G	A	0.999303	P47 (PF3D7 1346800)	0.4924
East Africa vs South America	13	2422766	A	G	0.759339	GCbeta (PF3D7 1360500)	0.1615
East Africa vs South America	13	2479113	C	G	0.864668	PF3D7 1361800 (PF3D7 1361800)	0.3359
East Africa vs South America	14	41328	A	T	0.80479	PF3D7 1401100 (PF3D7 1401100)	0.1218
East Africa vs South America	14	1665655	G	T	0.951014	PF3D7 1440800 (PF3D7 1440800)	0.2395
East Africa vs South America	14	1710253	A	T	0.780536	PF3D7 1442200 (PF3D7 1442200)	0.1109
East Africa vs South America	14	2185421	G	T	0.8017	PF3D7 1453200 (PF3D7 1453200)	0.3849
East Africa vs South Asia	3	622763	G	C	0.792278	CTRP (PF3D7 0315200)	0.4009
East Africa vs South Asia	5	1042561	T	G	0.820993	ACS10 (PF3D7 0525100)	0.2959
East Africa vs South Asia	5	1043474	G	T	0.8451	ACS10 (PF3D7 0525100)	0.488
East Africa vs South Asia	9	1178963	G	A	0.781307	RhopH2 (PF3D7 0929400)	0.2924
East Africa vs South Asia	9	1179228	G	A	0.818953	RhopH2 (PF3D7 0929400)	0.374
East Africa vs South Asia	11	638299	T	G	0.947009	HSP101 (PF3D7 1116800)	0.4931
East Africa vs South Asia	13	1879488	G	A	0.851707	P47 (PF3D7 1346800)	0.4924
East Africa vs South Asia	14	2185421	G	T	0.75284	PF3D7 1453200 (PF3D7 1453200)	0.3849
East Africa vs Southeast Asia	1	180379	T	A	0.770572	PF3D7 0104100 (PF3D7 0104100)	0.4388
East Africa vs Southeast Asia	2	623146	T	C	0.94024	PF3D7 0215100 (PF3D7 0215100)	0.4705
East Africa vs Southeast Asia	3	122810	A	G	0.864725	CLAG3.2 (PF3D7 0302200)	0.4943
East Africa vs Southeast Asia	3	361195	G	A	0.777852	PF3D7 0308100 (PF3D7 0308100)	0.4164
East Africa vs Southeast Asia	3	361199	C	T	0.775892	PF3D7 0308100 (PF3D7 0308100)	0.4175
East Africa vs Southeast Asia	3	622763	G	C	0.798486	CTRP (PF3D7 0315200)	0.4009
East Africa vs Southeast Asia	4	1128627	A	T	0.777484	PF3D7 0424900 (PF3D7 0424900)	0.4616
East Africa vs Southeast Asia	5	641205	G	T	0.7986	PF3D7 0515500 (PF3D7 0515500)	0.4807
East Africa vs Southeast Asia	5	1042561	T	G	0.880848	ACS10 (PF3D7 0525100)	0.2959
East Africa vs Southeast Asia	5	1043474	G	T	0.950222	ACS10 (PF3D7 0525100)	0.488
East Africa vs Southeast Asia	6	404679	T	A	0.901374	PF3D7 0609500 (PF3D7 0609500)	0.4538
East Africa vs Southeast Asia	6	531935	G	A	0.763896	PF3D7 0612900 (PF3D7 0612900)	0.4488
East Africa vs Southeast Asia	7	730268	A	C	0.776637	PF3D7 0716700 (PF3D7 0716700)	0.4731
East Africa vs Southeast Asia	8	812561	G	A	0.905013	RON5	0.4888
East Africa vs Southeast Asia	8	812570	C	T	0.905842	RON5	0.4889
East Africa vs Southeast Asia	8	812667	G	A	0.883134	RON5 (PF3D7 0817700)	0.4691
East Africa vs Southeast Asia	8	861388	A	G	0.773665	HSP70 (PF3D7 0818900)	0.4176
East Africa vs Southeast Asia	8	1005851	G	C	0.83618	PF3D7 0822800 (PF3D7 0822800)	0.4911
East Africa vs Southeast Asia	9	631776	C	T	0.757241	PF3D7 0914700 (PF3D7 0914700)	0.4497
East Africa vs Southeast Asia	9	1406576	G	A	0.852091	GIG (PF3D7 0935600)	0.4711
East Africa vs Southeast Asia	10	1181683	T	C	0.844948	MTRAP (PF3D7 1028700)	0.468
East Africa vs Southeast Asia	11	638299	T	G	0.994779	HSP101 (PF3D7 1116800)	0.4931
East Africa vs Southeast Asia	11	1313769	C	T	0.874814	PF3D7 1133900 (PF3D7 1133900)	0.4948
East Africa vs Southeast Asia	12	1114059	T	C	0.804692	CYC2 (PF3D7 1227500)	0.4993
East Africa vs Southeast Asia	12	1394482	A	G	0.81551	AARP1 (PF3D7 1233600)	0.4661
East Africa vs Southeast Asia	13	1697887	T	C	0.770058	PMT (PF3D7 1343000)	0.4451
East Africa vs Southeast Asia	13	1858907	C	T	0.752732	PF3D7 1346400 (PF3D7 1346400)	0.4592
East Africa vs Southeast Asia	13	1879453	T	A	0.814475	P47 (PF3D7 1346800)	0.3506
East Africa vs Southeast Asia	13	1879488	G	A	0.997555	P47 (PF3D7 1346800)	0.4924
East Africa vs Southeast Asia	13	2435370	A	T	0.82121	FLN (PF3D7 1360800)	0.4409
East Africa vs Southeast Asia	14	514157	C	T	0.773009	PF3D7 1412700 (PF3D7 1412700)	0.4782
East Africa vs Southeast Asia	14	683666	G	A	0.758915	PF3D7 1416800 (PF3D7 1416800)	0.4109
East Africa vs Southeast Asia	14	711335	G	A	0.796936	ATG4 (PF3D7 1417300)	0.4891
East Africa vs Southeast Asia	14	922960	A	G	0.81605	PF3D7 1422900 (PF3D7 1422900)	0.497
East Africa vs Southeast Asia	14	1480458	A	T	0.786325	PTEX150 (PF3D7 1436300)	0.3671
East Africa vs Southeast Asia	14	2185421	G	T	0.871705	PF3D7 1453200 (PF3D7 1453200)	0.3849
East Africa vs Southeast Asia	14	2364543	A	T	0.858772	PF3D7 1457600 (PF3D7 1457600)	0.4767
East Africa vs Southeast Asia	14	2695875	T	C	0.788892	PF3D7 1466200 (PF3D7 1466200)	0.4575
East Africa vs Southeast Asia	14	3101577	C	G	0.821515	CRMP4 (PF3D7 1475400)	0.4616
East Africa vs West Africa	9	1178963	G	A	0.756996	RhopH2 (PF3D7 0929400)	0.2924
East Africa vs West Africa	9	1179228	G	A	0.805398	RhopH2 (PF3D7 0929400)	0.374
East Africa vs West Africa	9	1179855	A	C	0.82796	RhopH2 (PF3D7 0929400)	0.3811
East Africa vs West Africa	13	2481108	C	G	0.796327	PF3D7 1361800 (PF3D7 1361800)	0.3507
Oceania vs Central Africa	2	511004	G	A	0.855214	PF3D7 0212500 (PF3D7 0212500)	0.3949
Oceania vs Central Africa	2	623146	T	C	0.960398	PF3D7 0215100 (PF3D7 0215100)	0.4705
Oceania vs Central Africa	3	622763	G	C	0.825055	CTRP (PF3D7 0315200)	0.4009
Oceania vs Central Africa	3	851156	C	T	0.794547	Cap380 (PF3D7 0320400)	0.4239
Oceania vs Central Africa	4	748239	A	T	0.973659	DHFR-TS (PF3D7 0417200)	0.21
Oceania vs Central Africa	5	269459	T	G	0.751009	PF3D7 0506500 (PF3D7 0506500)	0.3725
Oceania vs Central Africa	5	1043474	G	T	0.832086	ACS10 (PF3D7 0525100)	0.488
Oceania vs Central Africa	6	851736	C	T	0.814859	MSP10 (PF3D7 0620400)	0.4696
Oceania vs Central Africa	8	585854	A	C	0.859678	PF3D7 0811600 (PF3D7 0811600)	0.4093
Oceania vs Central Africa	8	672242	T	A	0.780631	ABCF1 (PF3D7 0813700)	0.47
Oceania vs Central Africa	8	812561	G	A	0.922587	RON5	0.4888
Oceania vs Central Africa	8	812570	C	T	0.920327	RON5	0.4889
Oceania vs Central Africa	8	812667	G	A	0.887624	RON5 (PF3D7 0817700)	0.4691
Oceania vs Central Africa	8	846225	G	T	0.823356	PBLP (PF3D7 0818600)	0.4252
Oceania vs Central Africa	8	1005851	G	C	0.782156	PF3D7 0822800 (PF3D7 0822800)	0.4911
Oceania vs Central Africa	9	1406576	G	A	0.84712	GIG (PF3D7 0935600)	0.4711
Oceania vs Central Africa	10	1181683	T	C	0.869157	MTRAP (PF3D7 1028700)	0.468
Oceania vs Central Africa	11	480718	C	T	0.812799	PF3D7 1112600 (PF3D7 1112600)	0.3219
Oceania vs Central Africa	11	638299	T	G	1	HSP101 (PF3D7 1116800)	0.4931
Oceania vs Central Africa	12	1114059	T	C	0.810345	CYC2 (PF3D7 1227500)	0.4993
Oceania vs Central Africa	13	872241	G	A	0.804993	PF3D7 1321100 (PF3D7 1321100)	0.4408
Oceania vs Central Africa	13	1697887	T	C	0.89123	PMT (PF3D7 1343000)	0.4451
Oceania vs Central Africa	13	1700345	T	C	0.845397	PF3D7 1343100 (PF3D7 1343100)	0.3262
Oceania vs Central Africa	13	1858907	C	T	0.824321	PF3D7 1346400 (PF3D7 1346400)	0.4592
Oceania vs Central Africa	13	1879453	T	A	0.782172	P47 (PF3D7 1346800)	0.3506
Oceania vs Central Africa	13	1879488	G	A	0.966514	P47 (PF3D7 1346800)	0.4924
Oceania vs Central Africa	13	2435370	A	T	0.843742	FLN (PF3D7 1360800)	0.4409
Oceania vs Central Africa	14	711335	G	A	0.80053	ATG4 (PF3D7 1417300)	0.4891
Oceania vs Central Africa	14	1666117	T	C	0.785653	PF3D7 1440800 (PF3D7 1440800)	0.3647
Oceania vs Central Africa	14	2364543	A	T	0.836362	PF3D7 1457600 (PF3D7 1457600)	0.4767
Oceania vs Horn of Africa	2	105618	A	T	0.787327	KAHRP	0.4974
Oceania vs Horn of Africa	2	511004	G	A	0.840706	PF3D7 0212500 (PF3D7 0212500)	0.3949
Oceania vs Horn of Africa	3	361195	G	A	0.762133	PF3D7 0308100 (PF3D7 0308100)	0.4164
Oceania vs Horn of Africa	3	361199	C	T	0.762133	PF3D7 0308100 (PF3D7 0308100)	0.4175
Oceania vs Horn of Africa	3	851156	C	T	0.941935	Cap380 (PF3D7 0320400)	0.4239
Oceania vs Horn of Africa	4	329468	A	T	0.892683	Pfs16 (PF3D7 0406200)	0.4913
Oceania vs Horn of Africa	4	748239	A	T	0.932367	DHFR-TS (PF3D7 0417200)	0.21
Oceania vs Horn of Africa	5	419891	A	C	0.862703	PF3D7 0510000	0.3834
Oceania vs Horn of Africa	5	706173	T	A	0.763285	ApiAP2 (PF3D7 0516800)	0.1881
Oceania vs Horn of Africa	5	1042561	T	G	0.775414	ACS10 (PF3D7 0525100)	0.2959
Oceania vs Horn of Africa	5	1043474	G	T	0.888483	ACS10 (PF3D7 0525100)	0.488
Oceania vs Horn of Africa	5	1188542	T	C	0.770775	PF3D7 0529000 (PF3D7 0529000)	0.4327
Oceania vs Horn of Africa	6	261661	A	G	0.75108	PF3D7 0606200 (PF3D7 0606200)	0.4137
Oceania vs Horn of Africa	6	591985	G	T	0.75371	PF3D7 0614100 (PF3D7 0614100)	0.4514
Oceania vs Horn of Africa	6	851736	C	T	0.776777	MSP10 (PF3D7 0620400)	0.4696
Oceania vs Horn of Africa	7	730268	A	C	0.754893	PF3D7 0716700 (PF3D7 0716700)	0.4731
Oceania vs Horn of Africa	8	612596	C	A	0.771905	PF3D7 0812100 (PF3D7 0812100)	0.4925
Oceania vs Horn of Africa	8	812561	G	A	0.92237	RON5	0.4888
Oceania vs Horn of Africa	8	812570	C	T	0.922178	RON5	0.4889
Oceania vs Horn of Africa	8	812667	G	A	0.908879	RON5 (PF3D7 0817700)	0.4691
Oceania vs Horn of Africa	8	1002018	T	C	0.880601	PF3D7 0822700 (PF3D7 0822700)	0.2002
Oceania vs Horn of Africa	8	1005851	G	C	0.805107	PF3D7 0822800 (PF3D7 0822800)	0.4911
Oceania vs Horn of Africa	9	290285	C	T	0.802424	PF3D7 0905800 (PF3D7 0905800)	0.4622
Oceania vs Horn of Africa	9	290324	G	A	0.809474	PF3D7 0905800 (PF3D7 0905800)	0.4712
Oceania vs Horn of Africa	9	512326	A	C	0.927536	CRMP1 (PF3D7 0911300)	0.4501
Oceania vs Horn of Africa	9	512739	G	C	0.898551	CRMP1 (PF3D7 0911300)	0.3466
Oceania vs Horn of Africa	9	516978	G	A	0.870221	CRMP1 (PF3D7 0911300)	0.4444
Oceania vs Horn of Africa	10	1181683	T	C	0.794561	MTRAP (PF3D7 1028700)	0.468
Oceania vs Horn of Africa	11	638299	T	G	0.969849	HSP101 (PF3D7 1116800)	0.4931
Oceania vs Horn of Africa	11	1243999	T	C	0.809732	PF3D7 1132100 (PF3D7 1132100)	0.465
Oceania vs Horn of Africa	11	1977194	G	T	0.761837	PF3D7 1149200 (PF3D7 1149200)	0.1944
Oceania vs Horn of Africa	12	150730	T	C	0.760698	PF3D7 1202600 (PF3D7 1202600)	0.3043
Oceania vs Horn of Africa	13	388365	A	C	0.75419	PF3D7 1308400 (PF3D7 1308400)	0.4107
Oceania vs Horn of Africa	13	1750965	T	A	0.75876	PF3D7 1343800 (PF3D7 1343800)	0.4628
Oceania vs Horn of Africa	13	1766359	C	G	0.853043	PF3D7 1344100 (PF3D7 1344100)	0.4407
Oceania vs Horn of Africa	13	1879453	T	A	0.918609	P47 (PF3D7 1346800)	0.3506
Oceania vs Horn of Africa	13	1879488	G	A	0.966514	P47 (PF3D7 1346800)	0.4924
Oceania vs Horn of Africa	13	2523562	G	A	0.791141	PF3D7 1362800 (PF3D7 1362800)	0.4906
Oceania vs Horn of Africa	14	1106139	C	T	0.754062	PF3D7 1428300 (PF3D7 1428300)	0.3685
Oceania vs Horn of Africa	14	2575660	C	A	0.804729	PF3D7 1463400 (PF3D7 1463400)	0.4715
Oceania vs Horn of Africa	14	2695875	T	C	0.889947	PF3D7 1466200 (PF3D7 1466200)	0.4575
Oceania vs Horn of Africa	14	2715129	T	C	0.763285	ApiAP2 (PF3D7 1466400)	0.1981
Oceania vs Horn of Africa	14	3101577	C	G	0.808677	CRMP4 (PF3D7 1475400)	0.4616
Oceania vs South America	1	239972	G	A	0.770839	PF3D7 0105700 (PF3D7 0105700)	0.3181
Oceania vs South America	2	86870	C	T	0.884528	KAHsp40 (PF3D7 0201800)	0.3324
Oceania vs South America	2	166372	T	C	0.797402	PF3D7 0203600 (PF3D7 0203600)	0.4179
Oceania vs South America	2	468251	G	A	0.808522	PF3D7 0211600 (PF3D7 0211600)	0.2581
Oceania vs South America	2	614624	C	T	0.960061	RON6	0.3229
Oceania vs South America	3	273124	T	C	0.827156	PF3D7 0305500 (PF3D7 0305500)	0.2185
Oceania vs South America	3	510000	G	T	0.95597	PF3D7 0311900 (PF3D7 0311900)	0.3991
Oceania vs South America	3	561220	A	G	0.962996	PF3D7 0313800 (PF3D7 0313800)	0.4563
Oceania vs South America	3	849476	C	T	0.914366	Cap380 (PF3D7 0320400)	0.2944
Oceania vs South America	4	103987	T	C	0.767451	PfD80 (PF3D7 0401800)	0.3339
Oceania vs South America	4	329468	A	T	0.974442	Pfs16 (PF3D7 0406200)	0.4913
Oceania vs South America	4	677644	A	G	0.853188	PF3D7 0415200 (PF3D7 0415200)	0.115
Oceania vs South America	4	748239	A	T	0.914718	DHFR-TS (PF3D7 0417200)	0.21
Oceania vs South America	4	748262	T	C	0.985007	DHFR-TS (PF3D7 0417200)	0.1808
Oceania vs South America	4	797761	A	C	0.856267	PF3D7 0418000 (PF3D7 0418000)	0.2948
Oceania vs South America	4	839310	A	G	0.854242	PF3D7 0418600 (PF3D7 0418600)	0.2204
Oceania vs South America	4	863561	C	T	0.776845	PF3D7 0419400 (PF3D7 0419400)	0.4831
Oceania vs South America	5	376115	C	T	0.823247	PF3D7 0508900 (PF3D7 0508900)	0.3954
Oceania vs South America	5	382974	T	A	0.937712	PF3D7 0509100 (PF3D7 0509100)	0.4427
Oceania vs South America	5	396039	T	C	0.838041	RNAPI (PF3D7 0509400)	0.2596
Oceania vs South America	5	471883	G	A	0.825196	SCD (PF3D7 0511200)	0.2324
Oceania vs South America	5	561244	G	T	0.775859	PF3D7 0513200 (PF3D7 0513200)	0.2825
Oceania vs South America	5	643899	A	G	0.912132	PF3D7 0515500 (PF3D7 0515500)	0.4356
Oceania vs South America	5	679125	C	T	0.886224	PF3D7 0516300 (PF3D7 0516300)	0.3105
Oceania vs South America	5	908826	G	A	0.935084	PF3D7 0522400 (PF3D7 0522400)	0.2865
Oceania vs South America	5	929884	A	G	0.822308	PF3D7 0522400 (PF3D7 0522400)	0.2951
Oceania vs South America	5	930435	C	T	0.953382	PF3D7 0522400 (PF3D7 0522400)	0.4172
Oceania vs South America	5	949158	A	G	0.900356	PF3D7 0522900 (PF3D7 0522900)	0.2287
Oceania vs South America	5	966314	C	A	0.874888	PF3D7 0523200 (PF3D7 0523200)	0.163
Oceania vs South America	5	1042561	T	G	0.841811	ACS10 (PF3D7 0525100)	0.2959
Oceania vs South America	5	1043303	G	A	1	ACS10 (PF3D7 0525100)	0.2836
Oceania vs South America	5	1043474	G	T	0.923896	ACS10 (PF3D7 0525100)	0.488
Oceania vs South America	5	1188542	T	C	0.976012	PF3D7 0529000 (PF3D7 0529000)	0.4327
Oceania vs South America	6	182965	T	C	0.76126	PF3D7 0604300 (PF3D7 0604300)	0.3279
Oceania vs South America	6	377297	A	T	0.788044	PF3D7 0609000 (PF3D7 0609000)	0.2065
Oceania vs South America	6	387083	A	G	0.863504	PF3D7 0609000 (PF3D7 0609000)	0.4691
Oceania vs South America	6	389754	A	G	0.922877	PF3D7 0609100 (PF3D7 0609100)	0.4064
Oceania vs South America	6	417469	A	G	0.894486	PF3D7 0609700 (PF3D7 0609700)	0.4712
Oceania vs South America	6	482969	G	A	0.839961	PF3D7 0611500 (PF3D7 0611500)	0.1406
Oceania vs South America	6	591985	G	T	0.933059	PF3D7 0614100 (PF3D7 0614100)	0.4514
Oceania vs South America	6	627141	T	G	0.815459	PF3D7 0615200 (PF3D7 0615200)	0.295
Oceania vs South America	6	825473	G	T	0.796068	PF3D7 0619600 (PF3D7 0619600)	0.4755
Oceania vs South America	6	851736	C	T	0.912839	MSP10 (PF3D7 0620400)	0.4696
Oceania vs South America	6	851979	A	G	0.831254	MSP10 (PF3D7 0620400)	0.3484
Oceania vs South America	6	1110981	A	G	0.999347	PF3D7 0627700 (PF3D7 0627700)	0.4753
Oceania vs South America	6	1111541	C	T	0.818314	PF3D7 0627700 (PF3D7 0627700)	0.3828
Oceania vs South America	6	1114625	A	C	0.996983	ACS (PF3D7 0627800)	0.4544
Oceania vs South America	6	1114928	A	G	0.996258	ACS (PF3D7 0627800)	0.4704
Oceania vs South America	6	1114951	C	T	0.996928	ACS (PF3D7 0627800)	0.4699
Oceania vs South America	6	1116314	T	C	0.993949	ACS (PF3D7 0627800)	0.4624
Oceania vs South America	6	1117519	A	G	1	ACS (PF3D7 0627800)	0.456
Oceania vs South America	6	1206227	A	T	0.969559	PL (PF3D7 0629300)	0.3303
Oceania vs South America	6	1215233	G	A	0.868626	PF3D7 0629500 (PF3D7 0629500)	0.4207
Oceania vs South America	6	1224777	T	A	0.962519	SET1 (PF3D7 0629700)	0.2436
Oceania vs South America	6	1286801	A	G	0.774741	PF3D7 0630700 (PF3D7 0630700)	0.3004
Oceania vs South America	7	270957	G	A	0.884768	PF3D7 0705500 (PF3D7 0705500)	0.3824
Oceania vs South America	7	375339	A	G	0.913332	PF3D7 0708200 (PF3D7 0708200)	0.3444
Oceania vs South America	7	378669	G	A	0.86353	BUD32 (PF3D7 0708300)	0.2633
Oceania vs South America	7	383166	C	T	0.963317	HSP90	0.3432
Oceania vs South America	7	383527	T	C	0.879639	HSP90	0.1849
Oceania vs South America	7	406231	C	T	0.883906	CRT	0.4237
Oceania vs South America	7	419603	T	A	0.881074	CG2 (PF3D7 0709300)	0.299
Oceania vs South America	7	435413	C	T	0.783037	PF3D7 0709700 (PF3D7 0709700)	0.02794
Oceania vs South America	7	449692	T	A	0.907489	PF3D7 0710000 (PF3D7 0710000)	0.4284
Oceania vs South America	7	449790	T	A	0.894273	PF3D7 0710000 (PF3D7 0710000)	0.4385
Oceania vs South America	7	450016	A	G	0.812463	PF3D7 0710000 (PF3D7 0710000)	0.4157
Oceania vs South America	7	450032	A	G	0.814233	PF3D7 0710000 (PF3D7 0710000)	0.3907
Oceania vs South America	7	450424	G	T	0.850851	PF3D7 0710000 (PF3D7 0710000)	0.3217
Oceania vs South America	7	450854	G	A	0.918199	PF3D7 0710000 (PF3D7 0710000)	0.4374
Oceania vs South America	7	451514	T	C	0.858869	PF3D7 0710000 (PF3D7 0710000)	0.367
Oceania vs South America	7	455798	G	A	0.931715	PF3D7 0710000	0.3187
Oceania vs South America	7	457219	A	G	0.79515	PF3D7 0710000 (PF3D7 0710000)	0.3877
Oceania vs South America	7	464317	G	A	0.970717	PF3D7 0710200 (PF3D7 0710200)	0.4697
Oceania vs South America	7	464353	G	T	0.970631	PF3D7 0710200 (PF3D7 0710200)	0.4737
Oceania vs South America	7	465579	A	G	0.872279	PF3D7 0710200 (PF3D7 0710200)	0.3601
Oceania vs South America	7	465648	T	C	0.872198	PF3D7 0710200 (PF3D7 0710200)	0.346
Oceania vs South America	7	466431	A	T	0.85479	PF3D7 0710200 (PF3D7 0710200)	0.4127
Oceania vs South America	7	635335	G	A	0.754829	PF3D7 0713900 (PF3D7 0713900)	0.4937
Oceania vs South America	7	815129	T	C	0.934901	CRMP2 (PF3D7 0718300)	0.3475
Oceania vs South America	7	816733	A	G	0.996383	CRMP2 (PF3D7 0718300)	0.4299
Oceania vs South America	7	866181	A	G	0.822729	PF3D7 0719900 (PF3D7 0719900)	0.09178
Oceania vs South America	7	1362917	T	A	0.869961	EBA175 (PF3D7 0731500)	0.3505
Oceania vs South America	7	1362925	A	T	0.881646	EBA175 (PF3D7 0731500)	0.3016
Oceania vs South America	8	492502	T	A	0.787051	PF3D7 0809600 (PF3D7 0809600)	0.2773
Oceania vs South America	8	505739	A	G	0.803093	PF3D7 0809800 (PF3D7 0809800)	0.2991
Oceania vs South America	8	585841	C	G	0.76305	PF3D7 0811600 (PF3D7 0811600)	0.4498
Oceania vs South America	8	619138	A	G	0.929053	SSP3 (PF3D7 0812300)	0.454
Oceania vs South America	8	991389	G	T	0.798915	PF3D7 0822400 (PF3D7 0822400)	0.4443
Oceania vs South America	8	1002018	T	C	0.87041	PF3D7 0822700 (PF3D7 0822700)	0.2002
Oceania vs South America	8	1102781	A	T	0.776939	PF3D7 0825700 (PF3D7 0825700)	0.2336
Oceania vs South America	8	1114155	C	T	0.771312	PF3D7 0826100 (PF3D7 0826100)	0.4925
Oceania vs South America	8	1117018	C	T	0.839335	PF3D7 0826100 (PF3D7 0826100)	0.4726
Oceania vs South America	8	1167885	C	T	0.871834	DBP10 (PF3D7 0827000)	0.2631
Oceania vs South America	8	1176457	C	T	0.886913	IF2c (PF3D7 0827100)	0.4629
Oceania vs South America	9	231065	C	A	0.752621	CuTP (PF3D7 0904900)	0.2482
Oceania vs South America	9	283868	A	G	0.847101	WDR66 (PF3D7 0905600)	0.4969
Oceania vs South America	9	492627	C	T	0.945911	ALP5a (PF3D7 0910700)	0.3887
Oceania vs South America	9	512326	A	C	0.989071	CRMP1 (PF3D7 0911300)	0.4501
Oceania vs South America	9	516978	G	A	0.9936	CRMP1 (PF3D7 0911300)	0.4444
Oceania vs South America	9	1005351	G	C	0.765771	PF3D7 0924600 (PF3D7 0924600)	0.4407
Oceania vs South America	9	1015339	T	C	0.841392	PF3D7 0925100 (PF3D7 0925100)	0.254
Oceania vs South America	9	1078816	T	A	0.876231	PF3D7 0926500 (PF3D7 0926500)	0.493
Oceania vs South America	9	1084846	A	C	0.934887	PF3D7 0926600 (PF3D7 0926600)	0.23
Oceania vs South America	9	1406576	G	A	0.86327	GIG (PF3D7 0935600)	0.4711
Oceania vs South America	10	444064	A	G	0.918276	PF3D7 1011500 (PF3D7 1011500)	0.3266
Oceania vs South America	10	658468	C	T	0.856371	FIKK10.1 (PF3D7 1016400)	0.2286
Oceania vs South America	10	662320	T	C	0.999351	PF3D7 1016500 (PF3D7 1016500)	0.3245
Oceania vs South America	10	817457	C	T	0.9016	PF3D7 1020200 (PF3D7 1020200)	0.2634
Oceania vs South America	10	862077	G	C	0.97871	PF3D7 1021300 (PF3D7 1021300)	0.3556
Oceania vs South America	10	1111441	T	C	0.950313	CDC20 (PF3D7 1026400)	0.362
Oceania vs South America	10	1126676	T	C	0.773162	PF3D7 1027000 (PF3D7 1027000)	0.4708
Oceania vs South America	11	307361	G	A	0.906067	PAIP1 (PF3D7 1107300)	0.1506
Oceania vs South America	11	360271	C	T	0.859993	PF3D7 1108100	0.1881
Oceania vs South America	11	480718	C	T	0.896932	PF3D7 1112600 (PF3D7 1112600)	0.3219
Oceania vs South America	11	565295	G	A	0.920099	PF3D7 1114900 (PF3D7 1114900)	0.3378
Oceania vs South America	11	1006784	T	C	0.78903	PF3D7 1125700 (PF3D7 1125700)	0.4857
Oceania vs South America	12	95417	T	A	0.852518	PF3D7 1201400 (PF3D7 1201400)	0.3774
Oceania vs South America	12	836994	T	C	0.955793	SET10 (PF3D7 1221000)	0.3953
Oceania vs South America	12	1162825	A	C	0.918314	MSP9 (PF3D7 1228600)	0.4934
Oceania vs South America	12	1555889	C	G	0.97107	PF3D7 1237200 (PF3D7 1237200)	0.3873
Oceania vs South America	12	2151902	T	C	0.895044	PF3D7 1252600 (PF3D7 1252600)	0.4582
Oceania vs South America	13	301446	C	A	0.809335	PF3D7 1306500 (PF3D7 1306500)	0.4203
Oceania vs South America	13	366999	G	T	0.767206	cpsSII (PF3D7 1308200)	0.1949
Oceania vs South America	13	388365	A	C	0.8385	PF3D7 1308400 (PF3D7 1308400)	0.4107
Oceania vs South America	13	445694	C	T	0.86035	PF3D7 1309800 (PF3D7 1309800)	0.2115
Oceania vs South America	13	639213	A	C	0.770945	PK9 (PF3D7 1315100)	0.4633
Oceania vs South America	13	939344	A	G	0.759399	PF3D7 1322200	0.1949
Oceania vs South America	13	1359289	T	G	0.84893	PF3D7 1333100 (PF3D7 1333100)	0.3268
Oceania vs South America	13	1716321	G	A	0.77265	RAD5 (PF3D7 1343400)	0.307
Oceania vs South America	13	1745544	C	T	0.900646	PF3D7 1343800 (PF3D7 1343800)	0.4156
Oceania vs South America	13	1750965	T	A	0.930408	PF3D7 1343800 (PF3D7 1343800)	0.4628
Oceania vs South America	13	1858907	C	T	0.880559	PF3D7 1346400 (PF3D7 1346400)	0.4592
Oceania vs South America	13	2070556	T	G	0.889739	PF3D7 1352000 (PF3D7 1352000)	0.3288
Oceania vs South America	13	2179835	G	C	0.878158	PF3D7 1354700 (PF3D7 1354700)	0.3946
Oceania vs South America	13	2342841	A	T	0.836927	PF3D7 1359000 (PF3D7 1359000)	0.3689
Oceania vs South America	13	2422766	A	G	0.977217	GCbeta (PF3D7 1360500)	0.1615
Oceania vs South America	13	2479113	C	G	0.983618	PF3D7 1361800 (PF3D7 1361800)	0.3359
Oceania vs South America	13	2523562	G	A	0.947629	PF3D7 1362800 (PF3D7 1362800)	0.4906
Oceania vs South America	14	41328	A	T	0.859145	PF3D7 1401100 (PF3D7 1401100)	0.1218
Oceania vs South America	14	337415	T	C	0.81205	PF3D7 1408700 (PF3D7 1408700)	0.4096
Oceania vs South America	14	420628	A	G	0.95917	RAP1 (PF3D7 1410400)	0.1839
Oceania vs South America	14	478047	G	C	0.782914	PF3D7 1411800 (PF3D7 1411800)	0.2412
Oceania vs South America	14	673692	T	C	0.756608	PF3D7 1416600 (PF3D7 1416600)	0.1089
Oceania vs South America	14	911819	G	C	0.89078	PF3D7 1422600 (PF3D7 1422600)	0.3623
Oceania vs South America	14	922960	A	G	0.823651	PF3D7 1422900 (PF3D7 1422900)	0.497
Oceania vs South America	14	1307328	A	G	0.867241	PF3D7 1433200 (PF3D7 1433200)	0.2984
Oceania vs South America	14	1393032	C	T	0.844466	PF3D7 1434500 (PF3D7 1434500)	0.4632
Oceania vs South America	14	1438616	T	C	0.901345	PF3D7 1435600 (PF3D7 1435600)	0.4912
Oceania vs South America	14	1665655	G	T	1	PF3D7 1440800 (PF3D7 1440800)	0.2395
Oceania vs South America	14	1666117	T	C	0.99854	PF3D7 1440800 (PF3D7 1440800)	0.3647
Oceania vs South America	14	1710253	A	T	0.842538	PF3D7 1442200 (PF3D7 1442200)	0.1109
Oceania vs South America	14	1748662	G	T	0.906939	PF3D7 1442700 (PF3D7 1442700)	0.4921
Oceania vs South America	14	1770207	T	C	0.854875	PF3D7 1443100 (PF3D7 1443100)	0.1937
Oceania vs South America	14	1819017	T	C	0.775383	PF3D7 1444100 (PF3D7 1444100)	0.346
Oceania vs South America	14	2733656	C	T	0.877842	PF3D7 1466800 (PF3D7 1466800)	0.4186
Oceania vs South America	14	2763591	C	T	0.857915	PF3D7 1467600 (PF3D7 1467600)	0.4616
Oceania vs South America	14	2764134	T	C	0.851252	PF3D7 1467600 (PF3D7 1467600)	0.3458
Oceania vs South America	14	2845773	A	G	0.94872	NT3 (PF3D7 1469400)	0.4808
Oceania vs South America	14	3017880	T	C	0.789558	PF3D7 1474000 (PF3D7 1474000)	0.1069
Oceania vs South Asia	3	751699	T	A	0.823902	RPB1 (PF3D7 0318200)	0.4745
Oceania vs South Asia	7	403337	G	T	0.876586	CRT	0.3022
Oceania vs South Asia	7	404836	C	G	0.832093	CRT (PF3D7 0709000)	0.4596
Oceania vs South Asia	7	435413	C	T	0.779864	PF3D7 0709700 (PF3D7 0709700)	0.02794
Oceania vs South Central Africa	2	511004	G	A	0.867641	PF3D7 0212500 (PF3D7 0212500)	0.3949
Oceania vs South Central Africa	2	623146	T	C	0.907841	PF3D7 0215100 (PF3D7 0215100)	0.4705
Oceania vs South Central Africa	3	350173	C	G	0.759883	PF3D7 0307900 (PF3D7 0307900)	0.4115
Oceania vs South Central Africa	3	561220	A	G	0.798851	PF3D7 0313800 (PF3D7 0313800)	0.4563
Oceania vs South Central Africa	3	622763	G	C	0.799386	CTRP (PF3D7 0315200)	0.4009
Oceania vs South Central Africa	3	851156	C	T	0.795678	Cap380 (PF3D7 0320400)	0.4239
Oceania vs South Central Africa	4	748239	A	T	0.942801	DHFR-TS (PF3D7 0417200)	0.21
Oceania vs South Central Africa	5	1042561	T	G	0.798298	ACS10 (PF3D7 0525100)	0.2959
Oceania vs South Central Africa	5	1043474	G	T	0.876414	ACS10 (PF3D7 0525100)	0.488
Oceania vs South Central Africa	6	404679	T	A	0.77057	PF3D7 0609500 (PF3D7 0609500)	0.4538
Oceania vs South Central Africa	6	1110981	A	G	0.777996	PF3D7 0627700 (PF3D7 0627700)	0.4753
Oceania vs South Central Africa	6	1117519	A	G	0.762279	ACS (PF3D7 0627800)	0.456
Oceania vs South Central Africa	7	403625	A	C	0.950073	CRT (PF3D7 0709000)	0.3507
Oceania vs South Central Africa	7	404407	G	T	0.946237	CRT (PF3D7 0709000)	0.3652
Oceania vs South Central Africa	7	730268	A	C	0.847749	PF3D7 0716700 (PF3D7 0716700)	0.4731
Oceania vs South Central Africa	8	672242	T	A	0.792648	ABCF1 (PF3D7 0813700)	0.47
Oceania vs South Central Africa	8	812561	G	A	0.910926	RON5	0.4888
Oceania vs South Central Africa	8	812570	C	T	0.91073	RON5	0.4889
Oceania vs South Central Africa	8	812667	G	A	0.89661	RON5 (PF3D7 0817700)	0.4691
Oceania vs South Central Africa	8	846225	G	T	0.788955	PBLP (PF3D7 0818600)	0.4252
Oceania vs South Central Africa	8	861388	A	G	0.809416	HSP70 (PF3D7 0818900)	0.4176
Oceania vs South Central Africa	8	1002018	T	C	0.867688	PF3D7 0822700 (PF3D7 0822700)	0.2002
Oceania vs South Central Africa	8	1005851	G	C	0.841725	PF3D7 0822800 (PF3D7 0822800)	0.4911
Oceania vs South Central Africa	9	127644	G	A	0.774678	PF3D7 0902900 (PF3D7 0902900)	0.3612
Oceania vs South Central Africa	9	290324	G	A	0.754178	PF3D7 0905800 (PF3D7 0905800)	0.4712
Oceania vs South Central Africa	9	1406576	G	A	0.902134	GIG (PF3D7 0935600)	0.4711
Oceania vs South Central Africa	10	1181683	T	C	0.929234	MTRAP (PF3D7 1028700)	0.468
Oceania vs South Central Africa	11	480718	C	T	0.821598	PF3D7 1112600 (PF3D7 1112600)	0.3219
Oceania vs South Central Africa	11	638299	T	G	0.998035	HSP101 (PF3D7 1116800)	0.4931
Oceania vs South Central Africa	12	1114059	T	C	0.776451	CYC2 (PF3D7 1227500)	0.4993
Oceania vs South Central Africa	13	872241	G	A	0.817339	PF3D7 1321100 (PF3D7 1321100)	0.4408
Oceania vs South Central Africa	13	1697887	T	C	0.798671	PMT (PF3D7 1343000)	0.4451
Oceania vs South Central Africa	13	1700345	T	C	0.839096	PF3D7 1343100 (PF3D7 1343100)	0.3262
Oceania vs South Central Africa	13	1858907	C	T	0.776605	PF3D7 1346400 (PF3D7 1346400)	0.4592
Oceania vs South Central Africa	13	1879453	T	A	0.772186	P47 (PF3D7 1346800)	0.3506
Oceania vs South Central Africa	13	1879488	G	A	0.966514	P47 (PF3D7 1346800)	0.4924
Oceania vs South Central Africa	13	2435370	A	T	0.86258	FLN (PF3D7 1360800)	0.4409
Oceania vs South Central Africa	14	711335	G	A	0.853313	ATG4 (PF3D7 1417300)	0.4891
Oceania vs South Central Africa	14	1666117	T	C	0.88623	PF3D7 1440800 (PF3D7 1440800)	0.3647
Oceania vs South Central Africa	14	2364543	A	T	0.802845	PF3D7 1457600 (PF3D7 1457600)	0.4767
Oceania vs Southeast Asia	4	748239	A	T	0.884172	DHFR-TS (PF3D7 0417200)	0.21
Oceania vs Southeast Asia	5	641205	G	T	0.844983	PF3D7 0515500 (PF3D7 0515500)	0.4807
Oceania vs Southeast Asia	7	385921	C	T	0.913899	PF3D7 0708500 (PF3D7 0708500)	0.4956
Oceania vs Southeast Asia	7	403337	G	T	0.946892	CRT	0.3022
Oceania vs Southeast Asia	7	404836	C	G	0.966822	CRT (PF3D7 0709000)	0.4596
Oceania vs Southeast Asia	7	406231	C	T	0.976193	CRT	0.4237
Oceania vs Southeast Asia	7	410036	A	G	0.93483	PF3D7 0709100 (PF3D7 0709100)	0.4346
Oceania vs Southeast Asia	7	435413	C	T	0.784854	PF3D7 0709700 (PF3D7 0709700)	0.02794
Oceania vs Southeast Asia	8	546841	T	A	0.809362	PF3D7 0810700 (PF3D7 0810700)	0.3744
South America vs Central Africa	2	306156	T	C	0.756146	SERA5 (PF3D7 0207600)	0.4526
South America vs Central Africa	2	511004	G	A	0.849892	PF3D7 0212500 (PF3D7 0212500)	0.3949
South America vs Central Africa	2	623146	T	C	0.83511	PF3D7 0215100 (PF3D7 0215100)	0.4705
South America vs Central Africa	3	622763	G	C	0.835682	CTRP (PF3D7 0315200)	0.4009
South America vs Central Africa	4	748262	T	C	0.814021	DHFR-TS (PF3D7 0417200)	0.1808
South America vs Central Africa	5	1043303	G	A	0.867575	ACS10 (PF3D7 0525100)	0.2836
South America vs Central Africa	6	404679	T	A	0.750999	PF3D7 0609500 (PF3D7 0609500)	0.4538
South America vs Central Africa	6	1206227	A	T	0.762415	PL (PF3D7 0629300)	0.3303
South America vs Central Africa	6	1215233	G	A	0.869383	PF3D7 0629500 (PF3D7 0629500)	0.4207
South America vs Central Africa	6	1224777	T	A	0.867575	SET1 (PF3D7 0629700)	0.2436
South America vs Central Africa	7	866181	A	G	0.775447	PF3D7 0719900 (PF3D7 0719900)	0.09178
South America vs Central Africa	8	585841	C	G	0.819077	PF3D7 0811600 (PF3D7 0811600)	0.4498
South America vs Central Africa	8	672242	T	A	0.807867	ABCF1 (PF3D7 0813700)	0.47
South America vs Central Africa	8	812561	G	A	0.886062	RON5	0.4888
South America vs Central Africa	8	812570	C	T	0.884613	RON5	0.4889
South America vs Central Africa	8	812667	G	A	0.850616	RON5 (PF3D7 0817700)	0.4691
South America vs Central Africa	8	1005851	G	C	0.756156	PF3D7 0822800 (PF3D7 0822800)	0.4911
South America vs Central Africa	9	290285	C	T	0.771943	PF3D7 0905800 (PF3D7 0905800)	0.4622
South America vs Central Africa	10	1181683	T	C	0.807095	MTRAP (PF3D7 1028700)	0.468
South America vs Central Africa	11	307361	G	A	0.761608	PAIP1 (PF3D7 1107300)	0.1506
South America vs Central Africa	11	638299	T	G	0.874872	HSP101 (PF3D7 1116800)	0.4931
South America vs Central Africa	11	828596	T	C	0.915598	PF3D7 1121800 (PF3D7 1121800)	0.3175
South America vs Central Africa	12	1114059	T	C	0.776906	CYC2 (PF3D7 1227500)	0.4993
South America vs Central Africa	13	1879453	T	A	0.822947	P47 (PF3D7 1346800)	0.3506
South America vs Central Africa	13	1879488	G	A	0.999303	P47 (PF3D7 1346800)	0.4924
South America vs Central Africa	13	2422766	A	G	0.760201	GCbeta (PF3D7 1360500)	0.1615
South America vs Central Africa	13	2479113	C	G	0.765467	PF3D7 1361800 (PF3D7 1361800)	0.3359
South America vs Central Africa	14	41328	A	T	0.786799	PF3D7 1401100 (PF3D7 1401100)	0.1218
South America vs Central Africa	14	1710253	A	T	0.789511	PF3D7 1442200 (PF3D7 1442200)	0.1109
South America vs Central Africa	14	2185421	G	T	0.779745	PF3D7 1453200 (PF3D7 1453200)	0.3849
South America vs Horn of Africa	2	511004	G	A	0.835267	PF3D7 0212500 (PF3D7 0212500)	0.3949
South America vs Horn of Africa	4	677644	A	G	0.863807	PF3D7 0415200 (PF3D7 0415200)	0.115
South America vs Horn of Africa	4	683888	G	A	0.808378	CRK3 (PF3D7 0415300)	0.1523
South America vs Horn of Africa	5	966314	C	A	0.764983	PF3D7 0523200 (PF3D7 0523200)	0.163
South America vs Horn of Africa	5	1043303	G	A	0.857923	ACS10 (PF3D7 0525100)	0.2836
South America vs Horn of Africa	6	261661	A	G	0.766475	PF3D7 0606200 (PF3D7 0606200)	0.4137
South America vs Horn of Africa	6	389754	A	G	0.802636	PF3D7 0609100 (PF3D7 0609100)	0.4064
South America vs Horn of Africa	6	404679	T	A	0.752354	PF3D7 0609500 (PF3D7 0609500)	0.4538
South America vs Horn of Africa	6	482969	G	A	0.826013	PF3D7 0611500 (PF3D7 0611500)	0.1406
South America vs Horn of Africa	6	1206227	A	T	0.769634	PL (PF3D7 0629300)	0.3303
South America vs Horn of Africa	6	1215233	G	A	0.876615	PF3D7 0629500 (PF3D7 0629500)	0.4207
South America vs Horn of Africa	6	1224777	T	A	0.916256	SET1 (PF3D7 0629700)	0.2436
South America vs Horn of Africa	6	1289212	A	G	0.807039	PF3D7 0630800 (PF3D7 0630800)	0.4627
South America vs Horn of Africa	7	375339	A	G	0.752914	PF3D7 0708200 (PF3D7 0708200)	0.3444
South America vs Horn of Africa	7	410036	A	G	0.768716	PF3D7 0709100 (PF3D7 0709100)	0.4346
South America vs Horn of Africa	7	455798	G	A	0.851852	PF3D7 0710000	0.3187
South America vs Horn of Africa	7	866181	A	G	0.791513	PF3D7 0719900 (PF3D7 0719900)	0.09178
South America vs Horn of Africa	7	1149505	C	T	0.805591	VPS53 (PF3D7 0727000)	0.3538
South America vs Horn of Africa	8	492502	T	A	0.763623	PF3D7 0809600 (PF3D7 0809600)	0.2773
South America vs Horn of Africa	8	612596	C	A	0.77893	PF3D7 0812100 (PF3D7 0812100)	0.4925
South America vs Horn of Africa	8	812561	G	A	0.885837	RON5	0.4888
South America vs Horn of Africa	8	812570	C	T	0.886581	RON5	0.4889
South America vs Horn of Africa	8	812667	G	A	0.873129	RON5 (PF3D7 0817700)	0.4691
South America vs Horn of Africa	8	1005851	G	C	0.779867	PF3D7 0822800 (PF3D7 0822800)	0.4911
South America vs Horn of Africa	9	290285	C	T	0.848124	PF3D7 0905800 (PF3D7 0905800)	0.4622
South America vs Horn of Africa	9	290324	G	A	0.81309	PF3D7 0905800 (PF3D7 0905800)	0.4712
South America vs Horn of Africa	9	512739	G	C	0.851321	CRMP1 (PF3D7 0911300)	0.3466
South America vs Horn of Africa	9	661525	G	T	0.843922	PF3D7 0915700 (PF3D7 0915700)	0.3776
South America vs Horn of Africa	9	828981	A	G	0.777321	PF3D7 0920200 (PF3D7 0920200)	0.1593
South America vs Horn of Africa	9	1112623	A	G	0.853997	PF3D7 0927200 (PF3D7 0927200)	0.3887
South America vs Horn of Africa	10	341106	A	G	0.771914	PF3D7 1008100 (PF3D7 1008100)	0.3281
South America vs Horn of Africa	10	444064	A	G	0.781726	PF3D7 1011500 (PF3D7 1011500)	0.3266
South America vs Horn of Africa	10	662320	T	C	0.79096	PF3D7 1016500 (PF3D7 1016500)	0.3245
South America vs Horn of Africa	10	1384253	A	G	0.832165	MRScyt (PF3D7 1034900)	0.4717
South America vs Horn of Africa	10	1391795	G	A	0.789151	PF3D7 1035100 (PF3D7 1035100)	0.405
South America vs Horn of Africa	11	307361	G	A	0.856387	PAIP1 (PF3D7 1107300)	0.1506
South America vs Horn of Africa	11	638299	T	G	0.83726	HSP101 (PF3D7 1116800)	0.4931
South America vs Horn of Africa	11	828596	T	C	0.901595	PF3D7 1121800 (PF3D7 1121800)	0.3175
South America vs Horn of Africa	13	1404127	G	T	0.809772	MSRP4 (PF3D7 1334400)	0.3268
South America vs Horn of Africa	13	1879453	T	A	0.951751	P47 (PF3D7 1346800)	0.3506
South America vs Horn of Africa	13	1879488	G	A	0.999303	P47 (PF3D7 1346800)	0.4924
South America vs Horn of Africa	13	2422766	A	G	0.957495	GCbeta (PF3D7 1360500)	0.1615
South America vs Horn of Africa	14	41328	A	T	0.818573	PF3D7 1401100 (PF3D7 1401100)	0.1218
South America vs Horn of Africa	14	237338	G	C	0.824327	WDR65 (PF3D7 1406500)	0.4669
South America vs Horn of Africa	14	1665655	G	T	0.95122	PF3D7 1440800 (PF3D7 1440800)	0.2395
South America vs Horn of Africa	14	1710253	A	T	0.81458	PF3D7 1442200 (PF3D7 1442200)	0.1109
South America vs Horn of Africa	14	2845773	A	G	0.753769	NT3 (PF3D7 1469400)	0.4808
South America vs Horn of Africa	14	3017880	T	C	0.775859	PF3D7 1474000 (PF3D7 1474000)	0.1069
South America vs South Asia	2	86870	C	T	0.818266	KAHsp40 (PF3D7 0201800)	0.3324
South America vs South Asia	2	166372	T	C	0.797058	PF3D7 0203600 (PF3D7 0203600)	0.4179
South America vs South Asia	2	614624	C	T	0.823205	RON6	0.3229
South America vs South Asia	3	273124	T	C	0.76831	PF3D7 0305500 (PF3D7 0305500)	0.2185
South America vs South Asia	3	510000	G	T	0.85345	PF3D7 0311900 (PF3D7 0311900)	0.3991
South America vs South Asia	3	751699	T	A	0.828614	RPB1 (PF3D7 0318200)	0.4745
South America vs South Asia	3	849476	C	T	0.890998	Cap380 (PF3D7 0320400)	0.2944
South America vs South Asia	4	329468	A	T	0.903907	Pfs16 (PF3D7 0406200)	0.4913
South America vs South Asia	4	677644	A	G	0.866	PF3D7 0415200 (PF3D7 0415200)	0.115
South America vs South Asia	4	748262	T	C	0.921537	DHFR-TS (PF3D7 0417200)	0.1808
South America vs South Asia	4	757119	A	G	0.836012	PF3D7 0417400 (PF3D7 0417400)	0.3289
South America vs South Asia	4	797761	A	C	0.833232	PF3D7 0418000 (PF3D7 0418000)	0.2948
South America vs South Asia	4	839310	A	G	0.805237	PF3D7 0418600 (PF3D7 0418600)	0.2204
South America vs South Asia	5	396039	T	C	0.756971	RNAPI (PF3D7 0509400)	0.2596
South America vs South Asia	5	471883	G	A	0.775811	SCD (PF3D7 0511200)	0.2324
South America vs South Asia	5	643899	A	G	0.850817	PF3D7 0515500 (PF3D7 0515500)	0.4356
South America vs South Asia	5	908826	G	A	0.780412	PF3D7 0522400 (PF3D7 0522400)	0.2865
South America vs South Asia	5	929884	A	G	0.768975	PF3D7 0522400 (PF3D7 0522400)	0.2951
South America vs South Asia	5	949158	A	G	0.844033	PF3D7 0522900 (PF3D7 0522900)	0.2287
South America vs South Asia	5	958440	A	T	0.823781	MDR1 (PF3D7 0523000)	0.4684
South America vs South Asia	5	966314	C	A	0.819796	PF3D7 0523200 (PF3D7 0523200)	0.163
South America vs South Asia	5	1042561	T	G	0.875496	ACS10 (PF3D7 0525100)	0.2959
South America vs South Asia	5	1043303	G	A	0.92	ACS10 (PF3D7 0525100)	0.2836
South America vs South Asia	5	1043474	G	T	0.894943	ACS10 (PF3D7 0525100)	0.488
South America vs South Asia	5	1188542	T	C	0.964484	PF3D7 0529000 (PF3D7 0529000)	0.4327
South America vs South Asia	6	482969	G	A	0.827951	PF3D7 0611500 (PF3D7 0611500)	0.1406
South America vs South Asia	6	851736	C	T	0.752081	MSP10 (PF3D7 0620400)	0.4696
South America vs South Asia	6	1110981	A	G	0.998701	PF3D7 0627700 (PF3D7 0627700)	0.4753
South America vs South Asia	6	1111541	C	T	0.881479	PF3D7 0627700 (PF3D7 0627700)	0.3828
South America vs South Asia	6	1114625	A	C	0.961098	ACS (PF3D7 0627800)	0.4544
South America vs South Asia	6	1114928	A	G	0.991447	ACS (PF3D7 0627800)	0.4704
South America vs South Asia	6	1114951	C	T	0.991801	ACS (PF3D7 0627800)	0.4699
South America vs South Asia	6	1116314	T	C	0.990799	ACS (PF3D7 0627800)	0.4624
South America vs South Asia	6	1117519	A	G	0.998009	ACS (PF3D7 0627800)	0.456
South America vs South Asia	6	1206227	A	T	0.834251	PL (PF3D7 0629300)	0.3303
South America vs South Asia	6	1224777	T	A	0.92496	SET1 (PF3D7 0629700)	0.2436
South America vs South Asia	7	270957	G	A	0.788994	PF3D7 0705500 (PF3D7 0705500)	0.3824
South America vs South Asia	7	383166	C	T	0.855653	HSP90	0.3432
South America vs South Asia	7	383527	T	C	0.864455	HSP90	0.1849
South America vs South Asia	7	403337	G	T	0.791799	CRT	0.3022
South America vs South Asia	7	404836	C	G	0.832093	CRT (PF3D7 0709000)	0.4596
South America vs South Asia	7	455798	G	A	0.830794	PF3D7 0710000	0.3187
South America vs South Asia	7	815129	T	C	0.846829	CRMP2 (PF3D7 0718300)	0.3475
South America vs South Asia	7	866181	A	G	0.822729	PF3D7 0719900 (PF3D7 0719900)	0.09178
South America vs South Asia	7	1362925	A	T	0.764706	EBA175 (PF3D7 0731500)	0.3016
South America vs South Asia	8	489611	A	T	0.848158	PF3D7 0809600 (PF3D7 0809600)	0.2728
South America vs South Asia	9	231065	C	A	0.789191	CuTP (PF3D7 0904900)	0.2482
South America vs South Asia	9	492627	C	T	0.886744	ALP5a (PF3D7 0910700)	0.3887
South America vs South Asia	9	512326	A	C	0.770578	CRMP1 (PF3D7 0911300)	0.4501
South America vs South Asia	9	516978	G	A	0.867044	CRMP1 (PF3D7 0911300)	0.4444
South America vs South Asia	9	828981	A	G	0.762622	PF3D7 0920200 (PF3D7 0920200)	0.1593
South America vs South Asia	9	1015339	T	C	0.778092	PF3D7 0925100 (PF3D7 0925100)	0.254
South America vs South Asia	9	1078816	T	A	0.787176	PF3D7 0926500 (PF3D7 0926500)	0.493
South America vs South Asia	9	1084846	A	C	0.830781	PF3D7 0926600 (PF3D7 0926600)	0.23
South America vs South Asia	10	444064	A	G	0.871811	PF3D7 1011500 (PF3D7 1011500)	0.3266
South America vs South Asia	10	662320	T	C	0.954439	PF3D7 1016500 (PF3D7 1016500)	0.3245
South America vs South Asia	10	817457	C	T	0.763766	PF3D7 1020200 (PF3D7 1020200)	0.2634
South America vs South Asia	10	862077	G	C	0.905616	PF3D7 1021300 (PF3D7 1021300)	0.3556
South America vs South Asia	10	1111441	T	C	0.836377	CDC20 (PF3D7 1026400)	0.362
South America vs South Asia	11	307361	G	A	0.892608	PAIP1 (PF3D7 1107300)	0.1506
South America vs South Asia	11	565295	G	A	0.829688	PF3D7 1114900 (PF3D7 1114900)	0.3378
South America vs South Asia	11	1006784	T	C	0.805697	PF3D7 1125700 (PF3D7 1125700)	0.4857
South America vs South Asia	12	95417	T	A	0.754934	PF3D7 1201400 (PF3D7 1201400)	0.3774
South America vs South Asia	12	836994	T	C	0.852151	SET10 (PF3D7 1221000)	0.3953
South America vs South Asia	12	1162825	A	C	0.864348	MSP9 (PF3D7 1228600)	0.4934
South America vs South Asia	13	366999	G	T	0.809311	cpsSII (PF3D7 1308200)	0.1949
South America vs South Asia	13	445694	C	T	0.799244	PF3D7 1309800 (PF3D7 1309800)	0.2115
South America vs South Asia	13	1466351	G	A	0.8114	TRAP (PF3D7 1335900)	0.3763
South America vs South Asia	13	2179835	G	C	0.817845	PF3D7 1354700 (PF3D7 1354700)	0.3946
South America vs South Asia	13	2422766	A	G	0.951678	GCbeta (PF3D7 1360500)	0.1615
South America vs South Asia	13	2479113	C	G	0.955542	PF3D7 1361800 (PF3D7 1361800)	0.3359
South America vs South Asia	14	41328	A	T	0.787672	PF3D7 1401100 (PF3D7 1401100)	0.1218
South America vs South Asia	14	420628	A	G	0.944446	RAP1 (PF3D7 1410400)	0.1839
South America vs South Asia	14	673692	T	C	0.752234	PF3D7 1416600 (PF3D7 1416600)	0.1089
South America vs South Asia	14	922960	A	G	0.793788	PF3D7 1422900 (PF3D7 1422900)	0.497
South America vs South Asia	14	1562642	T	A	0.814456	PF3D7 1438600 (PF3D7 1438600)	0.4934
South America vs South Asia	14	1665655	G	T	0.943317	PF3D7 1440800 (PF3D7 1440800)	0.2395
South America vs South Asia	14	1666117	T	C	0.879227	PF3D7 1440800 (PF3D7 1440800)	0.3647
South America vs South Asia	14	1710253	A	T	0.847361	PF3D7 1442200 (PF3D7 1442200)	0.1109
South America vs South Asia	14	1770207	T	C	0.808087	PF3D7 1443100 (PF3D7 1443100)	0.1937
South America vs South Asia	14	3017880	T	C	0.777213	PF3D7 1474000 (PF3D7 1474000)	0.1069
South America vs South Asia	14	3126183	T	C	0.767264	PF3D7 1475900 (PF3D7 1475900)	0.1439
South America vs South Central Africa	2	511004	G	A	0.86242	PF3D7 0212500 (PF3D7 0212500)	0.3949
South America vs South Central Africa	2	623146	T	C	0.770823	PF3D7 0215100 (PF3D7 0215100)	0.4705
South America vs South Central Africa	3	622763	G	C	0.810408	CTRP (PF3D7 0315200)	0.4009
South America vs South Central Africa	3	849476	C	T	0.797382	Cap380 (PF3D7 0320400)	0.2944
South America vs South Central Africa	4	677644	A	G	0.833019	PF3D7 0415200 (PF3D7 0415200)	0.115
South America vs South Central Africa	4	748262	T	C	0.929273	DHFR-TS (PF3D7 0417200)	0.1808
South America vs South Central Africa	5	966314	C	A	0.753569	PF3D7 0523200 (PF3D7 0523200)	0.163
South America vs South Central Africa	5	1043303	G	A	0.925344	ACS10 (PF3D7 0525100)	0.2836
South America vs South Central Africa	6	404679	T	A	0.793689	PF3D7 0609500 (PF3D7 0609500)	0.4538
South America vs South Central Africa	7	403625	A	C	0.997725	CRT (PF3D7 0709000)	0.3507
South America vs South Central Africa	7	404407	G	T	0.998669	CRT (PF3D7 0709000)	0.3652
South America vs South Central Africa	7	620660	T	A	0.752456	PF3D7 0713600 (PF3D7 0713600)	0.2945
South America vs South Central Africa	7	866181	A	G	0.788244	PF3D7 0719900 (PF3D7 0719900)	0.09178
South America vs South Central Africa	8	672242	T	A	0.819443	ABCF1 (PF3D7 0813700)	0.47
South America vs South Central Africa	8	812561	G	A	0.873681	RON5	0.4888
South America vs South Central Africa	8	812570	C	T	0.874439	RON5	0.4889
South America vs South Central Africa	8	812667	G	A	0.860132	RON5 (PF3D7 0817700)	0.4691
South America vs South Central Africa	8	861388	A	G	0.769392	HSP70 (PF3D7 0818900)	0.4176
South America vs South Central Africa	8	1005851	G	C	0.817728	PF3D7 0822800 (PF3D7 0822800)	0.4911
South America vs South Central Africa	9	290285	C	T	0.797095	PF3D7 0905800 (PF3D7 0905800)	0.4622
South America vs South Central Africa	9	290324	G	A	0.758056	PF3D7 0905800 (PF3D7 0905800)	0.4712
South America vs South Central Africa	9	492627	C	T	0.755496	ALP5a (PF3D7 0910700)	0.3887
South America vs South Central Africa	9	512326	A	C	0.798377	CRMP1 (PF3D7 0911300)	0.4501
South America vs South Central Africa	9	1178963	G	A	0.764664	RhopH2 (PF3D7 0929400)	0.2924
South America vs South Central Africa	10	662320	T	C	0.834107	PF3D7 1016500 (PF3D7 1016500)	0.3245
South America vs South Central Africa	10	1181683	T	C	0.872892	MTRAP (PF3D7 1028700)	0.468
South America vs South Central Africa	11	307361	G	A	0.782015	PAIP1 (PF3D7 1107300)	0.1506
South America vs South Central Africa	11	638299	T	G	0.872416	HSP101 (PF3D7 1116800)	0.4931
South America vs South Central Africa	11	828596	T	C	0.903943	PF3D7 1121800 (PF3D7 1121800)	0.3175
South America vs South Central Africa	13	1879453	T	A	0.813505	P47 (PF3D7 1346800)	0.3506
South America vs South Central Africa	13	1879488	G	A	0.999303	P47 (PF3D7 1346800)	0.4924
South America vs South Central Africa	13	2422766	A	G	0.75012	GCbeta (PF3D7 1360500)	0.1615
South America vs South Central Africa	13	2479113	C	G	0.943041	PF3D7 1361800 (PF3D7 1361800)	0.3359
South America vs South Central Africa	14	41328	A	T	0.803721	PF3D7 1401100 (PF3D7 1401100)	0.1218
South America vs South Central Africa	14	1665655	G	T	0.897839	PF3D7 1440800 (PF3D7 1440800)	0.2395
South America vs South Central Africa	14	1710253	A	T	0.754969	PF3D7 1442200 (PF3D7 1442200)	0.1109
South America vs South Central Africa	14	2185421	G	T	0.809343	PF3D7 1453200 (PF3D7 1453200)	0.3849
South Asia vs Central Africa	3	622763	G	C	0.836193	CTRP (PF3D7 0315200)	0.4009
South Asia vs Central Africa	3	851156	C	T	0.760551	Cap380 (PF3D7 0320400)	0.4239
South Asia vs Central Africa	5	1043474	G	T	0.798671	ACS10 (PF3D7 0525100)	0.488
South Asia vs Central Africa	8	585854	A	C	0.776611	PF3D7 0811600 (PF3D7 0811600)	0.4093
South Asia vs Central Africa	11	638299	T	G	0.949755	HSP101 (PF3D7 1116800)	0.4931
South Asia vs Central Africa	13	872241	G	A	0.76911	PF3D7 1321100 (PF3D7 1321100)	0.4408
South Asia vs Central Africa	13	1879488	G	A	0.851707	P47 (PF3D7 1346800)	0.4924
South Asia vs Central Africa	13	2435370	A	T	0.78174	FLN (PF3D7 1360800)	0.4409
South Asia vs Central Africa	14	1480458	A	T	0.809269	PTEX150 (PF3D7 1436300)	0.3671
South Asia vs Horn of Africa	3	851156	C	T	0.914954	Cap380 (PF3D7 0320400)	0.4239
South Asia vs Horn of Africa	4	329468	A	T	0.811442	Pfs16 (PF3D7 0406200)	0.4913
South Asia vs Horn of Africa	5	1042561	T	G	0.812285	ACS10 (PF3D7 0525100)	0.2959
South Asia vs Horn of Africa	5	1043474	G	T	0.857772	ACS10 (PF3D7 0525100)	0.488
South Asia vs Horn of Africa	5	1188542	T	C	0.754872	PF3D7 0529000 (PF3D7 0529000)	0.4327
South Asia vs Horn of Africa	9	1179228	G	A	0.861157	RhopH2 (PF3D7 0929400)	0.374
South Asia vs Horn of Africa	11	638299	T	G	0.916592	HSP101 (PF3D7 1116800)	0.4931
South Asia vs Horn of Africa	13	1879453	T	A	0.824538	P47 (PF3D7 1346800)	0.3506
South Asia vs Horn of Africa	13	1879488	G	A	0.851707	P47 (PF3D7 1346800)	0.4924
South Asia vs South Central Africa	3	622763	G	C	0.810938	CTRP (PF3D7 0315200)	0.4009
South Asia vs South Central Africa	3	851156	C	T	0.76174	Cap380 (PF3D7 0320400)	0.4239
South Asia vs South Central Africa	5	1042561	T	G	0.834091	ACS10 (PF3D7 0525100)	0.2959
South Asia vs South Central Africa	5	1043474	G	T	0.845113	ACS10 (PF3D7 0525100)	0.488
South Asia vs South Central Africa	6	1110981	A	G	0.777064	PF3D7 0627700 (PF3D7 0627700)	0.4753
South Asia vs South Central Africa	6	1117519	A	G	0.759343	ACS (PF3D7 0627800)	0.456
South Asia vs South Central Africa	7	403625	A	C	0.835643	CRT (PF3D7 0709000)	0.3507
South Asia vs South Central Africa	7	404407	G	T	0.84063	CRT (PF3D7 0709000)	0.3652
South Asia vs South Central Africa	7	404836	C	G	0.832093	CRT (PF3D7 0709000)	0.4596
South Asia vs South Central Africa	9	127644	G	A	0.758714	PF3D7 0902900 (PF3D7 0902900)	0.3612
South Asia vs South Central Africa	9	1178963	G	A	0.820562	RhopH2 (PF3D7 0929400)	0.2924
South Asia vs South Central Africa	9	1179228	G	A	0.879916	RhopH2 (PF3D7 0929400)	0.374
South Asia vs South Central Africa	11	638299	T	G	0.947593	HSP101 (PF3D7 1116800)	0.4931
South Asia vs South Central Africa	13	872241	G	A	0.782074	PF3D7 1321100 (PF3D7 1321100)	0.4408
South Asia vs South Central Africa	13	1879488	G	A	0.851707	P47 (PF3D7 1346800)	0.4924
South Asia vs South Central Africa	13	2435370	A	T	0.802269	FLN (PF3D7 1360800)	0.4409
South Asia vs South Central Africa	14	2185421	G	T	0.760973	PF3D7 1453200 (PF3D7 1453200)	0.3849
Southeast Asia vs Central Africa	1	180379	T	A	0.785663	PF3D7 0104100 (PF3D7 0104100)	0.4388
Southeast Asia vs Central Africa	2	319674	G	A	0.779046	SERA2 (PF3D7 0207900)	0.4644
Southeast Asia vs Central Africa	2	623146	T	C	0.955005	PF3D7 0215100 (PF3D7 0215100)	0.4705
Southeast Asia vs Central Africa	2	799043	G	A	0.753031	LSA3 (PF3D7 0220000)	0.4994
Southeast Asia vs Central Africa	3	122810	A	G	0.864432	CLAG3.2 (PF3D7 0302200)	0.4943
Southeast Asia vs Central Africa	3	361195	G	A	0.768599	PF3D7 0308100 (PF3D7 0308100)	0.4164
Southeast Asia vs Central Africa	3	361199	C	T	0.775213	PF3D7 0308100 (PF3D7 0308100)	0.4175
Southeast Asia vs Central Africa	3	622763	G	C	0.842018	CTRP (PF3D7 0315200)	0.4009
Southeast Asia vs Central Africa	3	851156	C	T	0.791368	Cap380 (PF3D7 0320400)	0.4239
Southeast Asia vs Central Africa	4	856082	A	G	0.813817	PF3D7 0419300 (PF3D7 0419300)	0.4872
Southeast Asia vs Central Africa	4	1128627	A	T	0.775475	PF3D7 0424900 (PF3D7 0424900)	0.4616
Southeast Asia vs Central Africa	5	641205	G	T	0.750489	PF3D7 0515500 (PF3D7 0515500)	0.4807
Southeast Asia vs Central Africa	5	1043474	G	T	0.911036	ACS10 (PF3D7 0525100)	0.488
Southeast Asia vs Central Africa	6	346856	A	C	0.752196	PF3D7 0608300 (PF3D7 0608300)	0.4309
Southeast Asia vs Central Africa	6	404679	T	A	0.86531	PF3D7 0609500 (PF3D7 0609500)	0.4538
Southeast Asia vs Central Africa	6	531935	G	A	0.798918	PF3D7 0612900 (PF3D7 0612900)	0.4488
Southeast Asia vs Central Africa	6	851736	C	T	0.838117	MSP10 (PF3D7 0620400)	0.4696
Southeast Asia vs Central Africa	8	585854	A	C	0.859126	PF3D7 0811600 (PF3D7 0811600)	0.4093
Southeast Asia vs Central Africa	8	812561	G	A	0.924108	RON5	0.4888
Southeast Asia vs Central Africa	8	812570	C	T	0.921605	RON5	0.4889
Southeast Asia vs Central Africa	8	812667	G	A	0.889639	RON5 (PF3D7 0817700)	0.4691
Southeast Asia vs Central Africa	8	846225	G	T	0.763571	PBLP (PF3D7 0818600)	0.4252
Southeast Asia vs Central Africa	8	1005851	G	C	0.814317	PF3D7 0822800 (PF3D7 0822800)	0.4911
Southeast Asia vs Central Africa	9	631776	C	T	0.756325	PF3D7 0914700 (PF3D7 0914700)	0.4497
Southeast Asia vs Central Africa	9	1406576	G	A	0.887567	GIG (PF3D7 0935600)	0.4711
Southeast Asia vs Central Africa	10	1181683	T	C	0.762279	MTRAP (PF3D7 1028700)	0.468
Southeast Asia vs Central Africa	11	638299	T	G	0.997289	HSP101 (PF3D7 1116800)	0.4931
Southeast Asia vs Central Africa	11	1313769	C	T	0.886037	PF3D7 1133900 (PF3D7 1133900)	0.4948
Southeast Asia vs Central Africa	12	1114059	T	C	0.826777	CYC2 (PF3D7 1227500)	0.4993
Southeast Asia vs Central Africa	12	1162825	A	C	0.79427	MSP9 (PF3D7 1228600)	0.4934
Southeast Asia vs Central Africa	12	1394482	A	G	0.776011	AARP1 (PF3D7 1233600)	0.4661
Southeast Asia vs Central Africa	13	872241	G	A	0.811977	PF3D7 1321100 (PF3D7 1321100)	0.4408
Southeast Asia vs Central Africa	13	1697887	T	C	0.907282	PMT (PF3D7 1343000)	0.4451
Southeast Asia vs Central Africa	13	1858907	C	T	0.853307	PF3D7 1346400 (PF3D7 1346400)	0.4592
Southeast Asia vs Central Africa	13	1879453	T	A	0.823161	P47 (PF3D7 1346800)	0.3506
Southeast Asia vs Central Africa	13	1879488	G	A	0.997555	P47 (PF3D7 1346800)	0.4924
Southeast Asia vs Central Africa	13	2435370	A	T	0.866121	FLN (PF3D7 1360800)	0.4409
Southeast Asia vs Central Africa	14	514157	C	T	0.829762	PF3D7 1412700 (PF3D7 1412700)	0.4782
Southeast Asia vs Central Africa	14	683666	G	A	0.754338	PF3D7 1416800 (PF3D7 1416800)	0.4109
Southeast Asia vs Central Africa	14	711335	G	A	0.843533	ATG4 (PF3D7 1417300)	0.4891
Southeast Asia vs Central Africa	14	922960	A	G	0.785562	PF3D7 1422900 (PF3D7 1422900)	0.497
Southeast Asia vs Central Africa	14	1480458	A	T	0.874703	PTEX150 (PF3D7 1436300)	0.3671
Southeast Asia vs Central Africa	14	1542768	C	A	0.790019	SEC62	0.4039
Southeast Asia vs Central Africa	14	1562642	T	A	0.75278	PF3D7 1438600 (PF3D7 1438600)	0.4934
Southeast Asia vs Central Africa	14	1666117	T	C	0.784777	PF3D7 1440800 (PF3D7 1440800)	0.3647
Southeast Asia vs Central Africa	14	2185421	G	T	0.851826	PF3D7 1453200 (PF3D7 1453200)	0.3849
Southeast Asia vs Central Africa	14	2364543	A	T	0.86815	PF3D7 1457600 (PF3D7 1457600)	0.4767
Southeast Asia vs Central Africa	14	3101577	C	G	0.836942	CRMP4 (PF3D7 1475400)	0.4616
Southeast Asia vs Horn of Africa	3	122810	A	G	0.866948	CLAG3.2 (PF3D7 0302200)	0.4943
Southeast Asia vs Horn of Africa	3	361195	G	A	0.864276	PF3D7 0308100 (PF3D7 0308100)	0.4164
Southeast Asia vs Horn of Africa	3	361199	C	T	0.863956	PF3D7 0308100 (PF3D7 0308100)	0.4175
Southeast Asia vs Horn of Africa	3	851156	C	T	0.93942	Cap380 (PF3D7 0320400)	0.4239
Southeast Asia vs Horn of Africa	4	329468	A	T	0.891001	Pfs16 (PF3D7 0406200)	0.4913
Southeast Asia vs Horn of Africa	4	1128627	A	T	0.881642	PF3D7 0424900 (PF3D7 0424900)	0.4616
Southeast Asia vs Horn of Africa	5	419891	A	C	0.82616	PF3D7 0510000	0.3834
Southeast Asia vs Horn of Africa	5	706173	T	A	0.752596	ApiAP2 (PF3D7 0516800)	0.1881
Southeast Asia vs Horn of Africa	5	1042561	T	G	0.87286	ACS10 (PF3D7 0525100)	0.2959
Southeast Asia vs Horn of Africa	5	1043474	G	T	0.960882	ACS10 (PF3D7 0525100)	0.488
Southeast Asia vs Horn of Africa	5	1108445	G	T	0.796499	PF3D7 0526600 (PF3D7 0526600)	0.4536
Southeast Asia vs Horn of Africa	5	1188542	T	C	0.80122	PF3D7 0529000 (PF3D7 0529000)	0.4327
Southeast Asia vs Horn of Africa	6	261661	A	G	0.797859	PF3D7 0606200 (PF3D7 0606200)	0.4137
Southeast Asia vs Horn of Africa	6	404679	T	A	0.866435	PF3D7 0609500 (PF3D7 0609500)	0.4538
Southeast Asia vs Horn of Africa	6	851736	C	T	0.80128	MSP10 (PF3D7 0620400)	0.4696
Southeast Asia vs Horn of Africa	7	730268	A	C	0.839537	PF3D7 0716700 (PF3D7 0716700)	0.4731
Southeast Asia vs Horn of Africa	8	812561	G	A	0.923891	RON5	0.4888
Southeast Asia vs Horn of Africa	8	812570	C	T	0.923451	RON5	0.4889
Southeast Asia vs Horn of Africa	8	812667	G	A	0.910826	RON5 (PF3D7 0817700)	0.4691
Southeast Asia vs Horn of Africa	8	1005851	G	C	0.836305	PF3D7 0822800 (PF3D7 0822800)	0.4911
Southeast Asia vs Horn of Africa	8	1201455	C	T	0.756115	SET3 (PF3D7 0827800)	0.3026
Southeast Asia vs Horn of Africa	9	290285	C	T	0.806214	PF3D7 0905800 (PF3D7 0905800)	0.4622
Southeast Asia vs Horn of Africa	9	290324	G	A	0.811734	PF3D7 0905800 (PF3D7 0905800)	0.4712
Southeast Asia vs Horn of Africa	9	512326	A	C	0.918632	CRMP1 (PF3D7 0911300)	0.4501
Southeast Asia vs Horn of Africa	9	512739	G	C	0.891485	CRMP1 (PF3D7 0911300)	0.3466
Southeast Asia vs Horn of Africa	9	516978	G	A	0.869583	CRMP1 (PF3D7 0911300)	0.4444
Southeast Asia vs Horn of Africa	9	631776	C	T	0.777292	PF3D7 0914700 (PF3D7 0914700)	0.4497
Southeast Asia vs Horn of Africa	10	341106	A	G	0.788932	PF3D7 1008100 (PF3D7 1008100)	0.3281
Southeast Asia vs Horn of Africa	11	638299	T	G	0.966975	HSP101 (PF3D7 1116800)	0.4931
Southeast Asia vs Horn of Africa	11	1243999	T	C	0.820681	PF3D7 1132100 (PF3D7 1132100)	0.465
Southeast Asia vs Horn of Africa	12	476635	G	C	0.75755	PF3D7 1210700 (PF3D7 1210700)	0.4509
Southeast Asia vs Horn of Africa	13	1750965	T	A	0.822154	PF3D7 1343800 (PF3D7 1343800)	0.4628
Southeast Asia vs Horn of Africa	13	1766359	C	G	0.860691	PF3D7 1344100 (PF3D7 1344100)	0.4407
Southeast Asia vs Horn of Africa	13	1879453	T	A	0.951924	P47 (PF3D7 1346800)	0.3506
Southeast Asia vs Horn of Africa	13	1879488	G	A	0.997555	P47 (PF3D7 1346800)	0.4924
Southeast Asia vs Horn of Africa	14	514157	C	T	0.833892	PF3D7 1412700 (PF3D7 1412700)	0.4782
Southeast Asia vs Horn of Africa	14	711335	G	A	0.793591	ATG4 (PF3D7 1417300)	0.4891
Southeast Asia vs Horn of Africa	14	922960	A	G	0.830333	PF3D7 1422900 (PF3D7 1422900)	0.497
Southeast Asia vs Horn of Africa	14	1106139	C	T	0.81187	PF3D7 1428300 (PF3D7 1428300)	0.3685
Southeast Asia vs Horn of Africa	14	2536485	A	G	0.811811	PF3D7 1462400 (PF3D7 1462400)	0.3323
Southeast Asia vs Horn of Africa	14	2575660	C	A	0.761481	PF3D7 1463400 (PF3D7 1463400)	0.4715
Southeast Asia vs Horn of Africa	14	2695875	T	C	0.882127	PF3D7 1466200 (PF3D7 1466200)	0.4575
Southeast Asia vs Horn of Africa	14	2715129	T	C	0.762267	ApiAP2 (PF3D7 1466400)	0.1981
Southeast Asia vs Horn of Africa	14	3101577	C	G	0.924372	CRMP4 (PF3D7 1475400)	0.4616
Southeast Asia vs South America	2	86870	C	T	0.847441	KAHsp40 (PF3D7 0201800)	0.3324
Southeast Asia vs South America	2	166372	T	C	0.952413	PF3D7 0203600 (PF3D7 0203600)	0.4179
Southeast Asia vs South America	2	614624	C	T	0.919095	RON6	0.3229
Southeast Asia vs South America	2	799043	G	A	0.861769	LSA3 (PF3D7 0220000)	0.4994
Southeast Asia vs South America	3	273124	T	C	0.841926	PF3D7 0305500 (PF3D7 0305500)	0.2185
Southeast Asia vs South America	3	510000	G	T	0.968299	PF3D7 0311900 (PF3D7 0311900)	0.3991
Southeast Asia vs South America	3	561220	A	G	0.86013	PF3D7 0313800 (PF3D7 0313800)	0.4563
Southeast Asia vs South America	3	849476	C	T	0.914152	Cap380 (PF3D7 0320400)	0.2944
Southeast Asia vs South America	4	329468	A	T	0.972985	Pfs16 (PF3D7 0406200)	0.4913
Southeast Asia vs South America	4	677644	A	G	0.869741	PF3D7 0415200 (PF3D7 0415200)	0.115
Southeast Asia vs South America	4	683888	G	A	0.852045	CRK3 (PF3D7 0415300)	0.1523
Southeast Asia vs South America	4	691961	C	T	0.859587	PF3D7 0415700 (PF3D7 0415700)	0.2948
Southeast Asia vs South America	4	748262	T	C	0.993328	DHFR-TS (PF3D7 0417200)	0.1808
Southeast Asia vs South America	4	757119	A	G	0.87336	PF3D7 0417400 (PF3D7 0417400)	0.3289
Southeast Asia vs South America	4	767099	T	G	0.847857	PF3D7 0417400 (PF3D7 0417400)	0.4823
Southeast Asia vs South America	4	797761	A	C	0.983034	PF3D7 0418000 (PF3D7 0418000)	0.2948
Southeast Asia vs South America	4	839310	A	G	0.878577	PF3D7 0418600 (PF3D7 0418600)	0.2204
Southeast Asia vs South America	5	376115	C	T	0.79915	PF3D7 0508900 (PF3D7 0508900)	0.3954
Southeast Asia vs South America	5	382974	T	A	0.912441	PF3D7 0509100 (PF3D7 0509100)	0.4427
Southeast Asia vs South America	5	396039	T	C	0.83983	RNAPI (PF3D7 0509400)	0.2596
Southeast Asia vs South America	5	407043	T	G	0.834565	PF3D7 0509700 (PF3D7 0509700)	0.4519
Southeast Asia vs South America	5	471883	G	A	0.849297	SCD (PF3D7 0511200)	0.2324
Southeast Asia vs South America	5	561244	G	T	0.811386	PF3D7 0513200 (PF3D7 0513200)	0.2825
Southeast Asia vs South America	5	643899	A	G	0.941259	PF3D7 0515500 (PF3D7 0515500)	0.4356
Southeast Asia vs South America	5	908826	G	A	0.93643	PF3D7 0522400 (PF3D7 0522400)	0.2865
Southeast Asia vs South America	5	929884	A	G	0.896869	PF3D7 0522400 (PF3D7 0522400)	0.2951
Southeast Asia vs South America	5	930435	C	T	0.92238	PF3D7 0522400 (PF3D7 0522400)	0.4172
Southeast Asia vs South America	5	966314	C	A	0.868818	PF3D7 0523200 (PF3D7 0523200)	0.163
Southeast Asia vs South America	5	1042561	T	G	0.930644	ACS10 (PF3D7 0525100)	0.2959
Southeast Asia vs South America	5	1043303	G	A	0.993445	ACS10 (PF3D7 0525100)	0.2836
Southeast Asia vs South America	5	1043474	G	T	0.992134	ACS10 (PF3D7 0525100)	0.488
Southeast Asia vs South America	5	1188542	T	C	0.997986	PF3D7 0529000 (PF3D7 0529000)	0.4327
Southeast Asia vs South America	6	182965	T	C	0.841728	PF3D7 0604300 (PF3D7 0604300)	0.3279
Southeast Asia vs South America	6	346856	A	C	0.866804	PF3D7 0608300 (PF3D7 0608300)	0.4309
Southeast Asia vs South America	6	377297	A	T	0.781562	PF3D7 0609000 (PF3D7 0609000)	0.2065
Southeast Asia vs South America	6	387083	A	G	0.802346	PF3D7 0609000 (PF3D7 0609000)	0.4691
Southeast Asia vs South America	6	389754	A	G	0.915613	PF3D7 0609100 (PF3D7 0609100)	0.4064
Southeast Asia vs South America	6	417469	A	G	0.922777	PF3D7 0609700 (PF3D7 0609700)	0.4712
Southeast Asia vs South America	6	482969	G	A	0.839731	PF3D7 0611500 (PF3D7 0611500)	0.1406
Southeast Asia vs South America	6	528066	T	A	0.752244	P12p (PF3D7 0612800)	0.3696
Southeast Asia vs South America	6	591985	G	T	0.820529	PF3D7 0614100 (PF3D7 0614100)	0.4514
Southeast Asia vs South America	6	627141	T	G	0.84026	PF3D7 0615200 (PF3D7 0615200)	0.295
Southeast Asia vs South America	6	682567	T	A	0.763678	PF3D7 0616400 (PF3D7 0616400)	0.4874
Southeast Asia vs South America	6	834400	G	A	0.876428	PF3D7 0619800 (PF3D7 0619800)	0.4618
Southeast Asia vs South America	6	834448	T	A	0.915608	PF3D7 0619800 (PF3D7 0619800)	0.463
Southeast Asia vs South America	6	851736	C	T	0.932818	MSP10 (PF3D7 0620400)	0.4696
Southeast Asia vs South America	6	851979	A	G	0.848546	MSP10 (PF3D7 0620400)	0.3484
Southeast Asia vs South America	6	1110981	A	G	0.999087	PF3D7 0627700 (PF3D7 0627700)	0.4753
Southeast Asia vs South America	6	1111541	C	T	0.889471	PF3D7 0627700 (PF3D7 0627700)	0.3828
Southeast Asia vs South America	6	1114625	A	C	0.9993	ACS (PF3D7 0627800)	0.4544
Southeast Asia vs South America	6	1114928	A	G	0.999158	ACS (PF3D7 0627800)	0.4704
Southeast Asia vs South America	6	1114951	C	T	0.999824	ACS (PF3D7 0627800)	0.4699
Southeast Asia vs South America	6	1116314	T	C	0.999648	ACS (PF3D7 0627800)	0.4624
Southeast Asia vs South America	6	1117519	A	G	0.999382	ACS (PF3D7 0627800)	0.456
Southeast Asia vs South America	6	1206227	A	T	0.991066	PL (PF3D7 0629300)	0.3303
Southeast Asia vs South America	6	1224777	T	A	0.994256	SET1 (PF3D7 0629700)	0.2436
Southeast Asia vs South America	7	150143	C	T	0.760737	PF3D7 0703800 (PF3D7 0703800)	0.4144
Southeast Asia vs South America	7	270957	G	A	0.899343	PF3D7 0705500 (PF3D7 0705500)	0.3824
Southeast Asia vs South America	7	375339	A	G	0.837119	PF3D7 0708200 (PF3D7 0708200)	0.3444
Southeast Asia vs South America	7	378669	G	A	0.877169	BUD32 (PF3D7 0708300)	0.2633
Southeast Asia vs South America	7	383166	C	T	0.956294	HSP90	0.3432
Southeast Asia vs South America	7	383527	T	C	0.881294	HSP90	0.1849
Southeast Asia vs South America	7	385921	C	T	0.915641	PF3D7 0708500 (PF3D7 0708500)	0.4956
Southeast Asia vs South America	7	403337	G	T	0.871374	CRT	0.3022
Southeast Asia vs South America	7	404836	C	G	0.966822	CRT (PF3D7 0709000)	0.4596
Southeast Asia vs South America	7	410036	A	G	0.956741	PF3D7 0709100 (PF3D7 0709100)	0.4346
Southeast Asia vs South America	7	419603	T	A	0.755425	CG2 (PF3D7 0709300)	0.299
Southeast Asia vs South America	7	421420	G	A	0.857106	CG2 (PF3D7 0709300)	0.4815
Southeast Asia vs South America	7	432784	T	A	0.823817	POP1 (PF3D7 0709600)	0.4225
Southeast Asia vs South America	7	445690	A	G	0.891812	PF3D7 0709900 (PF3D7 0709900)	0.4713
Southeast Asia vs South America	7	449692	T	A	0.839024	PF3D7 0710000 (PF3D7 0710000)	0.4284
Southeast Asia vs South America	7	449790	T	A	0.9403	PF3D7 0710000 (PF3D7 0710000)	0.4385
Southeast Asia vs South America	7	450016	A	G	0.815625	PF3D7 0710000 (PF3D7 0710000)	0.4157
Southeast Asia vs South America	7	450032	A	G	0.820544	PF3D7 0710000 (PF3D7 0710000)	0.3907
Southeast Asia vs South America	7	450424	G	T	0.812516	PF3D7 0710000 (PF3D7 0710000)	0.3217
Southeast Asia vs South America	7	455494	A	G	0.886967	PF3D7 0710000 (PF3D7 0710000)	0.3525
Southeast Asia vs South America	7	455550	T	A	0.87041	PF3D7 0710000 (PF3D7 0710000)	0.3431
Southeast Asia vs South America	7	455798	G	A	0.819695	PF3D7 0710000	0.3187
Southeast Asia vs South America	7	464317	G	A	0.866285	PF3D7 0710200 (PF3D7 0710200)	0.4697
Southeast Asia vs South America	7	464353	G	T	0.86713	PF3D7 0710200 (PF3D7 0710200)	0.4737
Southeast Asia vs South America	7	469640	T	A	0.812667	PF3D7 0710200 (PF3D7 0710200)	0.4919
Southeast Asia vs South America	7	620660	T	A	0.815331	PF3D7 0713600 (PF3D7 0713600)	0.2945
Southeast Asia vs South America	7	706074	A	T	0.774098	PF3D7 0716000 (PF3D7 0716000)	0.3607
Southeast Asia vs South America	7	732865	G	A	0.898846	EIF3I (PF3D7 0716800)	0.3361
Southeast Asia vs South America	7	815129	T	C	0.991042	CRMP2 (PF3D7 0718300)	0.3475
Southeast Asia vs South America	7	816733	A	G	0.986559	CRMP2 (PF3D7 0718300)	0.4299
Southeast Asia vs South America	7	866181	A	G	0.82261	PF3D7 0719900 (PF3D7 0719900)	0.09178
Southeast Asia vs South America	7	1262404	C	T	0.816307	PF3D7 0729700 (PF3D7 0729700)	0.3992
Southeast Asia vs South America	7	1262543	T	C	0.88673	PF3D7 0729700 (PF3D7 0729700)	0.4202
Southeast Asia vs South America	7	1262550	G	T	0.893326	PF3D7 0729700 (PF3D7 0729700)	0.4176
Southeast Asia vs South America	7	1262562	G	A	0.896683	PF3D7 0729700 (PF3D7 0729700)	0.4144
Southeast Asia vs South America	7	1269371	C	T	0.769373	PF3D7 0729900 (PF3D7 0729900)	0.301
Southeast Asia vs South America	7	1362917	T	A	0.829362	EBA175 (PF3D7 0731500)	0.3505
Southeast Asia vs South America	7	1362925	A	T	0.828804	EBA175 (PF3D7 0731500)	0.3016
Southeast Asia vs South America	8	489611	A	T	0.959959	PF3D7 0809600 (PF3D7 0809600)	0.2728
Southeast Asia vs South America	8	492502	T	A	0.821186	PF3D7 0809600 (PF3D7 0809600)	0.2773
Southeast Asia vs South America	8	505739	A	G	0.825469	PF3D7 0809800 (PF3D7 0809800)	0.2991
Southeast Asia vs South America	8	546841	T	A	0.864453	PF3D7 0810700 (PF3D7 0810700)	0.3744
Southeast Asia vs South America	8	619138	A	G	0.908786	SSP3 (PF3D7 0812300)	0.454
Southeast Asia vs South America	8	991389	G	T	0.812513	PF3D7 0822400 (PF3D7 0822400)	0.4443
Southeast Asia vs South America	8	1102781	A	T	0.754368	PF3D7 0825700 (PF3D7 0825700)	0.2336
Southeast Asia vs South America	8	1114155	C	T	0.795974	PF3D7 0826100 (PF3D7 0826100)	0.4925
Southeast Asia vs South America	8	1117018	C	T	0.78681	PF3D7 0826100 (PF3D7 0826100)	0.4726
Southeast Asia vs South America	8	1167885	C	T	0.866357	DBP10 (PF3D7 0827000)	0.2631
Southeast Asia vs South America	8	1176457	C	T	0.815274	IF2c (PF3D7 0827100)	0.4629
Southeast Asia vs South America	9	231065	C	A	0.904456	CuTP (PF3D7 0904900)	0.2482
Southeast Asia vs South America	9	283868	A	G	0.857543	WDR66 (PF3D7 0905600)	0.4969
Southeast Asia vs South America	9	512326	A	C	0.98112	CRMP1 (PF3D7 0911300)	0.4501
Southeast Asia vs South America	9	516978	G	A	0.993087	CRMP1 (PF3D7 0911300)	0.4444
Southeast Asia vs South America	9	1005351	G	C	0.871374	PF3D7 0924600 (PF3D7 0924600)	0.4407
Southeast Asia vs South America	9	1015339	T	C	0.846964	PF3D7 0925100 (PF3D7 0925100)	0.254
Southeast Asia vs South America	9	1078816	T	A	0.837279	PF3D7 0926500 (PF3D7 0926500)	0.493
Southeast Asia vs South America	9	1084846	A	C	0.932793	PF3D7 0926600 (PF3D7 0926600)	0.23
Southeast Asia vs South America	9	1406576	G	A	0.902738	GIG (PF3D7 0935600)	0.4711
Southeast Asia vs South America	10	444064	A	G	0.991842	PF3D7 1011500 (PF3D7 1011500)	0.3266
Southeast Asia vs South America	10	605295	T	A	0.897492	PF3D7 1014900 (PF3D7 1014900)	0.4687
Southeast Asia vs South America	10	662320	T	C	0.996829	PF3D7 1016500 (PF3D7 1016500)	0.3245
Southeast Asia vs South America	10	817457	C	T	0.932649	PF3D7 1020200 (PF3D7 1020200)	0.2634
Southeast Asia vs South America	10	862077	G	C	0.989232	PF3D7 1021300 (PF3D7 1021300)	0.3556
Southeast Asia vs South America	10	1111441	T	C	0.988434	CDC20 (PF3D7 1026400)	0.362
Southeast Asia vs South America	11	284399	T	A	0.893773	PF3D7 1106800 (PF3D7 1106800)	0.2376
Southeast Asia vs South America	11	307361	G	A	0.910766	PAIP1 (PF3D7 1107300)	0.1506
Southeast Asia vs South America	11	360271	C	T	0.846919	PF3D7 1108100	0.1881
Southeast Asia vs South America	11	473241	C	T	0.75741	PF3D7 1112300 (PF3D7 1112300)	0.2281
Southeast Asia vs South America	11	565295	G	A	0.933501	PF3D7 1114900 (PF3D7 1114900)	0.3378
Southeast Asia vs South America	11	1006784	T	C	0.963282	PF3D7 1125700 (PF3D7 1125700)	0.4857
Southeast Asia vs South America	11	1507877	C	T	0.781593	GCalpha (PF3D7 1138400)	0.4567
Southeast Asia vs South America	11	1594572	G	A	0.796252	PF3D7 1139900	0.4756
Southeast Asia vs South America	12	95417	T	A	0.947136	PF3D7 1201400 (PF3D7 1201400)	0.3774
Southeast Asia vs South America	12	836994	T	C	0.955028	SET10 (PF3D7 1221000)	0.3953
Southeast Asia vs South America	12	1162825	A	C	0.990141	MSP9 (PF3D7 1228600)	0.4934
Southeast Asia vs South America	12	1184925	A	G	0.77636	PF3D7 1228900 (PF3D7 1228900)	0.317
Southeast Asia vs South America	12	1555889	C	G	0.901932	PF3D7 1237200 (PF3D7 1237200)	0.3873
Southeast Asia vs South America	12	1839613	T	G	0.754691	DOC2 (PF3D7 1243900)	0.4349
Southeast Asia vs South America	12	2151902	T	C	0.871371	PF3D7 1252600 (PF3D7 1252600)	0.4582
Southeast Asia vs South America	13	366999	G	T	0.884821	cpsSII (PF3D7 1308200)	0.1949
Southeast Asia vs South America	13	388365	A	C	0.762392	PF3D7 1308400 (PF3D7 1308400)	0.4107
Southeast Asia vs South America	13	445694	C	T	0.891241	PF3D7 1309800 (PF3D7 1309800)	0.2115
Southeast Asia vs South America	13	1359289	T	G	0.956812	PF3D7 1333100 (PF3D7 1333100)	0.3268
Southeast Asia vs South America	13	1404127	G	T	0.76633	MSRP4 (PF3D7 1334400)	0.3268
Southeast Asia vs South America	13	1466351	G	A	0.880079	TRAP (PF3D7 1335900)	0.3763
Southeast Asia vs South America	13	1745544	C	T	0.92698	PF3D7 1343800 (PF3D7 1343800)	0.4156
Southeast Asia vs South America	13	1750965	T	A	0.979508	PF3D7 1343800 (PF3D7 1343800)	0.4628
Southeast Asia vs South America	13	1858907	C	T	0.907169	PF3D7 1346400 (PF3D7 1346400)	0.4592
Southeast Asia vs South America	13	2070556	T	G	0.944191	PF3D7 1352000 (PF3D7 1352000)	0.3288
Southeast Asia vs South America	13	2179835	G	C	0.884977	PF3D7 1354700 (PF3D7 1354700)	0.3946
Southeast Asia vs South America	13	2342841	A	T	0.862977	PF3D7 1359000 (PF3D7 1359000)	0.3689
Southeast Asia vs South America	13	2422766	A	G	0.96463	GCbeta (PF3D7 1360500)	0.1615
Southeast Asia vs South America	13	2479113	C	G	0.982769	PF3D7 1361800 (PF3D7 1361800)	0.3359
Southeast Asia vs South America	13	2523562	G	A	0.874917	PF3D7 1362800 (PF3D7 1362800)	0.4906
Southeast Asia vs South America	13	2824624	C	T	0.840947	PF3D7 1371800 (PF3D7 1371800)	0.2665
Southeast Asia vs South America	14	41328	A	T	0.850375	PF3D7 1401100 (PF3D7 1401100)	0.1218
Southeast Asia vs South America	14	420628	A	G	0.958138	RAP1 (PF3D7 1410400)	0.1839
Southeast Asia vs South America	14	478047	G	C	0.76755	PF3D7 1411800 (PF3D7 1411800)	0.2412
Southeast Asia vs South America	14	673692	T	C	0.756218	PF3D7 1416600 (PF3D7 1416600)	0.1089
Southeast Asia vs South America	14	911819	G	C	0.919216	PF3D7 1422600 (PF3D7 1422600)	0.3623
Southeast Asia vs South America	14	922960	A	G	0.963437	PF3D7 1422900 (PF3D7 1422900)	0.497
Southeast Asia vs South America	14	1224877	G	A	0.769412	PF3D7 1431200 (PF3D7 1431200)	0.3105
Southeast Asia vs South America	14	1226565	T	G	0.77079	PF3D7 1431200 (PF3D7 1431200)	0.3349
Southeast Asia vs South America	14	1307328	A	G	0.845274	PF3D7 1433200 (PF3D7 1433200)	0.2984
Southeast Asia vs South America	14	1393032	C	T	0.861504	PF3D7 1434500 (PF3D7 1434500)	0.4632
Southeast Asia vs South America	14	1438616	T	C	0.956544	PF3D7 1435600 (PF3D7 1435600)	0.4912
Southeast Asia vs South America	14	1562642	T	A	0.965798	PF3D7 1438600 (PF3D7 1438600)	0.4934
Southeast Asia vs South America	14	1665655	G	T	0.998444	PF3D7 1440800 (PF3D7 1440800)	0.2395
Southeast Asia vs South America	14	1666117	T	C	0.997925	PF3D7 1440800 (PF3D7 1440800)	0.3647
Southeast Asia vs South America	14	1710253	A	T	0.857078	PF3D7 1442200 (PF3D7 1442200)	0.1109
Southeast Asia vs South America	14	1770207	T	C	0.850299	PF3D7 1443100 (PF3D7 1443100)	0.1937
Southeast Asia vs South America	14	2060776	G	A	0.785505	PF3D7 1450400 (PF3D7 1450400)	0.4208
Southeast Asia vs South America	14	2845773	A	G	0.946137	NT3 (PF3D7 1469400)	0.4808
Southeast Asia vs South America	14	3017880	T	C	0.785732	PF3D7 1474000 (PF3D7 1474000)	0.1069
Southeast Asia vs South America	14	3100739	A	C	0.836725	CRMP4 (PF3D7 1475400)	0.417
Southeast Asia vs South America	14	3126183	T	C	0.791082	PF3D7 1475900 (PF3D7 1475900)	0.1439
Southeast Asia vs South Central Africa	1	180379	T	A	0.830483	PF3D7 0104100 (PF3D7 0104100)	0.4388
Southeast Asia vs South Central Africa	2	319674	G	A	0.764301	SERA2 (PF3D7 0207900)	0.4644
Southeast Asia vs South Central Africa	2	623146	T	C	0.901924	PF3D7 0215100 (PF3D7 0215100)	0.4705
Southeast Asia vs South Central Africa	3	122810	A	G	0.866948	CLAG3.2 (PF3D7 0302200)	0.4943
Southeast Asia vs South Central Africa	3	361195	G	A	0.780743	PF3D7 0308100 (PF3D7 0308100)	0.4164
Southeast Asia vs South Central Africa	3	361199	C	T	0.782394	PF3D7 0308100 (PF3D7 0308100)	0.4175
Southeast Asia vs South Central Africa	3	622763	G	C	0.816982	CTRP (PF3D7 0315200)	0.4009
Southeast Asia vs South Central Africa	3	851156	C	T	0.792504	Cap380 (PF3D7 0320400)	0.4239
Southeast Asia vs South Central Africa	4	856082	A	G	0.809282	PF3D7 0419300 (PF3D7 0419300)	0.4872
Southeast Asia vs South Central Africa	4	1128627	A	T	0.755297	PF3D7 0424900 (PF3D7 0424900)	0.4616
Southeast Asia vs South Central Africa	5	641205	G	T	0.772078	PF3D7 0515500 (PF3D7 0515500)	0.4807
Southeast Asia vs South Central Africa	5	1042561	T	G	0.892813	ACS10 (PF3D7 0525100)	0.2959
Southeast Asia vs South Central Africa	5	1043474	G	T	0.950228	ACS10 (PF3D7 0525100)	0.488
Southeast Asia vs South Central Africa	6	346856	A	C	0.753003	PF3D7 0608300 (PF3D7 0608300)	0.4309
Southeast Asia vs South Central Africa	6	404679	T	A	0.901782	PF3D7 0609500 (PF3D7 0609500)	0.4538
Southeast Asia vs South Central Africa	6	1110981	A	G	0.77762	PF3D7 0627700 (PF3D7 0627700)	0.4753
Southeast Asia vs South Central Africa	6	1114587	A	T	0.750098	ACS (PF3D7 0627800)	0.3773
Southeast Asia vs South Central Africa	6	1114951	C	T	0.750227	ACS (PF3D7 0627800)	0.4699
Southeast Asia vs South Central Africa	6	1117519	A	G	0.761367	ACS (PF3D7 0627800)	0.456
Southeast Asia vs South Central Africa	7	385921	C	T	0.883524	PF3D7 0708500 (PF3D7 0708500)	0.4956
Southeast Asia vs South Central Africa	7	403625	A	C	0.967479	CRT (PF3D7 0709000)	0.3507
Southeast Asia vs South Central Africa	7	404407	G	T	0.964866	CRT (PF3D7 0709000)	0.3652
Southeast Asia vs South Central Africa	7	404836	C	G	0.966822	CRT (PF3D7 0709000)	0.4596
Southeast Asia vs South Central Africa	7	406231	C	T	0.844109	CRT	0.4237
Southeast Asia vs South Central Africa	7	410036	A	G	0.786713	PF3D7 0709100 (PF3D7 0709100)	0.4346
Southeast Asia vs South Central Africa	7	730268	A	C	0.922317	PF3D7 0716700 (PF3D7 0716700)	0.4731
Southeast Asia vs South Central Africa	7	732865	G	A	0.818308	EIF3I (PF3D7 0716800)	0.3361
Southeast Asia vs South Central Africa	8	812561	G	A	0.912477	RON5	0.4888
Southeast Asia vs South Central Africa	8	812570	C	T	0.912028	RON5	0.4889
Southeast Asia vs South Central Africa	8	812667	G	A	0.898597	RON5 (PF3D7 0817700)	0.4691
Southeast Asia vs South Central Africa	8	861388	A	G	0.780199	HSP70 (PF3D7 0818900)	0.4176
Southeast Asia vs South Central Africa	8	1005851	G	C	0.871363	PF3D7 0822800 (PF3D7 0822800)	0.4911
Southeast Asia vs South Central Africa	9	127644	G	A	0.775906	PF3D7 0902900 (PF3D7 0902900)	0.3612
Southeast Asia vs South Central Africa	9	290285	C	T	0.752143	PF3D7 0905800 (PF3D7 0905800)	0.4622
Southeast Asia vs South Central Africa	9	290324	G	A	0.7566	PF3D7 0905800 (PF3D7 0905800)	0.4712
Southeast Asia vs South Central Africa	9	631776	C	T	0.762096	PF3D7 0914700 (PF3D7 0914700)	0.4497
Southeast Asia vs South Central Africa	9	1406576	G	A	0.939222	GIG (PF3D7 0935600)	0.4711
Southeast Asia vs South Central Africa	10	1181683	T	C	0.832086	MTRAP (PF3D7 1028700)	0.468
Southeast Asia vs South Central Africa	11	638299	T	G	0.995314	HSP101 (PF3D7 1116800)	0.4931
Southeast Asia vs South Central Africa	11	1313769	C	T	0.889512	PF3D7 1133900 (PF3D7 1133900)	0.4948
Southeast Asia vs South Central Africa	12	1114059	T	C	0.793628	CYC2 (PF3D7 1227500)	0.4993
Southeast Asia vs South Central Africa	12	1394482	A	G	0.851008	AARP1 (PF3D7 1233600)	0.4661
Southeast Asia vs South Central Africa	13	872241	G	A	0.8242	PF3D7 1321100 (PF3D7 1321100)	0.4408
Southeast Asia vs South Central Africa	13	1697887	T	C	0.817092	PMT (PF3D7 1343000)	0.4451
Southeast Asia vs South Central Africa	13	1858907	C	T	0.807587	PF3D7 1346400 (PF3D7 1346400)	0.4592
Southeast Asia vs South Central Africa	13	1879453	T	A	0.813721	P47 (PF3D7 1346800)	0.3506
Southeast Asia vs South Central Africa	13	1879488	G	A	0.997555	P47 (PF3D7 1346800)	0.4924
Southeast Asia vs South Central Africa	13	2435370	A	T	0.884323	FLN (PF3D7 1360800)	0.4409
Southeast Asia vs South Central Africa	14	514157	C	T	0.825471	PF3D7 1412700 (PF3D7 1412700)	0.4782
Southeast Asia vs South Central Africa	14	711335	G	A	0.893191	ATG4 (PF3D7 1417300)	0.4891
Southeast Asia vs South Central Africa	14	922960	A	G	0.836602	PF3D7 1422900 (PF3D7 1422900)	0.497
Southeast Asia vs South Central Africa	14	1480458	A	T	0.80762	PTEX150 (PF3D7 1436300)	0.3671
Southeast Asia vs South Central Africa	14	1542768	C	A	0.762021	SEC62	0.4039
Southeast Asia vs South Central Africa	14	1562642	T	A	0.770799	PF3D7 1438600 (PF3D7 1438600)	0.4934
Southeast Asia vs South Central Africa	14	1666117	T	C	0.885476	PF3D7 1440800 (PF3D7 1440800)	0.3647
Southeast Asia vs South Central Africa	14	2185421	G	T	0.878612	PF3D7 1453200 (PF3D7 1453200)	0.3849
Southeast Asia vs South Central Africa	14	2364543	A	T	0.836194	PF3D7 1457600 (PF3D7 1457600)	0.4767
Southeast Asia vs South Central Africa	14	3101577	C	G	0.851419	CRMP4 (PF3D7 1475400)	0.4616
West Africa vs Horn of Africa	8	585854	A	C	0.814327	PF3D7 0811600 (PF3D7 0811600)	0.4093
West Africa vs Horn of Africa	9	1179228	G	A	0.848401	RhopH2 (PF3D7 0929400)	0.374
West Africa vs Horn of Africa	9	1179855	A	C	0.860785	RhopH2 (PF3D7 0929400)	0.3811
West Africa vs Horn of Africa	11	1507877	C	T	0.818058	GCalpha (PF3D7 1138400)	0.4567
West Africa vs Horn of Africa	13	2481108	C	G	0.788092	PF3D7 1361800 (PF3D7 1361800)	0.3507
West Africa vs Oceania	2	105618	A	T	0.7549	KAHRP	0.4974
West Africa vs Oceania	2	319674	G	A	0.935938	SERA2 (PF3D7 0207900)	0.4644
West Africa vs Oceania	2	511004	G	A	0.83932	PF3D7 0212500 (PF3D7 0212500)	0.3949
West Africa vs Oceania	2	623146	T	C	0.908456	PF3D7 0215100 (PF3D7 0215100)	0.4705
West Africa vs Oceania	3	618447	A	G	0.758596	CTRP (PF3D7 0315200)	0.3291
West Africa vs Oceania	3	622763	G	C	0.806109	CTRP (PF3D7 0315200)	0.4009
West Africa vs Oceania	3	851156	C	T	0.812057	Cap380 (PF3D7 0320400)	0.4239
West Africa vs Oceania	4	329468	A	T	0.88796	Pfs16 (PF3D7 0406200)	0.4913
West Africa vs Oceania	4	748239	A	T	0.76114	DHFR-TS (PF3D7 0417200)	0.21
West Africa vs Oceania	5	269459	T	G	0.842683	PF3D7 0506500 (PF3D7 0506500)	0.3725
West Africa vs Oceania	5	382974	T	A	0.800057	PF3D7 0509100 (PF3D7 0509100)	0.4427
West Africa vs Oceania	5	1108445	G	T	0.76112	PF3D7 0526600 (PF3D7 0526600)	0.4536
West Africa vs Oceania	6	387083	A	G	0.761938	PF3D7 0609000 (PF3D7 0609000)	0.4691
West Africa vs Oceania	6	575829	A	G	0.893305	ApiAP2 (PF3D7 0613800)	0.4066
West Africa vs Oceania	6	851736	C	T	0.832358	MSP10 (PF3D7 0620400)	0.4696
West Africa vs Oceania	6	1110981	A	G	0.868216	PF3D7 0627700 (PF3D7 0627700)	0.4753
West Africa vs Oceania	6	1114587	A	T	0.812346	ACS (PF3D7 0627800)	0.3773
West Africa vs Oceania	6	1114625	A	C	0.81199	ACS (PF3D7 0627800)	0.4544
West Africa vs Oceania	6	1114928	A	G	0.856594	ACS (PF3D7 0627800)	0.4704
West Africa vs Oceania	6	1114951	C	T	0.855941	ACS (PF3D7 0627800)	0.4699
West Africa vs Oceania	6	1116314	T	C	0.838578	ACS (PF3D7 0627800)	0.4624
West Africa vs Oceania	6	1117519	A	G	0.827821	ACS (PF3D7 0627800)	0.456
West Africa vs Oceania	6	1135810	C	T	0.807506	PF3D7 0628100 (PF3D7 0628100)	0.4275
West Africa vs Oceania	6	1141114	G	A	0.753141	PF3D7 0628100 (PF3D7 0628100)	0.346
West Africa vs Oceania	7	105304	T	C	0.928448	PF3D7 0702500 (PF3D7 0702500)	0.4706
West Africa vs Oceania	7	435413	C	T	0.757698	PF3D7 0709700 (PF3D7 0709700)	0.02794
West Africa vs Oceania	7	816733	A	G	0.848226	CRMP2 (PF3D7 0718300)	0.4299
West Africa vs Oceania	8	585854	A	C	0.98604	PF3D7 0811600 (PF3D7 0811600)	0.4093
West Africa vs Oceania	8	619138	A	G	0.789325	SSP3 (PF3D7 0812300)	0.454
West Africa vs Oceania	8	672242	T	A	0.767502	ABCF1 (PF3D7 0813700)	0.47
West Africa vs Oceania	8	812561	G	A	0.892006	RON5	0.4888
West Africa vs Oceania	8	812570	C	T	0.891359	RON5	0.4889
West Africa vs Oceania	8	812667	G	A	0.846688	RON5 (PF3D7 0817700)	0.4691
West Africa vs Oceania	8	861388	A	G	0.813484	HSP70 (PF3D7 0818900)	0.4176
West Africa vs Oceania	8	991389	G	T	0.807087	PF3D7 0822400 (PF3D7 0822400)	0.4443
West Africa vs Oceania	8	1002018	T	C	0.917532	PF3D7 0822700 (PF3D7 0822700)	0.2002
West Africa vs Oceania	9	512326	A	C	0.901611	CRMP1 (PF3D7 0911300)	0.4501
West Africa vs Oceania	9	512739	G	C	0.776261	CRMP1 (PF3D7 0911300)	0.3466
West Africa vs Oceania	9	516978	G	A	0.876368	CRMP1 (PF3D7 0911300)	0.4444
West Africa vs Oceania	9	1179855	A	C	0.957416	RhopH2 (PF3D7 0929400)	0.3811
West Africa vs Oceania	9	1406576	G	A	0.814493	GIG (PF3D7 0935600)	0.4711
West Africa vs Oceania	10	653138	C	T	0.750567	GBP (PF3D7 1016300)	0.3729
West Africa vs Oceania	10	658468	C	T	0.840354	FIKK10.1 (PF3D7 1016400)	0.2286
West Africa vs Oceania	11	480718	C	T	0.787306	PF3D7 1112600 (PF3D7 1112600)	0.3219
West Africa vs Oceania	11	638299	T	G	0.998711	HSP101 (PF3D7 1116800)	0.4931
West Africa vs Oceania	11	1375988	T	C	0.937853	PPM8 (PF3D7 1135100)	0.4143
West Africa vs Oceania	11	1507877	C	T	0.871204	GCalpha (PF3D7 1138400)	0.4567
West Africa vs Oceania	12	1114059	T	C	0.823307	CYC2 (PF3D7 1227500)	0.4993
West Africa vs Oceania	12	1162825	A	C	0.808116	MSP9 (PF3D7 1228600)	0.4934
West Africa vs Oceania	12	2151902	T	C	0.914286	PF3D7 1252600 (PF3D7 1252600)	0.4582
West Africa vs Oceania	13	852849	C	A	0.750189	PF3D7 1320700 (PF3D7 1320700)	0.3475
West Africa vs Oceania	13	872241	G	A	0.80398	PF3D7 1321100 (PF3D7 1321100)	0.4408
West Africa vs Oceania	13	1013674	G	T	0.759582	PF3D7 1324300 (PF3D7 1324300)	0.3201
West Africa vs Oceania	13	1697887	T	C	0.795417	PMT (PF3D7 1343000)	0.4451
West Africa vs Oceania	13	1700345	T	C	0.856737	PF3D7 1343100 (PF3D7 1343100)	0.3262
West Africa vs Oceania	13	1766359	C	G	0.758182	PF3D7 1344100 (PF3D7 1344100)	0.4407
West Africa vs Oceania	13	1879488	G	A	0.966514	P47 (PF3D7 1346800)	0.4924
West Africa vs Oceania	13	2124825	T	A	0.789627	PF3D7 1353100 (PF3D7 1353100)	0.28
West Africa vs Oceania	13	2435370	A	T	0.7662	FLN (PF3D7 1360800)	0.4409
West Africa vs Oceania	13	2479113	C	G	0.802146	PF3D7 1361800 (PF3D7 1361800)	0.3359
West Africa vs Oceania	13	2481108	C	G	0.937652	PF3D7 1361800 (PF3D7 1361800)	0.3507
West Africa vs Oceania	14	161286	G	T	0.842807	PF3D7 1404700 (PF3D7 1404700)	0.347
West Africa vs Oceania	14	2364543	A	T	0.796712	PF3D7 1457600 (PF3D7 1457600)	0.4767
West Africa vs South America	2	511004	G	A	0.83387	PF3D7 0212500 (PF3D7 0212500)	0.3949
West Africa vs South America	2	623146	T	C	0.771555	PF3D7 0215100 (PF3D7 0215100)	0.4705
West Africa vs South America	3	618447	A	G	0.751496	CTRP (PF3D7 0315200)	0.3291
West Africa vs South America	3	622763	G	C	0.817031	CTRP (PF3D7 0315200)	0.4009
West Africa vs South America	4	683888	G	A	0.759943	CRK3 (PF3D7 0415300)	0.1523
West Africa vs South America	4	748262	T	C	0.81926	DHFR-TS (PF3D7 0417200)	0.1808
West Africa vs South America	6	531935	G	A	0.759546	PF3D7 0612900 (PF3D7 0612900)	0.4488
West Africa vs South America	6	575829	A	G	0.788358	ApiAP2 (PF3D7 0613800)	0.4066
West Africa vs South America	7	620660	T	A	0.766824	PF3D7 0713600 (PF3D7 0713600)	0.2945
West Africa vs South America	8	585841	C	G	0.945947	PF3D7 0811600 (PF3D7 0811600)	0.4498
West Africa vs South America	8	585854	A	C	0.896501	PF3D7 0811600 (PF3D7 0811600)	0.4093
West Africa vs South America	8	672242	T	A	0.795217	ABCF1 (PF3D7 0813700)	0.47
West Africa vs South America	8	812561	G	A	0.853593	RON5	0.4888
West Africa vs South America	8	812570	C	T	0.853903	RON5	0.4889
West Africa vs South America	8	812667	G	A	0.807305	RON5 (PF3D7 0817700)	0.4691
West Africa vs South America	8	861388	A	G	0.773676	HSP70 (PF3D7 0818900)	0.4176
West Africa vs South America	9	290285	C	T	0.75906	PF3D7 0905800 (PF3D7 0905800)	0.4622
West Africa vs South America	11	638299	T	G	0.87326	HSP101 (PF3D7 1116800)	0.4931
West Africa vs South America	11	828596	T	C	0.896191	PF3D7 1121800 (PF3D7 1121800)	0.3175
West Africa vs South America	12	1114059	T	C	0.790447	CYC2 (PF3D7 1227500)	0.4993
West Africa vs South America	13	1879488	G	A	0.999303	P47 (PF3D7 1346800)	0.4924
West Africa vs South America	13	2124825	T	A	0.787781	PF3D7 1353100 (PF3D7 1353100)	0.28
West Africa vs South America	13	2422766	A	G	0.868405	GCbeta (PF3D7 1360500)	0.1615
West Africa vs South America	14	161286	G	T	0.860499	PF3D7 1404700 (PF3D7 1404700)	0.347
West Africa vs South America	14	420628	A	G	0.783007	RAP1 (PF3D7 1410400)	0.1839
West Africa vs South America	14	1710253	A	T	0.759664	PF3D7 1442200 (PF3D7 1442200)	0.1109
West Africa vs South America	14	1993471	T	C	0.750095	PF3D7 1448500 (PF3D7 1448500)	0.4155
West Africa vs South Asia	3	618447	A	G	0.75389	CTRP (PF3D7 0315200)	0.3291
West Africa vs South Asia	3	622763	G	C	0.817556	CTRP (PF3D7 0315200)	0.4009
West Africa vs South Asia	3	851156	C	T	0.778879	Cap380 (PF3D7 0320400)	0.4239
West Africa vs South Asia	4	329468	A	T	0.806075	Pfs16 (PF3D7 0406200)	0.4913
West Africa vs South Asia	6	1110981	A	G	0.8674	PF3D7 0627700 (PF3D7 0627700)	0.4753
West Africa vs South Asia	6	1114587	A	T	0.777334	ACS (PF3D7 0627800)	0.3773
West Africa vs South Asia	6	1114625	A	C	0.763166	ACS (PF3D7 0627800)	0.4544
West Africa vs South Asia	6	1114928	A	G	0.850454	ACS (PF3D7 0627800)	0.4704
West Africa vs South Asia	6	1114951	C	T	0.849382	ACS (PF3D7 0627800)	0.4699
West Africa vs South Asia	6	1116314	T	C	0.834465	ACS (PF3D7 0627800)	0.4624
West Africa vs South Asia	6	1117519	A	G	0.825145	ACS (PF3D7 0627800)	0.456
West Africa vs South Asia	7	105304	T	C	0.835243	PF3D7 0702500 (PF3D7 0702500)	0.4706
West Africa vs South Asia	8	585841	C	G	0.857339	PF3D7 0811600 (PF3D7 0811600)	0.4498
West Africa vs South Asia	8	585854	A	C	0.919021	PF3D7 0811600 (PF3D7 0811600)	0.4093
West Africa vs South Asia	9	1179855	A	C	0.785463	RhopH2 (PF3D7 0929400)	0.3811
West Africa vs South Asia	11	638299	T	G	0.948337	HSP101 (PF3D7 1116800)	0.4931
West Africa vs South Asia	11	1006784	T	C	0.750591	PF3D7 1125700 (PF3D7 1125700)	0.4857
West Africa vs South Asia	11	1375988	T	C	0.796349	PPM8 (PF3D7 1135100)	0.4143
West Africa vs South Asia	11	1507877	C	T	0.787335	GCalpha (PF3D7 1138400)	0.4567
West Africa vs South Asia	13	872241	G	A	0.768042	PF3D7 1321100 (PF3D7 1321100)	0.4408
West Africa vs South Asia	13	1879488	G	A	0.851707	P47 (PF3D7 1346800)	0.4924
West Africa vs South Asia	13	2479113	C	G	0.764351	PF3D7 1361800 (PF3D7 1361800)	0.3359
West Africa vs South Asia	13	2481108	C	G	0.916362	PF3D7 1361800 (PF3D7 1361800)	0.3507
West Africa vs South Central Africa	5	1108445	G	T	0.764926	PF3D7 0526600 (PF3D7 0526600)	0.4536
West Africa vs South Central Africa	9	1178963	G	A	0.797471	RhopH2 (PF3D7 0929400)	0.2924
West Africa vs South Central Africa	9	1179228	G	A	0.86752	RhopH2 (PF3D7 0929400)	0.374
West Africa vs South Central Africa	9	1179855	A	C	0.914432	RhopH2 (PF3D7 0929400)	0.3811
West Africa vs South Central Africa	13	2481108	C	G	0.917772	PF3D7 1361800 (PF3D7 1361800)	0.3507
West Africa vs Southeast Asia	1	180379	T	A	0.851219	PF3D7 0104100 (PF3D7 0104100)	0.4388
West Africa vs Southeast Asia	2	319674	G	A	0.95832	SERA2 (PF3D7 0207900)	0.4644
West Africa vs Southeast Asia	2	623146	T	C	0.902544	PF3D7 0215100 (PF3D7 0215100)	0.4705
West Africa vs Southeast Asia	3	70512	C	A	0.778478	ACS2 (PF3D7 0301000)	0.4199
West Africa vs Southeast Asia	3	122810	A	G	0.865379	CLAG3.2 (PF3D7 0302200)	0.4943
West Africa vs Southeast Asia	3	618447	A	G	0.756083	CTRP (PF3D7 0315200)	0.3291
West Africa vs Southeast Asia	3	622763	G	C	0.823543	CTRP (PF3D7 0315200)	0.4009
West Africa vs Southeast Asia	3	851156	C	T	0.808956	Cap380 (PF3D7 0320400)	0.4239
West Africa vs Southeast Asia	4	329468	A	T	0.886264	Pfs16 (PF3D7 0406200)	0.4913
West Africa vs Southeast Asia	4	414221	G	A	0.751424	SIAP1 (PF3D7 0408600)	0.3947
West Africa vs Southeast Asia	4	767099	T	G	0.870352	PF3D7 0417400 (PF3D7 0417400)	0.4823
West Africa vs Southeast Asia	4	856082	A	G	0.857399	PF3D7 0419300 (PF3D7 0419300)	0.4872
West Africa vs Southeast Asia	4	1128627	A	T	0.764537	PF3D7 0424900 (PF3D7 0424900)	0.4616
West Africa vs Southeast Asia	5	382974	T	A	0.768691	PF3D7 0509100 (PF3D7 0509100)	0.4427
West Africa vs Southeast Asia	5	643899	A	G	0.769936	PF3D7 0515500 (PF3D7 0515500)	0.4356
West Africa vs Southeast Asia	5	1108445	G	T	0.82278	PF3D7 0526600 (PF3D7 0526600)	0.4536
West Africa vs Southeast Asia	6	237194	T	G	0.757446	PF3D7 0605700 (PF3D7 0605700)	0.3677
West Africa vs Southeast Asia	6	346856	A	C	0.830648	PF3D7 0608300 (PF3D7 0608300)	0.4309
West Africa vs Southeast Asia	6	404679	T	A	0.852819	PF3D7 0609500 (PF3D7 0609500)	0.4538
West Africa vs Southeast Asia	6	510595	C	T	0.825953	EIF3L (PF3D7 0612100)	0.3884
West Africa vs Southeast Asia	6	531935	G	A	0.84813	PF3D7 0612900 (PF3D7 0612900)	0.4488
West Africa vs Southeast Asia	6	575829	A	G	0.907463	ApiAP2 (PF3D7 0613800)	0.4066
West Africa vs Southeast Asia	6	851736	C	T	0.855036	MSP10 (PF3D7 0620400)	0.4696
West Africa vs Southeast Asia	6	1110981	A	G	0.867886	PF3D7 0627700 (PF3D7 0627700)	0.4753
West Africa vs Southeast Asia	6	1114587	A	T	0.816133	ACS (PF3D7 0627800)	0.3773
West Africa vs Southeast Asia	6	1114625	A	C	0.815157	ACS (PF3D7 0627800)	0.4544
West Africa vs Southeast Asia	6	1114928	A	G	0.860297	ACS (PF3D7 0627800)	0.4704
West Africa vs Southeast Asia	6	1114951	C	T	0.859648	ACS (PF3D7 0627800)	0.4699
West Africa vs Southeast Asia	6	1116314	T	C	0.846022	ACS (PF3D7 0627800)	0.4624
West Africa vs Southeast Asia	6	1117519	A	G	0.82699	ACS (PF3D7 0627800)	0.456
West Africa vs Southeast Asia	6	1141114	G	A	0.752998	PF3D7 0628100 (PF3D7 0628100)	0.346
West Africa vs Southeast Asia	7	105304	T	C	0.95369	PF3D7 0702500 (PF3D7 0702500)	0.4706
West Africa vs Southeast Asia	7	406231	C	T	0.774643	CRT	0.4237
West Africa vs Southeast Asia	7	730268	A	C	0.777973	PF3D7 0716700 (PF3D7 0716700)	0.4731
West Africa vs Southeast Asia	7	816733	A	G	0.835528	CRMP2 (PF3D7 0718300)	0.4299
West Africa vs Southeast Asia	8	585841	C	G	0.886859	PF3D7 0811600 (PF3D7 0811600)	0.4498
West Africa vs Southeast Asia	8	585854	A	C	0.985597	PF3D7 0811600 (PF3D7 0811600)	0.4093
West Africa vs Southeast Asia	8	619138	A	G	0.764267	SSP3 (PF3D7 0812300)	0.454
West Africa vs Southeast Asia	8	812561	G	A	0.893606	RON5	0.4888
West Africa vs Southeast Asia	8	812570	C	T	0.892698	RON5	0.4889
West Africa vs Southeast Asia	8	812667	G	A	0.848834	RON5 (PF3D7 0817700)	0.4691
West Africa vs Southeast Asia	8	861388	A	G	0.784425	HSP70 (PF3D7 0818900)	0.4176
West Africa vs Southeast Asia	8	991389	G	T	0.82053	PF3D7 0822400 (PF3D7 0822400)	0.4443
West Africa vs Southeast Asia	8	1005851	G	C	0.768679	PF3D7 0822800 (PF3D7 0822800)	0.4911
West Africa vs Southeast Asia	9	512326	A	C	0.892302	CRMP1 (PF3D7 0911300)	0.4501
West Africa vs Southeast Asia	9	512739	G	C	0.767762	CRMP1 (PF3D7 0911300)	0.3466
West Africa vs Southeast Asia	9	516978	G	A	0.875735	CRMP1 (PF3D7 0911300)	0.4444
West Africa vs Southeast Asia	9	1054710	T	C	0.792253	PF3D7 0926100 (PF3D7 0926100)	0.3983
West Africa vs Southeast Asia	9	1179855	A	C	0.954511	RhopH2 (PF3D7 0929400)	0.3811
West Africa vs Southeast Asia	9	1406576	G	A	0.856917	GIG (PF3D7 0935600)	0.4711
West Africa vs Southeast Asia	10	325616	A	G	0.780558	HDA2 (PF3D7 1008000)	0.3441
West Africa vs Southeast Asia	11	638299	T	G	0.995993	HSP101 (PF3D7 1116800)	0.4931
West Africa vs Southeast Asia	11	1006784	T	C	0.920283	PF3D7 1125700 (PF3D7 1125700)	0.4857
West Africa vs Southeast Asia	11	1375988	T	C	0.934324	PPM8 (PF3D7 1135100)	0.4143
West Africa vs Southeast Asia	11	1507877	C	T	0.905806	GCalpha (PF3D7 1138400)	0.4567
West Africa vs Southeast Asia	12	1114059	T	C	0.839449	CYC2 (PF3D7 1227500)	0.4993
West Africa vs Southeast Asia	12	1162825	A	C	0.893296	MSP9 (PF3D7 1228600)	0.4934
West Africa vs Southeast Asia	12	1394482	A	G	0.770107	AARP1 (PF3D7 1233600)	0.4661
West Africa vs Southeast Asia	12	2151902	T	C	0.891359	PF3D7 1252600 (PF3D7 1252600)	0.4582
West Africa vs Southeast Asia	13	852849	C	A	0.760729	PF3D7 1320700 (PF3D7 1320700)	0.3475
West Africa vs Southeast Asia	13	872241	G	A	0.810976	PF3D7 1321100 (PF3D7 1321100)	0.4408
West Africa vs Southeast Asia	13	1013674	G	T	0.774945	PF3D7 1324300 (PF3D7 1324300)	0.3201
West Africa vs Southeast Asia	13	1257063	A	G	0.841221	PF3D7 1329500 (PF3D7 1329500)	0.4165
West Africa vs Southeast Asia	13	1697887	T	C	0.813925	PMT (PF3D7 1343000)	0.4451
West Africa vs Southeast Asia	13	1766359	C	G	0.766914	PF3D7 1344100 (PF3D7 1344100)	0.4407
West Africa vs Southeast Asia	13	1858907	C	T	0.780595	PF3D7 1346400 (PF3D7 1346400)	0.4592
West Africa vs Southeast Asia	13	1879488	G	A	0.997555	P47 (PF3D7 1346800)	0.4924
West Africa vs Southeast Asia	13	2124825	T	A	0.789257	PF3D7 1353100 (PF3D7 1353100)	0.28
West Africa vs Southeast Asia	13	2435370	A	T	0.791166	FLN (PF3D7 1360800)	0.4409
West Africa vs Southeast Asia	13	2479113	C	G	0.800999	PF3D7 1361800 (PF3D7 1361800)	0.3359
West Africa vs Southeast Asia	13	2481108	C	G	0.936912	PF3D7 1361800 (PF3D7 1361800)	0.3507
West Africa vs Southeast Asia	14	161286	G	T	0.872164	PF3D7 1404700 (PF3D7 1404700)	0.347
West Africa vs Southeast Asia	14	514157	C	T	0.804785	PF3D7 1412700 (PF3D7 1412700)	0.4782
West Africa vs Southeast Asia	14	683666	G	A	0.757686	PF3D7 1416800 (PF3D7 1416800)	0.4109
West Africa vs Southeast Asia	14	711335	G	A	0.783151	ATG4 (PF3D7 1417300)	0.4891
West Africa vs Southeast Asia	14	922960	A	G	0.813399	PF3D7 1422900 (PF3D7 1422900)	0.497
West Africa vs Southeast Asia	14	1993471	T	C	0.849454	PF3D7 1448500 (PF3D7 1448500)	0.4155
West Africa vs Southeast Asia	14	2364543	A	T	0.830354	PF3D7 1457600 (PF3D7 1457600)	0.4767
West Africa vs Southeast Asia	14	3101577	C	G	0.866757	CRMP4 (PF3D7 1475400)	0.4616
MAF= Minor Allele Frequency

## Sheet: Table S6
Supplementary Table 6. Gene Ontology analysis for biological processes, cellular components and molecular functions for genes with FST scores (pairwise comparisons)
Type	P-value (FDR)	Number of Genes	Pathway Genes	Fold Enrichment	Pathway	Genes
Cellular Component	0.020116	3	4	16.6743	GO:0031233 intrinsic component of external side of plasma membrane	PF3D7_0718300 PF3D7_0911300 PF3D7_1475400
Cellular Component	0.0252097	6	26	5.13055	GO:0046658 anchored component of plasma membrane	PF3D7_0620400 PF3D7_0718300 PF3D7_0911300 PF3D7_1475400 PF3D7_0612800 PF3D7_1346800
Cellular Component	0.020116	8	38	4.6805	GO:0009986 cell surface	PF3D7_0629300 PF3D7_0718300 PF3D7_0911300 PF3D7_1028700 PF3D7_1475400 PF3D7_0612800 PF3D7_1228600 PF3D7_1346800
Cellular Component	0.020116	10	62	3.58587	GO:0020007 apical complex	PF3D7_0302200 PF3D7_0315200 PF3D7_0731500 PF3D7_0817700 PF3D7_0929400 PF3D7_1028700 PF3D7_1116800 PF3D7_1335900 PF3D7_1410400 PF3D7_1436300
Cellular Component	0.0209471	10	64	3.47381	GO:0045177 apical part of cell	PF3D7_0302200 PF3D7_0315200 PF3D7_0731500 PF3D7_0817700 PF3D7_0929400 PF3D7_1028700 PF3D7_1116800 PF3D7_1335900 PF3D7_1410400 PF3D7_1436300
FDR= False Discovery Rate

## Sheet: Table S7
Supplementary Table 7. Single nucleotide polymorphisms with moderate-high FST (>0.75) for pairwise country-level comparisons (MAF>0.1)
Comparison	Chromosome	Position	Reference Allele	Alternative Allele	FST	Gene	Overall MAF
Bangladesh vs Benin	3	618447	A	G	0.759429	CTRP (PF3D7 0315200)	0.3291
Bangladesh vs Benin	3	618708	A	G	0.752499	CTRP (PF3D7 0315200)	0.3053
Bangladesh vs Benin	3	622763	G	C	0.86719	CTRP (PF3D7 0315200)	0.4009
Bangladesh vs Benin	3	851156	C	T	0.778047	Cap380 (PF3D7 0320400)	0.4239
Bangladesh vs Benin	4	329468	A	T	0.911859	Pfs16 (PF3D7 0406200)	0.4913
Bangladesh vs Benin	5	1043474	G	T	0.754938	ACS10 (PF3D7 0525100)	0.488
Bangladesh vs Benin	6	1110981	A	G	0.853204	PF3D7 0627700 (PF3D7 0627700)	0.4753
Bangladesh vs Benin	6	1111541	C	T	0.758727	PF3D7 0627700 (PF3D7 0627700)	0.3828
Bangladesh vs Benin	6	1114587	A	T	0.821546	ACS (PF3D7 0627800)	0.3773
Bangladesh vs Benin	6	1114625	A	C	0.814481	ACS (PF3D7 0627800)	0.4544
Bangladesh vs Benin	6	1114928	A	G	0.850847	ACS (PF3D7 0627800)	0.4704
Bangladesh vs Benin	6	1114951	C	T	0.849801	ACS (PF3D7 0627800)	0.4699
Bangladesh vs Benin	6	1116314	T	C	0.853242	ACS (PF3D7 0627800)	0.4624
Bangladesh vs Benin	6	1117519	A	G	0.850847	ACS (PF3D7 0627800)	0.456
Bangladesh vs Benin	7	105304	T	C	0.832563	PF3D7 0702500 (PF3D7 0702500)	0.4706
Bangladesh vs Benin	8	585841	C	G	0.875202	PF3D7 0811600 (PF3D7 0811600)	0.4498
Bangladesh vs Benin	8	585854	A	C	0.923374	PF3D7 0811600 (PF3D7 0811600)	0.4093
Bangladesh vs Benin	9	1179855	A	C	0.783437	RhopH2 (PF3D7 0929400)	0.3811
Bangladesh vs Benin	11	638299	T	G	0.94379	HSP101 (PF3D7 1116800)	0.4931
Bangladesh vs Benin	11	1006784	T	C	0.760768	PF3D7 1125700 (PF3D7 1125700)	0.4857
Bangladesh vs Benin	11	1375988	T	C	0.789672	PPM8 (PF3D7 1135100)	0.4143
Bangladesh vs Benin	11	1507877	C	T	0.77068	GCalpha (PF3D7 1138400)	0.4567
Bangladesh vs Benin	13	872241	G	A	0.81048	PF3D7 1321100 (PF3D7 1321100)	0.4408
Bangladesh vs Benin	13	1879488	G	A	0.865594	P47 (PF3D7 1346800)	0.4924
Bangladesh vs Benin	13	2479113	C	G	0.810623	PF3D7 1361800 (PF3D7 1361800)	0.3359
Bangladesh vs Benin	13	2481108	C	G	0.948866	PF3D7 1361800 (PF3D7 1361800)	0.3507
Bangladesh vs Benin	14	1666117	T	C	0.785773	PF3D7 1440800 (PF3D7 1440800)	0.3647
Bangladesh vs Benin	14	1993471	T	C	0.760061	PF3D7 1448500 (PF3D7 1448500)	0.4155
Bangladesh vs Brazil	1	114473	T	G	0.855988	EBA181 (PF3D7 0102500)	0.2865
Bangladesh vs Brazil	1	495385	A	G	0.779465	SURF1.1 (PF3D7 0113100)	0.2478
Bangladesh vs Brazil	1	495388	A	G	0.779465	SURF1.1 (PF3D7 0113100)	0.2478
Bangladesh vs Brazil	1	499681	A	T	0.817251	SURF1.1 (PF3D7 0113100)	0.1452
Bangladesh vs Brazil	1	499684	T	G	0.765059	SURF1.1 (PF3D7 0113100)	0.1569
Bangladesh vs Brazil	1	543381	G	A	0.952774	EPF1 (PF3D7 0114000)	0.04504
Bangladesh vs Brazil	2	290673	T	A	0.876873	SERA8 (PF3D7 0207300)	0.3706
Bangladesh vs Brazil	2	339959	C	T	0.853892	PF3D7 0208300 (PF3D7 0208300)	0.2218
Bangladesh vs Brazil	2	366771	G	A	0.866721	P230p (PF3D7 0208900)	0.2606
Bangladesh vs Brazil	2	614624	C	T	0.890307	RON6 ()	0.3229
Bangladesh vs Brazil	3	510000	G	T	0.892786	PF3D7 0311900 (PF3D7 0311900)	0.3991
Bangladesh vs Brazil	3	751699	T	A	0.858268	RPB1 (PF3D7 0318200)	0.4745
Bangladesh vs Brazil	3	849476	C	T	0.979381	Cap380 (PF3D7 0320400)	0.2944
Bangladesh vs Brazil	3	890846	C	T	0.993219	PF3D7 0321300 (PF3D7 0321300)	0.03884
Bangladesh vs Brazil	4	282524	A	T	0.847918	LISP2 (PF3D7 0405300)	0.4245
Bangladesh vs Brazil	4	283484	G	A	0.822607	LISP2 (PF3D7 0405300)	0.4215
Bangladesh vs Brazil	4	329468	A	T	0.945665	Pfs16 (PF3D7 0406200)	0.4913
Bangladesh vs Brazil	4	677644	A	G	0.996002	PF3D7 0415200 (PF3D7 0415200)	0.115
Bangladesh vs Brazil	4	683888	G	A	0.889201	CRK3 (PF3D7 0415300)	0.1523
Bangladesh vs Brazil	4	691961	C	T	0.871263	PF3D7 0415700 (PF3D7 0415700)	0.2948
Bangladesh vs Brazil	4	738775	G	A	0.90116	PF3D7 0416900 (PF3D7 0416900)	0.2703
Bangladesh vs Brazil	4	748262	T	C	0.971657	DHFR-TS (PF3D7 0417200)	0.1808
Bangladesh vs Brazil	4	757119	A	G	0.880734	PF3D7 0417400 (PF3D7 0417400)	0.3289
Bangladesh vs Brazil	4	767099	T	G	0.796407	PF3D7 0417400 (PF3D7 0417400)	0.4823
Bangladesh vs Brazil	4	797761	A	C	0.849741	PF3D7 0418000 (PF3D7 0418000)	0.2948
Bangladesh vs Brazil	4	839310	A	G	0.949016	PF3D7 0418600 (PF3D7 0418600)	0.2204
Bangladesh vs Brazil	4	863561	C	T	0.772928	PF3D7 0419400 (PF3D7 0419400)	0.4831
Bangladesh vs Brazil	4	1121457	C	G	0.989144	FIKK4.2 (PF3D7 0424700)	0.1356
Bangladesh vs Brazil	4	1121472	T	A	0.989948	FIKK4.2 (PF3D7 0424700)	0.1255
Bangladesh vs Brazil	4	1122147	A	C	0.989091	FIKK4.2 (PF3D7 0424700)	0.1593
Bangladesh vs Brazil	5	382974	T	A	0.807294	PF3D7 0509100 (PF3D7 0509100)	0.4427
Bangladesh vs Brazil	5	396039	T	C	0.803538	RNAPI (PF3D7 0509400)	0.2596
Bangladesh vs Brazil	5	679125	C	T	0.817127	PF3D7 0516300 (PF3D7 0516300)	0.3105
Bangladesh vs Brazil	5	796714	A	G	0.780896	PF3D7 0519300 (PF3D7 0519300)	0.3896
Bangladesh vs Brazil	5	908826	G	A	0.85697	PF3D7 0522400 (PF3D7 0522400)	0.2865
Bangladesh vs Brazil	5	929884	A	G	0.856394	PF3D7 0522400 (PF3D7 0522400)	0.2951
Bangladesh vs Brazil	5	930435	C	T	0.809543	PF3D7 0522400 (PF3D7 0522400)	0.4172
Bangladesh vs Brazil	5	949158	A	G	0.948503	PF3D7 0522900 (PF3D7 0522900)	0.2287
Bangladesh vs Brazil	5	958440	A	T	0.811915	MDR1 (PF3D7 0523000)	0.4684
Bangladesh vs Brazil	5	966314	C	A	0.937063	PF3D7 0523200 (PF3D7 0523200)	0.163
Bangladesh vs Brazil	5	1042561	T	G	0.958882	ACS10 (PF3D7 0525100)	0.2959
Bangladesh vs Brazil	5	1043303	G	A	0.937225	ACS10 (PF3D7 0525100)	0.2836
Bangladesh vs Brazil	5	1043474	G	T	0.916433	ACS10 (PF3D7 0525100)	0.488
Bangladesh vs Brazil	5	1185083	G	A	0.87862	PF3D7 0528900 ()	0.3887
Bangladesh vs Brazil	5	1188542	T	C	0.964673	PF3D7 0529000 (PF3D7 0529000)	0.4327
Bangladesh vs Brazil	5	1188659	G	A	0.978586	PF3D7 0529000 (PF3D7 0529000)	0.2608
Bangladesh vs Brazil	6	182965	T	C	0.81387	PF3D7 0604300 (PF3D7 0604300)	0.3279
Bangladesh vs Brazil	6	389754	A	G	0.847505	PF3D7 0609100 (PF3D7 0609100)	0.4064
Bangladesh vs Brazil	6	482969	G	A	0.996788	PF3D7 0611500 (PF3D7 0611500)	0.1406
Bangladesh vs Brazil	6	528066	T	A	0.825289	P12p (PF3D7 0612800)	0.3696
Bangladesh vs Brazil	6	825473	G	T	0.767451	PF3D7 0619600 (PF3D7 0619600)	0.4755
Bangladesh vs Brazil	6	825888	T	C	0.82782	PF3D7 0619600 (PF3D7 0619600)	0.3218
Bangladesh vs Brazil	6	834400	G	A	0.86012	PF3D7 0619800 (PF3D7 0619800)	0.4618
Bangladesh vs Brazil	6	834448	T	A	0.836874	PF3D7 0619800 (PF3D7 0619800)	0.463
Bangladesh vs Brazil	6	851736	C	T	0.850979	MSP10 (PF3D7 0620400)	0.4696
Bangladesh vs Brazil	6	851979	A	G	0.829142	MSP10 (PF3D7 0620400)	0.3484
Bangladesh vs Brazil	6	1110981	A	G	0.9992	PF3D7 0627700 (PF3D7 0627700)	0.4753
Bangladesh vs Brazil	6	1111541	C	T	0.999598	PF3D7 0627700 (PF3D7 0627700)	0.3828
Bangladesh vs Brazil	6	1114625	A	C	0.993153	ACS (PF3D7 0627800)	0.4544
Bangladesh vs Brazil	6	1114928	A	G	1	ACS (PF3D7 0627800)	0.4704
Bangladesh vs Brazil	6	1114951	C	T	0.999193	ACS (PF3D7 0627800)	0.4699
Bangladesh vs Brazil	6	1116314	T	C	1	ACS (PF3D7 0627800)	0.4624
Bangladesh vs Brazil	6	1117519	A	G	1	ACS (PF3D7 0627800)	0.456
Bangladesh vs Brazil	6	1206227	A	T	0.907385	PL (PF3D7 0629300)	0.3303
Bangladesh vs Brazil	6	1224777	T	A	0.937027	SET1 (PF3D7 0629700)	0.2436
Bangladesh vs Brazil	7	270957	G	A	0.905882	PF3D7 0705500 (PF3D7 0705500)	0.3824
Bangladesh vs Brazil	7	375339	A	G	0.812526	PF3D7 0708200 (PF3D7 0708200)	0.3444
Bangladesh vs Brazil	7	378669	G	A	0.911049	BUD32 (PF3D7 0708300)	0.2633
Bangladesh vs Brazil	7	383166	C	T	0.911824	HSP90 ()	0.3432
Bangladesh vs Brazil	7	383527	T	C	0.991111	HSP90 ()	0.1849
Bangladesh vs Brazil	7	403337	G	T	0.951981	CRT ()	0.3022
Bangladesh vs Brazil	7	404836	C	G	0.929172	CRT (PF3D7 0709000)	0.4596
Bangladesh vs Brazil	7	419410	G	A	0.766975	CG2 (PF3D7 0709300)	0.3449
Bangladesh vs Brazil	7	419413	A	G	0.76676	CG2 (PF3D7 0709300)	0.3458
Bangladesh vs Brazil	7	419603	T	A	0.793352	CG2 (PF3D7 0709300)	0.299
Bangladesh vs Brazil	7	421420	G	A	0.772309	CG2 (PF3D7 0709300)	0.4815
Bangladesh vs Brazil	7	451514	T	C	0.764682	PF3D7 0710000 (PF3D7 0710000)	0.367
Bangladesh vs Brazil	7	451640	T	G	0.818907	PF3D7 0710000 (PF3D7 0710000)	0.2668
Bangladesh vs Brazil	7	455798	G	A	0.860297	PF3D7 0710000 ()	0.3187
Bangladesh vs Brazil	7	466431	A	T	0.804499	PF3D7 0710200 (PF3D7 0710200)	0.4127
Bangladesh vs Brazil	7	473039	A	T	0.810868	PF3D7 0710300 ()	0.1983
Bangladesh vs Brazil	7	473203	G	A	0.831875	PF3D7 0710300 (PF3D7 0710300)	0.1905
Bangladesh vs Brazil	7	473334	A	T	0.908431	PF3D7 0710300 ()	0.155
Bangladesh vs Brazil	7	473404	T	A	0.89393	PF3D7 0710300 ()	0.1673
Bangladesh vs Brazil	7	474754	A	G	0.814712	RAD14 (PF3D7 0710400)	0.1999
Bangladesh vs Brazil	7	815129	T	C	0.855416	CRMP2 (PF3D7 0718300)	0.3475
Bangladesh vs Brazil	7	816733	A	G	0.779734	CRMP2 (PF3D7 0718300)	0.4299
Bangladesh vs Brazil	7	866181	A	G	0.982301	PF3D7 0719900 (PF3D7 0719900)	0.09178
Bangladesh vs Brazil	7	1362917	T	A	0.855764	EBA175 (PF3D7 0731500)	0.3505
Bangladesh vs Brazil	7	1362925	A	T	0.869078	EBA175 (PF3D7 0731500)	0.3016
Bangladesh vs Brazil	8	423537	C	T	0.75353	SEC28 (PF3D7 0808400)	0.3078
Bangladesh vs Brazil	8	489611	A	T	0.889644	PF3D7 0809600 (PF3D7 0809600)	0.2728
Bangladesh vs Brazil	8	492502	T	A	0.75829	PF3D7 0809600 (PF3D7 0809600)	0.2773
Bangladesh vs Brazil	8	505739	A	G	0.787963	PF3D7 0809800 (PF3D7 0809800)	0.2991
Bangladesh vs Brazil	8	546841	T	A	0.806996	PF3D7 0810700 (PF3D7 0810700)	0.3744
Bangladesh vs Brazil	8	619138	A	G	0.808109	SSP3 (PF3D7 0812300)	0.454
Bangladesh vs Brazil	8	752747	A	G	0.926381	PF3D7 0816300 (PF3D7 0816300)	0.1372
Bangladesh vs Brazil	8	845787	T	A	0.984045	PBLP (PF3D7 0818600)	0.2441
Bangladesh vs Brazil	8	846225	G	T	0.871251	PBLP (PF3D7 0818600)	0.4252
Bangladesh vs Brazil	8	882476	A	G	0.995202	PF3D7 0819500 ()	0.09139
Bangladesh vs Brazil	8	1167885	C	T	0.826747	DBP10 (PF3D7 0827000)	0.2631
Bangladesh vs Brazil	8	1383640	A	G	0.791803	PF3D7 0832000 (PF3D7 0832000)	0.2105
Bangladesh vs Brazil	9	231065	C	A	0.889561	CuTP (PF3D7 0904900)	0.2482
Bangladesh vs Brazil	9	283868	A	G	0.75489	WDR66 (PF3D7 0905600)	0.4969
Bangladesh vs Brazil	9	492627	C	T	0.885646	ALP5a (PF3D7 0910700)	0.3887
Bangladesh vs Brazil	9	512326	A	C	0.779418	CRMP1 (PF3D7 0911300)	0.4501
Bangladesh vs Brazil	9	516978	G	A	0.860967	CRMP1 (PF3D7 0911300)	0.4444
Bangladesh vs Brazil	9	597897	A	G	0.759859	PF3D7 0914000 (PF3D7 0914000)	0.4984
Bangladesh vs Brazil	9	828981	A	G	0.929454	PF3D7 0920200 (PF3D7 0920200)	0.1593
Bangladesh vs Brazil	9	850295	T	A	0.881532	PF3D7 0920700 (PF3D7 0920700)	0.337
Bangladesh vs Brazil	9	1078816	T	A	0.757807	PF3D7 0926500 (PF3D7 0926500)	0.493
Bangladesh vs Brazil	9	1084846	A	C	0.903498	PF3D7 0926600 (PF3D7 0926600)	0.23
Bangladesh vs Brazil	9	1179855	A	C	0.845291	RhopH2 (PF3D7 0929400)	0.3811
Bangladesh vs Brazil	10	444064	A	G	0.876849	PF3D7 1011500 (PF3D7 1011500)	0.3266
Bangladesh vs Brazil	10	605295	T	A	0.802732	PF3D7 1014900 (PF3D7 1014900)	0.4687
Bangladesh vs Brazil	10	662320	T	C	0.957285	PF3D7 1016500 (PF3D7 1016500)	0.3245
Bangladesh vs Brazil	10	663646	T	C	0.967474	PF3D7 1016500 (PF3D7 1016500)	0.1059
Bangladesh vs Brazil	10	669306	C	T	0.888642	PF3D7 1016700 (PF3D7 1016700)	0.2819
Bangladesh vs Brazil	10	817457	C	T	0.853727	PF3D7 1020200 (PF3D7 1020200)	0.2634
Bangladesh vs Brazil	10	862077	G	C	0.915768	PF3D7 1021300 (PF3D7 1021300)	0.3556
Bangladesh vs Brazil	10	1111441	T	C	0.865839	CDC20 (PF3D7 1026400)	0.362
Bangladesh vs Brazil	10	1391602	A	C	0.921661	PF3D7 1035100 (PF3D7 1035100)	0.0782
Bangladesh vs Brazil	11	307361	G	A	0.982065	PAIP1 (PF3D7 1107300)	0.1506
Bangladesh vs Brazil	11	360271	C	T	0.77431	PF3D7 1108100 ()	0.1881
Bangladesh vs Brazil	11	408600	A	C	0.783338	PRPF6 (PF3D7 1110200)	0.3658
Bangladesh vs Brazil	11	408668	T	A	0.779252	PRPF6 (PF3D7 1110200)	0.3826
Bangladesh vs Brazil	11	410610	G	T	0.808512	PF3D7 1110300 (PF3D7 1110300)	0.3059
Bangladesh vs Brazil	11	410739	A	G	0.82529	PF3D7 1110300 ()	0.2113
Bangladesh vs Brazil	11	565295	G	A	0.909236	PF3D7 1114900 (PF3D7 1114900)	0.3378
Bangladesh vs Brazil	11	1006784	T	C	0.867335	PF3D7 1125700 (PF3D7 1125700)	0.4857
Bangladesh vs Brazil	11	1038075	C	T	0.755281	PF3D7 1126600 (PF3D7 1126600)	0.3594
Bangladesh vs Brazil	11	1507877	C	T	0.919632	GCalpha (PF3D7 1138400)	0.4567
Bangladesh vs Brazil	11	1594572	G	A	0.869964	PF3D7 1139900 ()	0.4756
Bangladesh vs Brazil	12	49704	A	T	0.821355	VAR2CSA (PF3D7 1200600)	0.1717
Bangladesh vs Brazil	12	49887	G	T	0.754541	VAR2CSA (PF3D7 1200600)	0.3684
Bangladesh vs Brazil	12	49892	T	A	0.771135	VAR2CSA (PF3D7 1200600)	0.3633
Bangladesh vs Brazil	12	50435	T	G	0.813298	VAR2CSA (PF3D7 1200600)	0.2565
Bangladesh vs Brazil	12	51329	T	C	0.804027	VAR2CSA (PF3D7 1200600)	0.3054
Bangladesh vs Brazil	12	52903	C	T	0.754296	VAR2CSA (PF3D7 1200600)	0.3504
Bangladesh vs Brazil	12	52935	T	G	0.875759	VAR2CSA (PF3D7 1200600)	0.1835
Bangladesh vs Brazil	12	53139	G	A	0.781499	VAR2CSA (PF3D7 1200600)	0.2941
Bangladesh vs Brazil	12	63393	G	A	0.878131	ACS7 (PF3D7 1200700)	0.1907
Bangladesh vs Brazil	12	95417	T	A	0.827753	PF3D7 1201400 (PF3D7 1201400)	0.3774
Bangladesh vs Brazil	12	836994	T	C	0.908102	SET10 (PF3D7 1221000)	0.3953
Bangladesh vs Brazil	12	907264	A	G	0.854807	AP2-G (PF3D7 1222600)	0.1695
Bangladesh vs Brazil	12	1162825	A	C	0.882847	MSP9 (PF3D7 1228600)	0.4934
Bangladesh vs Brazil	12	1194636	A	T	0.826426	MRP2 (PF3D7 1229100)	0.2522
Bangladesh vs Brazil	12	1839613	T	G	0.7505	DOC2 (PF3D7 1243900)	0.4349
Bangladesh vs Brazil	12	2151902	T	C	0.82515	PF3D7 1252600 (PF3D7 1252600)	0.4582
Bangladesh vs Brazil	13	366999	G	T	0.941224	cpsSII (PF3D7 1308200)	0.1949
Bangladesh vs Brazil	13	445694	C	T	0.920895	PF3D7 1309800 (PF3D7 1309800)	0.2115
Bangladesh vs Brazil	13	614769	T	A	0.890781	TERT (PF3D7 1314200)	0.1974
Bangladesh vs Brazil	13	872241	G	A	0.968812	PF3D7 1321100 (PF3D7 1321100)	0.4408
Bangladesh vs Brazil	13	1257063	A	G	0.766883	PF3D7 1329500 (PF3D7 1329500)	0.4165
Bangladesh vs Brazil	13	1466351	G	A	0.808912	TRAP (PF3D7 1335900)	0.3763
Bangladesh vs Brazil	13	1858907	C	T	0.871458	PF3D7 1346400 (PF3D7 1346400)	0.4592
Bangladesh vs Brazil	13	2070556	T	G	0.78483	PF3D7 1352000 (PF3D7 1352000)	0.3288
Bangladesh vs Brazil	13	2179835	G	C	0.972876	PF3D7 1354700 (PF3D7 1354700)	0.3946
Bangladesh vs Brazil	13	2266147	G	A	0.794401	PF3D7 1357000 (PF3D7 1357000)	0.3082
Bangladesh vs Brazil	13	2266150	C	T	0.791998	PF3D7 1357000 (PF3D7 1357000)	0.3086
Bangladesh vs Brazil	13	2342841	A	T	0.879566	PF3D7 1359000 (PF3D7 1359000)	0.3689
Bangladesh vs Brazil	13	2422766	A	G	0.980392	GCbeta (PF3D7 1360500)	0.1615
Bangladesh vs Brazil	13	2435370	A	T	0.836617	FLN (PF3D7 1360800)	0.4409
Bangladesh vs Brazil	13	2479113	C	G	0.972317	PF3D7 1361800 (PF3D7 1361800)	0.3359
Bangladesh vs Brazil	13	2824570	G	A	0.805833	PF3D7 1371800 (PF3D7 1371800)	0.318
Bangladesh vs Brazil	13	2824624	C	T	0.839122	PF3D7 1371800 (PF3D7 1371800)	0.2665
Bangladesh vs Brazil	14	420628	A	G	0.995979	RAP1 (PF3D7 1410400)	0.1839
Bangladesh vs Brazil	14	478047	G	C	0.850657	PF3D7 1411800 (PF3D7 1411800)	0.2412
Bangladesh vs Brazil	14	711335	G	A	0.756512	ATG4 (PF3D7 1417300)	0.4891
Bangladesh vs Brazil	14	1307328	A	G	0.81387	PF3D7 1433200 (PF3D7 1433200)	0.2984
Bangladesh vs Brazil	14	1480458	A	T	0.845419	PTEX150 (PF3D7 1436300)	0.3671
Bangladesh vs Brazil	14	1562642	T	A	0.815674	PF3D7 1438600 (PF3D7 1438600)	0.4934
Bangladesh vs Brazil	14	1665655	G	T	0.970905	PF3D7 1440800 (PF3D7 1440800)	0.2395
Bangladesh vs Brazil	14	1666117	T	C	0.912714	PF3D7 1440800 (PF3D7 1440800)	0.3647
Bangladesh vs Brazil	14	1710253	A	T	0.891867	PF3D7 1442200 (PF3D7 1442200)	0.1109
Bangladesh vs Brazil	14	1748662	G	T	0.786204	PF3D7 1442700 (PF3D7 1442700)	0.4921
Bangladesh vs Brazil	14	1770207	T	C	0.966122	PF3D7 1443100 (PF3D7 1443100)	0.1937
Bangladesh vs Brazil	14	1912280	G	A	0.828821	PF3D7 1446500 (PF3D7 1446500)	0.3396
Bangladesh vs Brazil	14	2733656	C	T	0.873727	PF3D7 1466800 (PF3D7 1466800)	0.4186
Bangladesh vs Brazil	14	3100739	A	C	0.7762	CRMP4 (PF3D7 1475400)	0.417
Bangladesh vs Brazil	14	3126183	T	C	0.978655	PF3D7 1475900 (PF3D7 1475900)	0.1439
Bangladesh vs Colombia	2	109659	T	C	0.96331	LSAP2 (PF3D7 0202100)	0.3602
Bangladesh vs Colombia	2	166372	T	C	0.770387	PF3D7 0203600 (PF3D7 0203600)	0.4179
Bangladesh vs Colombia	2	623146	T	C	0.752495	PF3D7 0215100 (PF3D7 0215100)	0.4705
Bangladesh vs Colombia	3	383262	A	G	0.758175	SF3B1 (PF3D7 0308900)	0.2257
Bangladesh vs Colombia	4	738775	G	A	0.892261	PF3D7 0416900 (PF3D7 0416900)	0.2703
Bangladesh vs Colombia	4	748262	T	C	0.971657	DHFR-TS (PF3D7 0417200)	0.1808
Bangladesh vs Colombia	4	757119	A	G	0.880734	PF3D7 0417400 (PF3D7 0417400)	0.3289
Bangladesh vs Colombia	4	763069	A	C	0.830648	PF3D7 0417400 (PF3D7 0417400)	0.2076
Bangladesh vs Colombia	4	797761	A	C	0.801565	PF3D7 0418000 (PF3D7 0418000)	0.2948
Bangladesh vs Colombia	4	856082	A	G	0.76426	PF3D7 0419300 (PF3D7 0419300)	0.4872
Bangladesh vs Colombia	4	1034437	A	T	0.856849	BRR2 (PF3D7 0422500)	0.1607
Bangladesh vs Colombia	5	288839	C	A	0.807451	ROM4 (PF3D7 0506900)	0.2316
Bangladesh vs Colombia	5	550976	G	C	0.760476	PF3D7 0512800 (PF3D7 0512800)	0.3286
Bangladesh vs Colombia	5	706173	T	A	0.908392	ApiAP2 (PF3D7 0516800)	0.1881
Bangladesh vs Colombia	5	958440	A	T	0.834605	MDR1 (PF3D7 0523000)	0.4684
Bangladesh vs Colombia	5	1043303	G	A	0.937225	ACS10 (PF3D7 0525100)	0.2836
Bangladesh vs Colombia	5	1043474	G	T	0.916433	ACS10 (PF3D7 0525100)	0.488
Bangladesh vs Colombia	5	1188542	T	C	0.964673	PF3D7 0529000 (PF3D7 0529000)	0.4327
Bangladesh vs Colombia	6	237194	T	G	0.810963	PF3D7 0605700 (PF3D7 0605700)	0.3677
Bangladesh vs Colombia	6	312414	G	C	0.804774	COQ2 (PF3D7 0607500)	0.2499
Bangladesh vs Colombia	6	825473	G	T	0.767451	PF3D7 0619600 (PF3D7 0619600)	0.4755
Bangladesh vs Colombia	6	1011446	A	T	0.999201	PF3D7 0624800 (PF3D7 0624800)	0.03298
Bangladesh vs Colombia	6	1040344	G	A	0.983994	PF3D7 0625600 (PF3D7 0625600)	0.1671
Bangladesh vs Colombia	6	1110981	A	G	0.991753	PF3D7 0627700 (PF3D7 0627700)	0.4753
Bangladesh vs Colombia	6	1114587	A	T	0.998385	ACS (PF3D7 0627800)	0.3773
Bangladesh vs Colombia	6	1114625	A	C	0.993153	ACS (PF3D7 0627800)	0.4544
Bangladesh vs Colombia	6	1114928	A	G	0.992565	ACS (PF3D7 0627800)	0.4704
Bangladesh vs Colombia	6	1114951	C	T	0.999193	ACS (PF3D7 0627800)	0.4699
Bangladesh vs Colombia	6	1116314	T	C	1	ACS (PF3D7 0627800)	0.4624
Bangladesh vs Colombia	6	1117519	A	G	1	ACS (PF3D7 0627800)	0.456
Bangladesh vs Colombia	6	1141114	G	A	0.960759	PF3D7 0628100 (PF3D7 0628100)	0.346
Bangladesh vs Colombia	6	1206227	A	T	0.907385	PL (PF3D7 0629300)	0.3303
Bangladesh vs Colombia	6	1224777	T	A	0.937027	SET1 (PF3D7 0629700)	0.2436
Bangladesh vs Colombia	6	1266213	T	A	0.771997	PF3D7 0630300 (PF3D7 0630300)	0.07475
Bangladesh vs Colombia	6	1266308	A	T	0.892469	PF3D7 0630300 (PF3D7 0630300)	0.1046
Bangladesh vs Colombia	7	105304	T	C	0.870865	PF3D7 0702500 (PF3D7 0702500)	0.4706
Bangladesh vs Colombia	7	383166	C	T	0.911824	HSP90 ()	0.3432
Bangladesh vs Colombia	7	397135	T	C	0.991563	HSP110c (PF3D7 0708800)	0.06523
Bangladesh vs Colombia	7	404836	C	G	0.929172	CRT (PF3D7 0709000)	0.4596
Bangladesh vs Colombia	7	406231	C	T	0.831003	CRT ()	0.4237
Bangladesh vs Colombia	7	415137	C	T	0.982779	CG2 (PF3D7 0709300)	0.1794
Bangladesh vs Colombia	7	415245	G	A	0.984782	CG2 (PF3D7 0709300)	0.1559
Bangladesh vs Colombia	7	415250	T	C	0.98477	CG2 (PF3D7 0709300)	0.1563
Bangladesh vs Colombia	7	421420	G	A	0.772309	CG2 (PF3D7 0709300)	0.4815
Bangladesh vs Colombia	7	433519	A	T	0.948089	POP1 (PF3D7 0709600)	0.08528
Bangladesh vs Colombia	7	433609	A	T	0.943707	POP1 (PF3D7 0709600)	0.119
Bangladesh vs Colombia	7	455798	G	A	0.860297	PF3D7 0710000 ()	0.3187
Bangladesh vs Colombia	7	815129	T	C	0.855416	CRMP2 (PF3D7 0718300)	0.3475
Bangladesh vs Colombia	7	816733	A	G	0.779734	CRMP2 (PF3D7 0718300)	0.4299
Bangladesh vs Colombia	7	842326	A	T	0.847226	NEK4 ()	0.2185
Bangladesh vs Colombia	7	1196326	A	T	0.856692	PF3D7 0728100 (PF3D7 0728100)	0.2028
Bangladesh vs Colombia	8	489611	A	T	0.817265	PF3D7 0809600 (PF3D7 0809600)	0.2728
Bangladesh vs Colombia	8	546841	T	A	0.806996	PF3D7 0810700 (PF3D7 0810700)	0.3744
Bangladesh vs Colombia	9	492627	C	T	0.858279	ALP5a (PF3D7 0910700)	0.3887
Bangladesh vs Colombia	9	516978	G	A	0.860967	CRMP1 (PF3D7 0911300)	0.4444
Bangladesh vs Colombia	9	1015339	T	C	0.782445	PF3D7 0925100 (PF3D7 0925100)	0.254
Bangladesh vs Colombia	9	1078816	T	A	0.803593	PF3D7 0926500 (PF3D7 0926500)	0.493
Bangladesh vs Colombia	9	1084846	A	C	0.894633	PF3D7 0926600 (PF3D7 0926600)	0.23
Bangladesh vs Colombia	9	1179228	G	A	0.922788	RhopH2 (PF3D7 0929400)	0.374
Bangladesh vs Colombia	10	444064	A	G	0.876849	PF3D7 1011500 (PF3D7 1011500)	0.3266
Bangladesh vs Colombia	10	558456	C	A	0.926889	PF3D7 1014100 (PF3D7 1014100)	0.2466
Bangladesh vs Colombia	10	662320	T	C	0.957285	PF3D7 1016500 (PF3D7 1016500)	0.3245
Bangladesh vs Colombia	10	862077	G	C	0.907085	PF3D7 1021300 (PF3D7 1021300)	0.3556
Bangladesh vs Colombia	10	1111441	T	C	0.781396	CDC20 (PF3D7 1026400)	0.362
Bangladesh vs Colombia	10	1449646	G	A	0.818802	PF3D7 1036800 (PF3D7 1036800)	0.1156
Bangladesh vs Colombia	11	638299	T	G	0.943071	HSP101 (PF3D7 1116800)	0.4931
Bangladesh vs Colombia	11	1375988	T	C	0.77234	PPM8 (PF3D7 1135100)	0.4143
Bangladesh vs Colombia	11	1543336	C	T	0.775814	PF3D7 1138900 (PF3D7 1138900)	0.2606
Bangladesh vs Colombia	12	476635	G	C	0.750413	PF3D7 1210700 (PF3D7 1210700)	0.4509
Bangladesh vs Colombia	12	659788	G	A	0.898029	CelTOS (PF3D7 1216600)	0.3674
Bangladesh vs Colombia	12	1162825	A	C	0.837067	MSP9 (PF3D7 1228600)	0.4934
Bangladesh vs Colombia	12	1184925	A	G	0.865408	PF3D7 1228900 (PF3D7 1228900)	0.317
Bangladesh vs Colombia	12	1552084	T	C	0.75919	PF3D7 1237200 (PF3D7 1237200)	0.07051
Bangladesh vs Colombia	12	1559859	T	A	0.765912	PF3D7 1237400 (PF3D7 1237400)	0.1621
Bangladesh vs Colombia	13	512590	A	G	0.753091	MCAT (PF3D7 1312000)	0.341
Bangladesh vs Colombia	13	738765	A	T	0.769216	PF3D7 1317700 (PF3D7 1317700)	0.06471
Bangladesh vs Colombia	13	743560	C	T	0.791102	PF3D7 1317900 (PF3D7 1317900)	0.29
Bangladesh vs Colombia	13	872241	G	A	0.91354	PF3D7 1321100 (PF3D7 1321100)	0.4408
Bangladesh vs Colombia	13	944480	G	C	0.873673	PF3D7 1322300 (PF3D7 1322300)	0.3185
Bangladesh vs Colombia	13	1257063	A	G	0.812126	PF3D7 1329500 (PF3D7 1329500)	0.4165
Bangladesh vs Colombia	13	1466351	G	A	0.808912	TRAP (PF3D7 1335900)	0.3763
Bangladesh vs Colombia	13	1697887	T	C	0.775873	PMT (PF3D7 1343000)	0.4451
Bangladesh vs Colombia	13	1766359	C	G	0.822729	PF3D7 1344100 (PF3D7 1344100)	0.4407
Bangladesh vs Colombia	13	2257919	C	A	0.945279	ARK3 (PF3D7 1356800)	0.0677
Bangladesh vs Colombia	13	2408374	C	T	0.798698	EMC3 (PF3D7 1360200)	0.07644
Bangladesh vs Colombia	13	2422766	A	G	0.802753	GCbeta (PF3D7 1360500)	0.1615
Bangladesh vs Colombia	13	2435370	A	T	0.902694	FLN (PF3D7 1360800)	0.4409
Bangladesh vs Colombia	13	2479113	C	G	0.886037	PF3D7 1361800 (PF3D7 1361800)	0.3359
Bangladesh vs Colombia	14	47725	G	T	0.753943	PF3D7 1401200 (PF3D7 1401200)	0.1915
Bangladesh vs Colombia	14	448939	T	C	0.871152	PF3D7 1411100 (PF3D7 1411100)	0.3448
Bangladesh vs Colombia	14	922960	A	G	0.825388	PF3D7 1422900 (PF3D7 1422900)	0.497
Bangladesh vs Colombia	14	1542768	C	A	0.852203	SEC62 ()	0.4039
Bangladesh vs Colombia	14	1562642	T	A	0.815674	PF3D7 1438600 (PF3D7 1438600)	0.4934
Bangladesh vs Colombia	14	1665655	G	T	0.970905	PF3D7 1440800 (PF3D7 1440800)	0.2395
Bangladesh vs Colombia	14	1666117	T	C	0.912714	PF3D7 1440800 (PF3D7 1440800)	0.3647
Bangladesh vs Colombia	14	1912280	G	A	0.870333	PF3D7 1446500 (PF3D7 1446500)	0.3396
Bangladesh vs Colombia	14	1993471	T	C	0.871841	PF3D7 1448500 (PF3D7 1448500)	0.4155
Bangladesh vs Colombia	14	2020795	C	T	0.798104	MUS81 (PF3D7 1449400)	0.402
Bangladesh vs Colombia	14	2185421	G	T	0.806437	PF3D7 1453200 (PF3D7 1453200)	0.3849
Bangladesh vs Colombia	14	2364543	A	T	0.864349	PF3D7 1457600 (PF3D7 1457600)	0.4767
Bangladesh vs Colombia	14	2755887	T	A	0.879134	PF3D7 1467500 (PF3D7 1467500)	0.3293
Bangladesh vs Colombia	14	2792758	G	T	0.974697	PF3D7 1468100 (PF3D7 1468100)	0.2371
Bangladesh vs Democratic Republic of the Congo	3	622763	G	C	0.836461	CTRP (PF3D7 0315200)	0.4009
Bangladesh vs Democratic Republic of the Congo	3	851156	C	T	0.760817	Cap380 (PF3D7 0320400)	0.4239
Bangladesh vs Democratic Republic of the Congo	5	1043474	G	T	0.823463	ACS10 (PF3D7 0525100)	0.488
Bangladesh vs Democratic Republic of the Congo	8	585854	A	C	0.783709	PF3D7 0811600 (PF3D7 0811600)	0.4093
Bangladesh vs Democratic Republic of the Congo	11	638299	T	G	0.951229	HSP101 (PF3D7 1116800)	0.4931
Bangladesh vs Democratic Republic of the Congo	13	872241	G	A	0.774508	PF3D7 1321100 (PF3D7 1321100)	0.4408
Bangladesh vs Democratic Republic of the Congo	13	1879488	G	A	0.865594	P47 (PF3D7 1346800)	0.4924
Bangladesh vs Democratic Republic of the Congo	13	2435370	A	T	0.792146	FLN (PF3D7 1360800)	0.4409
Bangladesh vs Democratic Republic of the Congo	14	1480458	A	T	0.818687	PTEX150 (PF3D7 1436300)	0.3671
Bangladesh vs Ecuador	1	155977	G	A	0.89614	PF3D7 0103500 (PF3D7 0103500)	0.1454
Bangladesh vs Ecuador	1	155978	C	T	0.89614	PF3D7 0103500 (PF3D7 0103500)	0.1452
Bangladesh vs Ecuador	1	180186	A	G	0.769279	PF3D7 0104100 (PF3D7 0104100)	0.1252
Bangladesh vs Ecuador	1	339436	A	G	0.84372	PF3D7 0108300 (PF3D7 0108300)	0.2759
Bangladesh vs Ecuador	1	487057	C	T	0.777965	PF3D7 0112900 (PF3D7 0112900)	0.2625
Bangladesh vs Ecuador	1	531103	T	A	0.750205	PF3D7 0113800 (PF3D7 0113800)	0.1903
Bangladesh vs Ecuador	2	109634	G	C	0.759124	LSAP2 (PF3D7 0202100)	0.3728
Bangladesh vs Ecuador	2	109659	T	C	0.978808	LSAP2 (PF3D7 0202100)	0.3602
Bangladesh vs Ecuador	2	166372	T	C	0.78786	PF3D7 0203600 (PF3D7 0203600)	0.4179
Bangladesh vs Ecuador	2	623146	T	C	0.752495	PF3D7 0215100 (PF3D7 0215100)	0.4705
Bangladesh vs Ecuador	2	840040	C	A	0.756497	CLAG2 (PF3D7 0220800)	0.2331
Bangladesh vs Ecuador	3	122376	T	C	0.809909	CLAG3.2 (PF3D7 0302200)	0.3085
Bangladesh vs Ecuador	3	123737	C	A	0.976259	CLAG3.2 (PF3D7 0302200)	0.141
Bangladesh vs Ecuador	3	140282	A	T	0.92078	CLAG3.1 (PF3D7 0302500)	0.1713
Bangladesh vs Ecuador	3	354502	C	T	0.862285	PF3D7 0308000 (PF3D7 0308000)	0.05498
Bangladesh vs Ecuador	3	510000	G	T	0.798026	PF3D7 0311900 (PF3D7 0311900)	0.3991
Bangladesh vs Ecuador	3	851156	C	T	0.924913	Cap380 (PF3D7 0320400)	0.4239
Bangladesh vs Ecuador	3	888900	C	A	0.853628	ALG7 (PF3D7 0321200)	0.2775
Bangladesh vs Ecuador	4	283484	G	A	0.844586	LISP2 (PF3D7 0405300)	0.4215
Bangladesh vs Ecuador	4	329468	A	T	0.758348	Pfs16 (PF3D7 0406200)	0.4913
Bangladesh vs Ecuador	4	415698	A	G	0.779072	SIAP1 (PF3D7 0408600)	0.1313
Bangladesh vs Ecuador	4	738775	G	A	0.90116	PF3D7 0416900 (PF3D7 0416900)	0.2703
Bangladesh vs Ecuador	4	748262	T	C	0.971657	DHFR-TS (PF3D7 0417200)	0.1808
Bangladesh vs Ecuador	4	748410	G	A	0.853525	DHFR-TS (PF3D7 0417200)	0.07098
Bangladesh vs Ecuador	4	757119	A	G	0.838887	PF3D7 0417400 (PF3D7 0417400)	0.3289
Bangladesh vs Ecuador	4	763069	A	C	0.776255	PF3D7 0417400 (PF3D7 0417400)	0.2076
Bangladesh vs Ecuador	4	856082	A	G	0.76426	PF3D7 0419300 (PF3D7 0419300)	0.4872
Bangladesh vs Ecuador	4	989342	C	T	0.797068	PF3D7 0421700 (PF3D7 0421700)	0.1328
Bangladesh vs Ecuador	4	1034437	A	T	0.8929	BRR2 (PF3D7 0422500)	0.1607
Bangladesh vs Ecuador	5	288839	C	A	0.872529	ROM4 (PF3D7 0506900)	0.2316
Bangladesh vs Ecuador	5	550976	G	C	0.771291	PF3D7 0512800 (PF3D7 0512800)	0.3286
Bangladesh vs Ecuador	5	643899	A	G	0.792755	PF3D7 0515500 (PF3D7 0515500)	0.4356
Bangladesh vs Ecuador	5	672685	T	C	0.777721	ATPase1 (PF3D7 0516100)	0.1218
Bangladesh vs Ecuador	5	706173	T	A	0.925468	ApiAP2 (PF3D7 0516800)	0.1881
Bangladesh vs Ecuador	5	901719	G	T	0.857815	TAF10 (PF3D7 0522200)	0.01777
Bangladesh vs Ecuador	5	958440	A	T	0.834605	MDR1 (PF3D7 0523000)	0.4684
Bangladesh vs Ecuador	5	1042561	T	G	0.812388	ACS10 (PF3D7 0525100)	0.2959
Bangladesh vs Ecuador	5	1043303	G	A	0.937225	ACS10 (PF3D7 0525100)	0.2836
Bangladesh vs Ecuador	5	1043474	G	T	0.916433	ACS10 (PF3D7 0525100)	0.488
Bangladesh vs Ecuador	5	1187921	A	G	0.89282	PF3D7 0529000 (PF3D7 0529000)	0.2709
Bangladesh vs Ecuador	5	1188542	T	C	0.964673	PF3D7 0529000 (PF3D7 0529000)	0.4327
Bangladesh vs Ecuador	5	1188659	G	A	0.86888	PF3D7 0529000 (PF3D7 0529000)	0.2608
Bangladesh vs Ecuador	6	237194	T	G	0.810963	PF3D7 0605700 (PF3D7 0605700)	0.3677
Bangladesh vs Ecuador	6	312414	G	C	0.878438	COQ2 (PF3D7 0607500)	0.2499
Bangladesh vs Ecuador	6	378828	G	A	0.823052	PF3D7 0609000 (PF3D7 0609000)	0.2849
Bangladesh vs Ecuador	6	404679	T	A	0.806659	PF3D7 0609500 (PF3D7 0609500)	0.4538
Bangladesh vs Ecuador	6	510595	C	T	0.840991	EIF3L (PF3D7 0612100)	0.3884
Bangladesh vs Ecuador	6	531935	G	A	0.79155	PF3D7 0612900 (PF3D7 0612900)	0.4488
Bangladesh vs Ecuador	6	575829	A	G	0.802321	ApiAP2 (PF3D7 0613800)	0.4066
Bangladesh vs Ecuador	6	578202	A	G	0.820441	ApiAP2 (PF3D7 0613800)	0.259
Bangladesh vs Ecuador	6	825473	G	T	0.767451	PF3D7 0619600 (PF3D7 0619600)	0.4755
Bangladesh vs Ecuador	6	1011446	A	T	0.999201	PF3D7 0624800 (PF3D7 0624800)	0.03298
Bangladesh vs Ecuador	6	1040344	G	A	0.983994	PF3D7 0625600 (PF3D7 0625600)	0.1671
Bangladesh vs Ecuador	6	1110981	A	G	0.9992	PF3D7 0627700 (PF3D7 0627700)	0.4753
Bangladesh vs Ecuador	6	1114587	A	T	0.998385	ACS (PF3D7 0627800)	0.3773
Bangladesh vs Ecuador	6	1114625	A	C	0.993153	ACS (PF3D7 0627800)	0.4544
Bangladesh vs Ecuador	6	1114928	A	G	1	ACS (PF3D7 0627800)	0.4704
Bangladesh vs Ecuador	6	1114951	C	T	0.999193	ACS (PF3D7 0627800)	0.4699
Bangladesh vs Ecuador	6	1116314	T	C	1	ACS (PF3D7 0627800)	0.4624
Bangladesh vs Ecuador	6	1117519	A	G	1	ACS (PF3D7 0627800)	0.456
Bangladesh vs Ecuador	6	1141114	G	A	0.960759	PF3D7 0628100 (PF3D7 0628100)	0.346
Bangladesh vs Ecuador	6	1206227	A	T	0.907385	PL (PF3D7 0629300)	0.3303
Bangladesh vs Ecuador	6	1224777	T	A	0.937027	SET1 (PF3D7 0629700)	0.2436
Bangladesh vs Ecuador	6	1266213	T	A	0.941744	PF3D7 0630300 (PF3D7 0630300)	0.07475
Bangladesh vs Ecuador	6	1266308	A	T	0.892469	PF3D7 0630300 (PF3D7 0630300)	0.1046
Bangladesh vs Ecuador	7	105304	T	C	0.870865	PF3D7 0702500 (PF3D7 0702500)	0.4706
Bangladesh vs Ecuador	7	225194	T	C	0.796631	UT (PF3D7 0704600)	0.2646
Bangladesh vs Ecuador	7	270957	G	A	0.755152	PF3D7 0705500 (PF3D7 0705500)	0.3824
Bangladesh vs Ecuador	7	298978	G	T	0.795456	PF3D7 0706100 (PF3D7 0706100)	0.08247
Bangladesh vs Ecuador	7	383166	C	T	0.911824	HSP90 ()	0.3432
Bangladesh vs Ecuador	7	397135	T	C	0.991563	HSP110c (PF3D7 0708800)	0.06523
Bangladesh vs Ecuador	7	404836	C	G	0.929172	CRT (PF3D7 0709000)	0.4596
Bangladesh vs Ecuador	7	406231	C	T	0.831003	CRT ()	0.4237
Bangladesh vs Ecuador	7	415137	C	T	0.982779	CG2 (PF3D7 0709300)	0.1794
Bangladesh vs Ecuador	7	415245	G	A	0.984782	CG2 (PF3D7 0709300)	0.1559
Bangladesh vs Ecuador	7	415250	T	C	0.98477	CG2 (PF3D7 0709300)	0.1563
Bangladesh vs Ecuador	7	421420	G	A	0.772309	CG2 (PF3D7 0709300)	0.4815
Bangladesh vs Ecuador	7	433519	A	T	0.948089	POP1 (PF3D7 0709600)	0.08528
Bangladesh vs Ecuador	7	433609	A	T	0.943707	POP1 (PF3D7 0709600)	0.119
Bangladesh vs Ecuador	7	451514	T	C	0.764682	PF3D7 0710000 (PF3D7 0710000)	0.367
Bangladesh vs Ecuador	7	455798	G	A	0.860297	PF3D7 0710000 ()	0.3187
Bangladesh vs Ecuador	7	475135	A	G	0.833001	RAD14 (PF3D7 0710400)	0.2358
Bangladesh vs Ecuador	7	602349	G	A	0.962947	RIF ()	0.05541
Bangladesh vs Ecuador	7	622939	G	A	0.893185	PF3D7 0713700 ()	0.0912
Bangladesh vs Ecuador	7	700840	C	T	0.989239	PF3D7 0715900 (PF3D7 0715900)	0.06115
Bangladesh vs Ecuador	7	815129	T	C	0.855416	CRMP2 (PF3D7 0718300)	0.3475
Bangladesh vs Ecuador	7	816733	A	G	0.779734	CRMP2 (PF3D7 0718300)	0.4299
Bangladesh vs Ecuador	7	842326	A	T	0.866054	NEK4 ()	0.2185
Bangladesh vs Ecuador	7	905648	G	A	0.765203	PF3D7 0721000 (PF3D7 0721000)	0.1481
Bangladesh vs Ecuador	7	1196326	A	T	0.875249	PF3D7 0728100 (PF3D7 0728100)	0.2028
Bangladesh vs Ecuador	8	340367	T	G	0.780148	PF3D7 0806300 (PF3D7 0806300)	0.06227
Bangladesh vs Ecuador	8	489611	A	T	0.889644	PF3D7 0809600 (PF3D7 0809600)	0.2728
Bangladesh vs Ecuador	8	546841	T	A	0.806996	PF3D7 0810700 (PF3D7 0810700)	0.3744
Bangladesh vs Ecuador	8	580045	G	A	0.812392	CARM1 (PF3D7 0811500)	0.09367
Bangladesh vs Ecuador	8	1383582	T	C	0.843223	PF3D7 0832000 (PF3D7 0832000)	0.2451
Bangladesh vs Ecuador	9	127644	G	A	0.802421	PF3D7 0902900 (PF3D7 0902900)	0.3612
Bangladesh vs Ecuador	9	492627	C	T	0.885646	ALP5a (PF3D7 0910700)	0.3887
Bangladesh vs Ecuador	9	516978	G	A	0.860967	CRMP1 (PF3D7 0911300)	0.4444
Bangladesh vs Ecuador	9	603629	T	C	0.762854	PF3D7 0914100 (PF3D7 0914100)	0.4812
Bangladesh vs Ecuador	9	1015339	T	C	0.826638	PF3D7 0925100 (PF3D7 0925100)	0.254
Bangladesh vs Ecuador	9	1078816	T	A	0.803593	PF3D7 0926500 (PF3D7 0926500)	0.493
Bangladesh vs Ecuador	9	1084846	A	C	0.903498	PF3D7 0926600 (PF3D7 0926600)	0.23
Bangladesh vs Ecuador	9	1179228	G	A	0.931242	RhopH2 (PF3D7 0929400)	0.374
Bangladesh vs Ecuador	10	444064	A	G	0.876849	PF3D7 1011500 (PF3D7 1011500)	0.3266
Bangladesh vs Ecuador	10	558456	C	A	0.901488	PF3D7 1014100 (PF3D7 1014100)	0.2466
Bangladesh vs Ecuador	10	662320	T	C	0.957285	PF3D7 1016500 (PF3D7 1016500)	0.3245
Bangladesh vs Ecuador	10	862077	G	C	0.915768	PF3D7 1021300 (PF3D7 1021300)	0.3556
Bangladesh vs Ecuador	10	1111441	T	C	0.777411	CDC20 (PF3D7 1026400)	0.362
Bangladesh vs Ecuador	10	1394950	G	A	0.751138	PF3D7 1035200 (PF3D7 1035200)	0.2483
Bangladesh vs Ecuador	10	1449646	G	A	0.928942	PF3D7 1036800 (PF3D7 1036800)	0.1156
Bangladesh vs Ecuador	11	466252	T	A	0.907676	PF3D7 1112100 (PF3D7 1112100)	0.1948
Bangladesh vs Ecuador	11	638299	T	G	0.951229	HSP101 (PF3D7 1116800)	0.4931
Bangladesh vs Ecuador	11	648265	G	T	0.750433	PF3D7 1117000 (PF3D7 1117000)	0.038
Bangladesh vs Ecuador	11	1038075	C	T	0.755281	PF3D7 1126600 (PF3D7 1126600)	0.3594
Bangladesh vs Ecuador	11	1243999	T	C	0.761468	PF3D7 1132100 (PF3D7 1132100)	0.465
Bangladesh vs Ecuador	11	1275658	T	A	0.763196	PF3D7 1133000 (PF3D7 1133000)	0.2924
Bangladesh vs Ecuador	11	1640555	T	C	0.763484	PF3D7 1140900 (PF3D7 1140900)	0.3559
Bangladesh vs Ecuador	12	95417	T	A	0.770932	PF3D7 1201400 (PF3D7 1201400)	0.3774
Bangladesh vs Ecuador	12	476635	G	C	0.772309	PF3D7 1210700 (PF3D7 1210700)	0.4509
Bangladesh vs Ecuador	12	550805	T	C	0.868815	PF3D7 1212400 (PF3D7 1212400)	0.1371
Bangladesh vs Ecuador	12	642179	T	C	0.822529	SR10 (PF3D7 1215900)	0.04208
Bangladesh vs Ecuador	12	659788	G	A	0.906845	CelTOS (PF3D7 1216600)	0.3674
Bangladesh vs Ecuador	12	1162825	A	C	0.838116	MSP9 (PF3D7 1228600)	0.4934
Bangladesh vs Ecuador	12	1184925	A	G	0.82255	PF3D7 1228900 (PF3D7 1228900)	0.317
Bangladesh vs Ecuador	12	1542404	C	A	0.863411	PF3D7 1237100 (PF3D7 1237100)	0.05956
Bangladesh vs Ecuador	12	1552084	T	C	0.86391	PF3D7 1237200 (PF3D7 1237200)	0.07051
Bangladesh vs Ecuador	12	1559859	T	A	0.797761	PF3D7 1237400 (PF3D7 1237400)	0.1621
Bangladesh vs Ecuador	13	92637	T	C	0.76945	EBA140 (PF3D7 1301600)	0.3686
Bangladesh vs Ecuador	13	161003	T	G	0.754938	VAMP8 ()	0.2761
Bangladesh vs Ecuador	13	315647	T	C	0.789511	PF3D7 1306600 (PF3D7 1306600)	0.3308
Bangladesh vs Ecuador	13	444696	C	A	0.904331	VPS18 (PF3D7 1309700)	0.1342
Bangladesh vs Ecuador	13	512590	A	G	0.753091	MCAT (PF3D7 1312000)	0.341
Bangladesh vs Ecuador	13	738765	A	T	0.888723	PF3D7 1317700 (PF3D7 1317700)	0.06471
Bangladesh vs Ecuador	13	743560	C	T	0.848944	PF3D7 1317900 (PF3D7 1317900)	0.29
Bangladesh vs Ecuador	13	872241	G	A	0.931561	PF3D7 1321100 (PF3D7 1321100)	0.4408
Bangladesh vs Ecuador	13	944480	G	C	0.876137	PF3D7 1322300 (PF3D7 1322300)	0.3185
Bangladesh vs Ecuador	13	1257063	A	G	0.812126	PF3D7 1329500 (PF3D7 1329500)	0.4165
Bangladesh vs Ecuador	13	1466351	G	A	0.808912	TRAP (PF3D7 1335900)	0.3763
Bangladesh vs Ecuador	13	1697887	T	C	0.816367	PMT (PF3D7 1343000)	0.4451
Bangladesh vs Ecuador	13	1766359	C	G	0.822729	PF3D7 1344100 (PF3D7 1344100)	0.4407
Bangladesh vs Ecuador	13	2257919	C	A	0.997576	ARK3 (PF3D7 1356800)	0.0677
Bangladesh vs Ecuador	13	2342841	A	T	0.795884	PF3D7 1359000 (PF3D7 1359000)	0.3689
Bangladesh vs Ecuador	13	2408374	C	T	0.863901	EMC3 (PF3D7 1360200)	0.07644
Bangladesh vs Ecuador	13	2422766	A	G	0.902	GCbeta (PF3D7 1360500)	0.1615
Bangladesh vs Ecuador	13	2435370	A	T	0.936205	FLN (PF3D7 1360800)	0.4409
Bangladesh vs Ecuador	13	2479113	C	G	0.887999	PF3D7 1361800 (PF3D7 1361800)	0.3359
Bangladesh vs Ecuador	13	2481108	C	G	0.980761	PF3D7 1361800 (PF3D7 1361800)	0.3507
Bangladesh vs Ecuador	13	2569646	A	C	0.790946	P92 (PF3D7 1364100)	0.2341
Bangladesh vs Ecuador	14	420628	A	G	0.927643	RAP1 (PF3D7 1410400)	0.1839
Bangladesh vs Ecuador	14	448939	T	C	0.78238	PF3D7 1411100 (PF3D7 1411100)	0.3448
Bangladesh vs Ecuador	14	683666	G	A	0.755902	PF3D7 1416800 (PF3D7 1416800)	0.4109
Bangladesh vs Ecuador	14	911819	G	C	0.768321	PF3D7 1422600 (PF3D7 1422600)	0.3623
Bangladesh vs Ecuador	14	922960	A	G	0.835261	PF3D7 1422900 (PF3D7 1422900)	0.497
Bangladesh vs Ecuador	14	923269	C	A	0.77476	PF3D7 1422900 (PF3D7 1422900)	0.0663
Bangladesh vs Ecuador	14	1542768	C	A	0.852203	SEC62 ()	0.4039
Bangladesh vs Ecuador	14	1562642	T	A	0.815674	PF3D7 1438600 (PF3D7 1438600)	0.4934
Bangladesh vs Ecuador	14	1665655	G	T	0.970905	PF3D7 1440800 (PF3D7 1440800)	0.2395
Bangladesh vs Ecuador	14	1666117	T	C	0.912714	PF3D7 1440800 (PF3D7 1440800)	0.3647
Bangladesh vs Ecuador	14	1912280	G	A	0.870333	PF3D7 1446500 (PF3D7 1446500)	0.3396
Bangladesh vs Ecuador	14	1993471	T	C	0.881038	PF3D7 1448500 (PF3D7 1448500)	0.4155
Bangladesh vs Ecuador	14	2060776	G	A	0.761658	PF3D7 1450400 (PF3D7 1450400)	0.4208
Bangladesh vs Ecuador	14	2185421	G	T	0.845262	PF3D7 1453200 (PF3D7 1453200)	0.3849
Bangladesh vs Ecuador	14	2364543	A	T	0.83134	PF3D7 1457600 (PF3D7 1457600)	0.4767
Bangladesh vs Ecuador	14	2755887	T	A	0.810205	PF3D7 1467500 (PF3D7 1467500)	0.3293
Bangladesh vs Ecuador	14	2792758	G	T	0.907136	PF3D7 1468100 (PF3D7 1468100)	0.2371
Bangladesh vs Eritrea	2	109634	G	C	0.811475	LSAP2 (PF3D7 0202100)	0.3728
Bangladesh vs Eritrea	3	670134	G	C	0.850177	FNT (PF3D7 0316600)	0.2906
Bangladesh vs Eritrea	3	851156	C	T	0.976	Cap380 (PF3D7 0320400)	0.4239
Bangladesh vs Eritrea	3	897781	T	A	0.843551	PF3D7 0321500 (PF3D7 0321500)	0.1468
Bangladesh vs Eritrea	5	561510	G	A	0.858325	PF3D7 0513200 (PF3D7 0513200)	0.234
Bangladesh vs Eritrea	5	958440	A	T	0.834605	MDR1 (PF3D7 0523000)	0.4684
Bangladesh vs Eritrea	5	1042561	T	G	0.958882	ACS10 (PF3D7 0525100)	0.2959
Bangladesh vs Eritrea	5	1043474	G	T	0.916433	ACS10 (PF3D7 0525100)	0.488
Bangladesh vs Eritrea	5	1188542	T	C	0.862918	PF3D7 0529000 (PF3D7 0529000)	0.4327
Bangladesh vs Eritrea	7	76867	A	G	0.77466	RIF ()	0.227
Bangladesh vs Eritrea	7	76869	A	G	0.775072	RIF ()	0.227
Bangladesh vs Eritrea	8	812667	G	A	0.788732	RON5 (PF3D7 0817700)	0.4691
Bangladesh vs Eritrea	8	1201455	C	T	0.869844	SET3 (PF3D7 0827800)	0.3026
Bangladesh vs Eritrea	8	1383582	T	C	0.843223	PF3D7 0832000 (PF3D7 0832000)	0.2451
Bangladesh vs Eritrea	8	1383603	C	A	0.878034	PF3D7 0832000 (PF3D7 0832000)	0.2049
Bangladesh vs Eritrea	9	1015339	T	C	0.843203	PF3D7 0925100 (PF3D7 0925100)	0.254
Bangladesh vs Eritrea	9	1179228	G	A	0.931242	RhopH2 (PF3D7 0929400)	0.374
Bangladesh vs Eritrea	11	638299	T	G	0.847017	HSP101 (PF3D7 1116800)	0.4931
Bangladesh vs Eritrea	11	1594572	G	A	0.761435	PF3D7 1139900 ()	0.4756
Bangladesh vs Eritrea	12	150730	T	C	0.79738	PF3D7 1202600 (PF3D7 1202600)	0.3043
Bangladesh vs Eritrea	12	659788	G	A	0.906845	CelTOS (PF3D7 1216600)	0.3674
Bangladesh vs Eritrea	13	512590	A	G	0.753091	MCAT (PF3D7 1312000)	0.341
Bangladesh vs Eritrea	13	576501	C	T	0.785857	PF3D7 1313500 (PF3D7 1313500)	0.4732
Bangladesh vs Eritrea	13	852849	C	A	0.820894	PF3D7 1320700 (PF3D7 1320700)	0.3475
Bangladesh vs Eritrea	13	876934	C	T	0.783192	PF3D7 1321300 (PF3D7 1321300)	0.2484
Bangladesh vs Eritrea	13	1879453	T	A	0.868516	P47 (PF3D7 1346800)	0.3506
Bangladesh vs Eritrea	13	1879488	G	A	0.865594	P47 (PF3D7 1346800)	0.4924
Bangladesh vs Eritrea	13	2824570	G	A	0.805833	PF3D7 1371800 (PF3D7 1371800)	0.318
Bangladesh vs Eritrea	14	439454	T	C	0.775813	PF3D7 1410900 (PF3D7 1410900)	0.2702
Bangladesh vs Eritrea	14	922960	A	G	0.777953	PF3D7 1422900 (PF3D7 1422900)	0.497
Bangladesh vs Eritrea	14	1106139	C	T	0.792182	PF3D7 1428300 (PF3D7 1428300)	0.3685
Bangladesh vs Eritrea	14	1814686	T	C	0.765433	PF3D7 1444100 (PF3D7 1444100)	0.3659
Bangladesh vs Eritrea	14	2536485	A	G	0.784673	PF3D7 1462400 (PF3D7 1462400)	0.3323
Bangladesh vs Eritrea	14	2695875	T	C	0.756942	PF3D7 1466200 (PF3D7 1466200)	0.4575
Bangladesh vs Eritrea	14	2733656	C	T	0.765805	PF3D7 1466800 (PF3D7 1466800)	0.4186
Bangladesh vs Ethiopia	3	851156	C	T	0.976	Cap380 (PF3D7 0320400)	0.4239
Bangladesh vs Ethiopia	4	329468	A	T	0.783931	Pfs16 (PF3D7 0406200)	0.4913
Bangladesh vs Ethiopia	5	706173	T	A	0.785957	ApiAP2 (PF3D7 0516800)	0.1881
Bangladesh vs Ethiopia	5	958440	A	T	0.834605	MDR1 (PF3D7 0523000)	0.4684
Bangladesh vs Ethiopia	5	1043474	G	T	0.859668	ACS10 (PF3D7 0525100)	0.488
Bangladesh vs Ethiopia	5	1188542	T	C	0.756196	PF3D7 0529000 (PF3D7 0529000)	0.4327
Bangladesh vs Ethiopia	8	812667	G	A	0.788732	RON5 (PF3D7 0817700)	0.4691
Bangladesh vs Ethiopia	9	203959	C	T	0.772953	PF3D7 0904300 (PF3D7 0904300)	0.263
Bangladesh vs Ethiopia	9	603629	T	C	0.762854	PF3D7 0914100 (PF3D7 0914100)	0.4812
Bangladesh vs Ethiopia	9	949454	G	A	0.84061	PLP3 (PF3D7 0923300)	0.0649
Bangladesh vs Ethiopia	9	1179228	G	A	0.931242	RhopH2 (PF3D7 0929400)	0.374
Bangladesh vs Ethiopia	10	817457	C	T	0.791068	PF3D7 1020200 (PF3D7 1020200)	0.2634
Bangladesh vs Ethiopia	11	638299	T	G	0.951229	HSP101 (PF3D7 1116800)	0.4931
Bangladesh vs Ethiopia	13	512590	A	G	0.753091	MCAT (PF3D7 1312000)	0.341
Bangladesh vs Ethiopia	13	876934	C	T	0.765067	PF3D7 1321300 (PF3D7 1321300)	0.2484
Bangladesh vs Ethiopia	13	1879453	T	A	0.868516	P47 (PF3D7 1346800)	0.3506
Bangladesh vs Ethiopia	13	1879488	G	A	0.865594	P47 (PF3D7 1346800)	0.4924
Bangladesh vs Ethiopia	14	448939	T	C	0.906661	PF3D7 1411100 (PF3D7 1411100)	0.3448
Bangladesh vs Ethiopia	14	2260828	C	A	0.828923	PF3D7 1455300 (PF3D7 1455300)	0.1524
Bangladesh vs Ethiopia	14	2536485	A	G	0.777669	PF3D7 1462400 (PF3D7 1462400)	0.3323
Bangladesh vs Ethiopia	14	2695875	T	C	0.756942	PF3D7 1466200 (PF3D7 1466200)	0.4575
Bangladesh vs French Guiana	2	166372	T	C	0.808444	PF3D7 0203600 (PF3D7 0203600)	0.4179
Bangladesh vs French Guiana	2	614624	C	T	0.890307	RON6 ()	0.3229
Bangladesh vs French Guiana	3	510000	G	T	0.892786	PF3D7 0311900 (PF3D7 0311900)	0.3991
Bangladesh vs French Guiana	3	751699	T	A	0.792861	RPB1 (PF3D7 0318200)	0.4745
Bangladesh vs French Guiana	3	849476	C	T	0.903242	Cap380 (PF3D7 0320400)	0.2944
Bangladesh vs French Guiana	3	851156	C	T	0.797268	Cap380 (PF3D7 0320400)	0.4239
Bangladesh vs French Guiana	4	329468	A	T	0.945665	Pfs16 (PF3D7 0406200)	0.4913
Bangladesh vs French Guiana	4	677644	A	G	0.848508	PF3D7 0415200 (PF3D7 0415200)	0.115
Bangladesh vs French Guiana	4	683888	G	A	0.889201	CRK3 (PF3D7 0415300)	0.1523
Bangladesh vs French Guiana	4	691961	C	T	0.871263	PF3D7 0415700 (PF3D7 0415700)	0.2948
Bangladesh vs French Guiana	4	748262	T	C	0.971657	DHFR-TS (PF3D7 0417200)	0.1808
Bangladesh vs French Guiana	4	757119	A	G	0.880734	PF3D7 0417400 (PF3D7 0417400)	0.3289
Bangladesh vs French Guiana	4	767099	T	G	0.796407	PF3D7 0417400 (PF3D7 0417400)	0.4823
Bangladesh vs French Guiana	4	797761	A	C	0.849741	PF3D7 0418000 (PF3D7 0418000)	0.2948
Bangladesh vs French Guiana	4	839310	A	G	0.949016	PF3D7 0418600 (PF3D7 0418600)	0.2204
Bangladesh vs French Guiana	4	863561	C	T	0.772928	PF3D7 0419400 (PF3D7 0419400)	0.4831
Bangladesh vs French Guiana	4	1121457	C	G	0.889497	FIKK4.2 (PF3D7 0424700)	0.1356
Bangladesh vs French Guiana	4	1121472	T	A	0.890455	FIKK4.2 (PF3D7 0424700)	0.1255
Bangladesh vs French Guiana	4	1122147	A	C	0.889434	FIKK4.2 (PF3D7 0424700)	0.1593
Bangladesh vs French Guiana	5	396039	T	C	0.826193	RNAPI (PF3D7 0509400)	0.2596
Bangladesh vs French Guiana	5	643899	A	G	0.785361	PF3D7 0515500 (PF3D7 0515500)	0.4356
Bangladesh vs French Guiana	5	679125	C	T	0.817127	PF3D7 0516300 (PF3D7 0516300)	0.3105
Bangladesh vs French Guiana	5	908826	G	A	0.85697	PF3D7 0522400 (PF3D7 0522400)	0.2865
Bangladesh vs French Guiana	5	929884	A	G	0.856394	PF3D7 0522400 (PF3D7 0522400)	0.2951
Bangladesh vs French Guiana	5	930435	C	T	0.809543	PF3D7 0522400 (PF3D7 0522400)	0.4172
Bangladesh vs French Guiana	5	949158	A	G	0.948503	PF3D7 0522900 (PF3D7 0522900)	0.2287
Bangladesh vs French Guiana	5	958440	A	T	0.834605	MDR1 (PF3D7 0523000)	0.4684
Bangladesh vs French Guiana	5	966314	C	A	0.937063	PF3D7 0523200 (PF3D7 0523200)	0.163
Bangladesh vs French Guiana	5	1042561	T	G	0.958882	ACS10 (PF3D7 0525100)	0.2959
Bangladesh vs French Guiana	5	1043303	G	A	0.937225	ACS10 (PF3D7 0525100)	0.2836
Bangladesh vs French Guiana	5	1043474	G	T	0.916433	ACS10 (PF3D7 0525100)	0.488
Bangladesh vs French Guiana	5	1185083	G	A	0.791375	PF3D7 0528900 ()	0.3887
Bangladesh vs French Guiana	5	1188542	T	C	0.964673	PF3D7 0529000 (PF3D7 0529000)	0.4327
Bangladesh vs French Guiana	6	389754	A	G	0.847505	PF3D7 0609100 (PF3D7 0609100)	0.4064
Bangladesh vs French Guiana	6	482969	G	A	0.996788	PF3D7 0611500 (PF3D7 0611500)	0.1406
Bangladesh vs French Guiana	6	528066	T	A	0.825289	P12p (PF3D7 0612800)	0.3696
Bangladesh vs French Guiana	6	627141	T	G	0.904268	PF3D7 0615200 (PF3D7 0615200)	0.295
Bangladesh vs French Guiana	6	825473	G	T	0.767451	PF3D7 0619600 (PF3D7 0619600)	0.4755
Bangladesh vs French Guiana	6	834400	G	A	0.783123	PF3D7 0619800 (PF3D7 0619800)	0.4618
Bangladesh vs French Guiana	6	834448	T	A	0.836874	PF3D7 0619800 (PF3D7 0619800)	0.463
Bangladesh vs French Guiana	6	851736	C	T	0.850979	MSP10 (PF3D7 0620400)	0.4696
Bangladesh vs French Guiana	6	1110981	A	G	0.9992	PF3D7 0627700 (PF3D7 0627700)	0.4753
Bangladesh vs French Guiana	6	1111541	C	T	0.999598	PF3D7 0627700 (PF3D7 0627700)	0.3828
Bangladesh vs French Guiana	6	1114625	A	C	0.993153	ACS (PF3D7 0627800)	0.4544
Bangladesh vs French Guiana	6	1114928	A	G	1	ACS (PF3D7 0627800)	0.4704
Bangladesh vs French Guiana	6	1114951	C	T	0.999193	ACS (PF3D7 0627800)	0.4699
Bangladesh vs French Guiana	6	1116314	T	C	1	ACS (PF3D7 0627800)	0.4624
Bangladesh vs French Guiana	6	1117519	A	G	1	ACS (PF3D7 0627800)	0.456
Bangladesh vs French Guiana	6	1206227	A	T	0.907385	PL (PF3D7 0629300)	0.3303
Bangladesh vs French Guiana	6	1224777	T	A	0.937027	SET1 (PF3D7 0629700)	0.2436
Bangladesh vs French Guiana	7	270957	G	A	0.905882	PF3D7 0705500 (PF3D7 0705500)	0.3824
Bangladesh vs French Guiana	7	375339	A	G	0.812526	PF3D7 0708200 (PF3D7 0708200)	0.3444
Bangladesh vs French Guiana	7	378669	G	A	0.911049	BUD32 (PF3D7 0708300)	0.2633
Bangladesh vs French Guiana	7	383166	C	T	0.911824	HSP90 ()	0.3432
Bangladesh vs French Guiana	7	383527	T	C	0.991111	HSP90 ()	0.1849
Bangladesh vs French Guiana	7	403337	G	T	0.951981	CRT ()	0.3022
Bangladesh vs French Guiana	7	404836	C	G	0.929172	CRT (PF3D7 0709000)	0.4596
Bangladesh vs French Guiana	7	419410	G	A	0.766975	CG2 (PF3D7 0709300)	0.3449
Bangladesh vs French Guiana	7	419413	A	G	0.76676	CG2 (PF3D7 0709300)	0.3458
Bangladesh vs French Guiana	7	419603	T	A	0.793352	CG2 (PF3D7 0709300)	0.299
Bangladesh vs French Guiana	7	421420	G	A	0.772309	CG2 (PF3D7 0709300)	0.4815
Bangladesh vs French Guiana	7	451514	T	C	0.764682	PF3D7 0710000 (PF3D7 0710000)	0.367
Bangladesh vs French Guiana	7	451640	T	G	0.818907	PF3D7 0710000 (PF3D7 0710000)	0.2668
Bangladesh vs French Guiana	7	455798	G	A	0.860297	PF3D7 0710000 ()	0.3187
Bangladesh vs French Guiana	7	466431	A	T	0.804499	PF3D7 0710200 (PF3D7 0710200)	0.4127
Bangladesh vs French Guiana	7	815129	T	C	0.855416	CRMP2 (PF3D7 0718300)	0.3475
Bangladesh vs French Guiana	7	816733	A	G	0.779734	CRMP2 (PF3D7 0718300)	0.4299
Bangladesh vs French Guiana	7	866181	A	G	0.948718	PF3D7 0719900 (PF3D7 0719900)	0.09178
Bangladesh vs French Guiana	8	489611	A	T	0.889644	PF3D7 0809600 (PF3D7 0809600)	0.2728
Bangladesh vs French Guiana	8	492502	T	A	0.75829	PF3D7 0809600 (PF3D7 0809600)	0.2773
Bangladesh vs French Guiana	8	505739	A	G	0.787963	PF3D7 0809800 (PF3D7 0809800)	0.2991
Bangladesh vs French Guiana	8	546841	T	A	0.806996	PF3D7 0810700 (PF3D7 0810700)	0.3744
Bangladesh vs French Guiana	8	619138	A	G	0.808109	SSP3 (PF3D7 0812300)	0.454
Bangladesh vs French Guiana	8	991389	G	T	0.822302	PF3D7 0822400 (PF3D7 0822400)	0.4443
Bangladesh vs French Guiana	8	1167885	C	T	0.761583	DBP10 (PF3D7 0827000)	0.2631
Bangladesh vs French Guiana	9	231065	C	A	0.830258	CuTP (PF3D7 0904900)	0.2482
Bangladesh vs French Guiana	9	283868	A	G	0.75489	WDR66 (PF3D7 0905600)	0.4969
Bangladesh vs French Guiana	9	492627	C	T	0.885646	ALP5a (PF3D7 0910700)	0.3887
Bangladesh vs French Guiana	9	516978	G	A	0.860967	CRMP1 (PF3D7 0911300)	0.4444
Bangladesh vs French Guiana	9	828981	A	G	0.846203	PF3D7 0920200 (PF3D7 0920200)	0.1593
Bangladesh vs French Guiana	9	1015339	T	C	0.776971	PF3D7 0925100 (PF3D7 0925100)	0.254
Bangladesh vs French Guiana	9	1078816	T	A	0.803593	PF3D7 0926500 (PF3D7 0926500)	0.493
Bangladesh vs French Guiana	9	1084846	A	C	0.903498	PF3D7 0926600 (PF3D7 0926600)	0.23
Bangladesh vs French Guiana	9	1179228	G	A	0.875882	RhopH2 (PF3D7 0929400)	0.374
Bangladesh vs French Guiana	10	444064	A	G	0.876849	PF3D7 1011500 (PF3D7 1011500)	0.3266
Bangladesh vs French Guiana	10	605295	T	A	0.802732	PF3D7 1014900 (PF3D7 1014900)	0.4687
Bangladesh vs French Guiana	10	662320	T	C	0.895356	PF3D7 1016500 (PF3D7 1016500)	0.3245
Bangladesh vs French Guiana	10	817457	C	T	0.787876	PF3D7 1020200 (PF3D7 1020200)	0.2634
Bangladesh vs French Guiana	10	862077	G	C	0.915768	PF3D7 1021300 (PF3D7 1021300)	0.3556
Bangladesh vs French Guiana	10	1111441	T	C	0.865839	CDC20 (PF3D7 1026400)	0.362
Bangladesh vs French Guiana	11	307361	G	A	0.982065	PAIP1 (PF3D7 1107300)	0.1506
Bangladesh vs French Guiana	11	565295	G	A	0.880489	PF3D7 1114900 (PF3D7 1114900)	0.3378
Bangladesh vs French Guiana	11	1006784	T	C	0.867335	PF3D7 1125700 (PF3D7 1125700)	0.4857
Bangladesh vs French Guiana	12	95417	T	A	0.827753	PF3D7 1201400 (PF3D7 1201400)	0.3774
Bangladesh vs French Guiana	12	836994	T	C	0.908102	SET10 (PF3D7 1221000)	0.3953
Bangladesh vs French Guiana	12	1162825	A	C	0.882847	MSP9 (PF3D7 1228600)	0.4934
Bangladesh vs French Guiana	13	445694	C	T	0.920895	PF3D7 1309800 (PF3D7 1309800)	0.2115
Bangladesh vs French Guiana	13	1466351	G	A	0.808912	TRAP (PF3D7 1335900)	0.3763
Bangladesh vs French Guiana	13	1482708	C	T	0.766294	PF3D7 1336700 (PF3D7 1336700)	0.3058
Bangladesh vs French Guiana	13	1858907	C	T	0.871458	PF3D7 1346400 (PF3D7 1346400)	0.4592
Bangladesh vs French Guiana	13	2070556	T	G	0.78483	PF3D7 1352000 (PF3D7 1352000)	0.3288
Bangladesh vs French Guiana	13	2179835	G	C	0.972876	PF3D7 1354700 (PF3D7 1354700)	0.3946
Bangladesh vs French Guiana	13	2342841	A	T	0.879566	PF3D7 1359000 (PF3D7 1359000)	0.3689
Bangladesh vs French Guiana	13	2422766	A	G	0.980392	GCbeta (PF3D7 1360500)	0.1615
Bangladesh vs French Guiana	13	2479113	C	G	0.972317	PF3D7 1361800 (PF3D7 1361800)	0.3359
Bangladesh vs French Guiana	13	2824624	C	T	0.775104	PF3D7 1371800 (PF3D7 1371800)	0.2665
Bangladesh vs French Guiana	14	41328	A	T	0.890657	PF3D7 1401100 (PF3D7 1401100)	0.1218
Bangladesh vs French Guiana	14	420628	A	G	0.995979	RAP1 (PF3D7 1410400)	0.1839
Bangladesh vs French Guiana	14	911819	G	C	0.855142	PF3D7 1422600 (PF3D7 1422600)	0.3623
Bangladesh vs French Guiana	14	922960	A	G	0.835261	PF3D7 1422900 (PF3D7 1422900)	0.497
Bangladesh vs French Guiana	14	1226565	T	G	0.781551	PF3D7 1431200 (PF3D7 1431200)	0.3349
Bangladesh vs French Guiana	14	1307328	A	G	0.81387	PF3D7 1433200 (PF3D7 1433200)	0.2984
Bangladesh vs French Guiana	14	1562642	T	A	0.815674	PF3D7 1438600 (PF3D7 1438600)	0.4934
Bangladesh vs French Guiana	14	1665655	G	T	0.970905	PF3D7 1440800 (PF3D7 1440800)	0.2395
Bangladesh vs French Guiana	14	1666117	T	C	0.912714	PF3D7 1440800 (PF3D7 1440800)	0.3647
Bangladesh vs French Guiana	14	1710253	A	T	0.845833	PF3D7 1442200 (PF3D7 1442200)	0.1109
Bangladesh vs French Guiana	14	2733656	C	T	0.873727	PF3D7 1466800 (PF3D7 1466800)	0.4186
Bangladesh vs French Guiana	14	3017880	T	C	0.767927	PF3D7 1474000 (PF3D7 1474000)	0.1069
Bangladesh vs Gabon	3	622763	G	C	0.877695	CTRP (PF3D7 0315200)	0.4009
Bangladesh vs Gabon	3	851156	C	T	0.818436	Cap380 (PF3D7 0320400)	0.4239
Bangladesh vs Gabon	4	329468	A	T	0.818363	Pfs16 (PF3D7 0406200)	0.4913
Bangladesh vs Gabon	6	1110981	A	G	0.866245	PF3D7 0627700 (PF3D7 0627700)	0.4753
Bangladesh vs Gabon	6	1111541	C	T	0.804752	PF3D7 0627700 (PF3D7 0627700)	0.3828
Bangladesh vs Gabon	6	1114587	A	T	0.900727	ACS (PF3D7 0627800)	0.3773
Bangladesh vs Gabon	6	1114625	A	C	0.894484	ACS (PF3D7 0627800)	0.4544
Bangladesh vs Gabon	6	1114928	A	G	0.902655	ACS (PF3D7 0627800)	0.4704
Bangladesh vs Gabon	6	1114951	C	T	0.901692	ACS (PF3D7 0627800)	0.4699
Bangladesh vs Gabon	6	1116314	T	C	0.884956	ACS (PF3D7 0627800)	0.4624
Bangladesh vs Gabon	6	1117519	A	G	0.902655	ACS (PF3D7 0627800)	0.456
Bangladesh vs Gabon	6	1124425	G	C	0.802791	PF3D7 0628100 (PF3D7 0628100)	0.3104
Bangladesh vs Gabon	6	1141114	G	A	0.808257	PF3D7 0628100 (PF3D7 0628100)	0.346
Bangladesh vs Gabon	8	585854	A	C	0.888968	PF3D7 0811600 (PF3D7 0811600)	0.4093
Bangladesh vs Gabon	11	638299	T	G	0.951229	HSP101 (PF3D7 1116800)	0.4931
Bangladesh vs Gabon	13	1879488	G	A	0.865594	P47 (PF3D7 1346800)	0.4924
Bangladesh vs Gabon	14	2364543	A	T	0.774461	PF3D7 1457600 (PF3D7 1457600)	0.4767
Bangladesh vs Guinea	3	622763	G	C	0.859635	CTRP (PF3D7 0315200)	0.4009
Bangladesh vs Guinea	3	851156	C	T	0.822877	Cap380 (PF3D7 0320400)	0.4239
Bangladesh vs Guinea	4	329468	A	T	0.794944	Pfs16 (PF3D7 0406200)	0.4913
Bangladesh vs Guinea	7	105304	T	C	0.837489	PF3D7 0702500 (PF3D7 0702500)	0.4706
Bangladesh vs Guinea	8	585841	C	G	0.883604	PF3D7 0811600 (PF3D7 0811600)	0.4498
Bangladesh vs Guinea	8	585854	A	C	0.938593	PF3D7 0811600 (PF3D7 0811600)	0.4093
Bangladesh vs Guinea	11	638299	T	G	0.936648	HSP101 (PF3D7 1116800)	0.4931
Bangladesh vs Guinea	11	1375988	T	C	0.791348	PPM8 (PF3D7 1135100)	0.4143
Bangladesh vs Guinea	11	1507877	C	T	0.777464	GCalpha (PF3D7 1138400)	0.4567
Bangladesh vs Guinea	12	1162825	A	C	0.776764	MSP9 (PF3D7 1228600)	0.4934
Bangladesh vs Guinea	13	872241	G	A	0.767832	PF3D7 1321100 (PF3D7 1321100)	0.4408
Bangladesh vs Guinea	13	1879488	G	A	0.865594	P47 (PF3D7 1346800)	0.4924
Bangladesh vs Guinea	13	2481108	C	G	0.856591	PF3D7 1361800 (PF3D7 1361800)	0.3507
Bangladesh vs Guyana	2	86870	C	T	0.885786	KAHsp40 (PF3D7 0201800)	0.3324
Bangladesh vs Guyana	2	166372	T	C	0.872459	PF3D7 0203600 (PF3D7 0203600)	0.4179
Bangladesh vs Guyana	2	614624	C	T	0.888884	RON6 ()	0.3229
Bangladesh vs Guyana	3	273124	T	C	0.911469	PF3D7 0305500 (PF3D7 0305500)	0.2185
Bangladesh vs Guyana	3	510000	G	T	0.892786	PF3D7 0311900 (PF3D7 0311900)	0.3991
Bangladesh vs Guyana	3	751699	T	A	0.850497	RPB1 (PF3D7 0318200)	0.4745
Bangladesh vs Guyana	3	849476	C	T	0.979381	Cap380 (PF3D7 0320400)	0.2944
Bangladesh vs Guyana	3	897781	T	A	0.764969	PF3D7 0321500 (PF3D7 0321500)	0.1468
Bangladesh vs Guyana	4	329468	A	T	0.945665	Pfs16 (PF3D7 0406200)	0.4913
Bangladesh vs Guyana	4	677644	A	G	0.985447	PF3D7 0415200 (PF3D7 0415200)	0.115
Bangladesh vs Guyana	4	683888	G	A	0.887178	CRK3 (PF3D7 0415300)	0.1523
Bangladesh vs Guyana	4	691961	C	T	0.869306	PF3D7 0415700 (PF3D7 0415700)	0.2948
Bangladesh vs Guyana	4	748262	T	C	0.971657	DHFR-TS (PF3D7 0417200)	0.1808
Bangladesh vs Guyana	4	757119	A	G	0.880734	PF3D7 0417400 (PF3D7 0417400)	0.3289
Bangladesh vs Guyana	4	767099	T	G	0.796407	PF3D7 0417400 (PF3D7 0417400)	0.4823
Bangladesh vs Guyana	4	797761	A	C	0.849741	PF3D7 0418000 (PF3D7 0418000)	0.2948
Bangladesh vs Guyana	4	839310	A	G	0.949016	PF3D7 0418600 (PF3D7 0418600)	0.2204
Bangladesh vs Guyana	4	863561	C	T	0.772928	PF3D7 0419400 (PF3D7 0419400)	0.4831
Bangladesh vs Guyana	5	382974	T	A	0.751781	PF3D7 0509100 (PF3D7 0509100)	0.4427
Bangladesh vs Guyana	5	396039	T	C	0.851785	RNAPI (PF3D7 0509400)	0.2596
Bangladesh vs Guyana	5	471883	G	A	0.872106	SCD (PF3D7 0511200)	0.2324
Bangladesh vs Guyana	5	561244	G	T	0.807797	PF3D7 0513200 (PF3D7 0513200)	0.2825
Bangladesh vs Guyana	5	643899	A	G	0.90815	PF3D7 0515500 (PF3D7 0515500)	0.4356
Bangladesh vs Guyana	5	679125	C	T	0.816042	PF3D7 0516300 (PF3D7 0516300)	0.3105
Bangladesh vs Guyana	5	908826	G	A	0.855903	PF3D7 0522400 (PF3D7 0522400)	0.2865
Bangladesh vs Guyana	5	929884	A	G	0.856394	PF3D7 0522400 (PF3D7 0522400)	0.2951
Bangladesh vs Guyana	5	930435	C	T	0.80895	PF3D7 0522400 (PF3D7 0522400)	0.4172
Bangladesh vs Guyana	5	949158	A	G	0.948503	PF3D7 0522900 (PF3D7 0522900)	0.2287
Bangladesh vs Guyana	5	958440	A	T	0.831195	MDR1 (PF3D7 0523000)	0.4684
Bangladesh vs Guyana	5	966314	C	A	0.936175	PF3D7 0523200 (PF3D7 0523200)	0.163
Bangladesh vs Guyana	5	1042561	T	G	0.956738	ACS10 (PF3D7 0525100)	0.2959
Bangladesh vs Guyana	5	1043303	G	A	0.937225	ACS10 (PF3D7 0525100)	0.2836
Bangladesh vs Guyana	5	1043474	G	T	0.916433	ACS10 (PF3D7 0525100)	0.488
Bangladesh vs Guyana	5	1188542	T	C	0.964673	PF3D7 0529000 (PF3D7 0529000)	0.4327
Bangladesh vs Guyana	6	377297	A	T	0.782115	PF3D7 0609000 (PF3D7 0609000)	0.2065
Bangladesh vs Guyana	6	389754	A	G	0.847505	PF3D7 0609100 (PF3D7 0609100)	0.4064
Bangladesh vs Guyana	6	482969	G	A	0.93787	PF3D7 0611500 (PF3D7 0611500)	0.1406
Bangladesh vs Guyana	6	528066	T	A	0.825289	P12p (PF3D7 0612800)	0.3696
Bangladesh vs Guyana	6	627141	T	G	0.874659	PF3D7 0615200 (PF3D7 0615200)	0.295
Bangladesh vs Guyana	6	825473	G	T	0.767451	PF3D7 0619600 (PF3D7 0619600)	0.4755
Bangladesh vs Guyana	6	834400	G	A	0.848554	PF3D7 0619800 (PF3D7 0619800)	0.4618
Bangladesh vs Guyana	6	834448	T	A	0.836874	PF3D7 0619800 (PF3D7 0619800)	0.463
Bangladesh vs Guyana	6	851736	C	T	0.850979	MSP10 (PF3D7 0620400)	0.4696
Bangladesh vs Guyana	6	851979	A	G	0.817	MSP10 (PF3D7 0620400)	0.3484
Bangladesh vs Guyana	6	1110981	A	G	0.9992	PF3D7 0627700 (PF3D7 0627700)	0.4753
Bangladesh vs Guyana	6	1111541	C	T	0.999598	PF3D7 0627700 (PF3D7 0627700)	0.3828
Bangladesh vs Guyana	6	1114625	A	C	0.993153	ACS (PF3D7 0627800)	0.4544
Bangladesh vs Guyana	6	1114928	A	G	1	ACS (PF3D7 0627800)	0.4704
Bangladesh vs Guyana	6	1114951	C	T	0.999193	ACS (PF3D7 0627800)	0.4699
Bangladesh vs Guyana	6	1116314	T	C	1	ACS (PF3D7 0627800)	0.4624
Bangladesh vs Guyana	6	1117519	A	G	1	ACS (PF3D7 0627800)	0.456
Bangladesh vs Guyana	6	1206227	A	T	0.907385	PL (PF3D7 0629300)	0.3303
Bangladesh vs Guyana	6	1224777	T	A	0.937027	SET1 (PF3D7 0629700)	0.2436
Bangladesh vs Guyana	7	270957	G	A	0.905882	PF3D7 0705500 (PF3D7 0705500)	0.3824
Bangladesh vs Guyana	7	375339	A	G	0.812526	PF3D7 0708200 (PF3D7 0708200)	0.3444
Bangladesh vs Guyana	7	378669	G	A	0.911049	BUD32 (PF3D7 0708300)	0.2633
Bangladesh vs Guyana	7	383166	C	T	0.911824	HSP90 ()	0.3432
Bangladesh vs Guyana	7	383527	T	C	0.991111	HSP90 ()	0.1849
Bangladesh vs Guyana	7	403337	G	T	0.951981	CRT ()	0.3022
Bangladesh vs Guyana	7	404836	C	G	0.929172	CRT (PF3D7 0709000)	0.4596
Bangladesh vs Guyana	7	419410	G	A	0.766975	CG2 (PF3D7 0709300)	0.3449
Bangladesh vs Guyana	7	419413	A	G	0.76676	CG2 (PF3D7 0709300)	0.3458
Bangladesh vs Guyana	7	419603	T	A	0.793352	CG2 (PF3D7 0709300)	0.299
Bangladesh vs Guyana	7	421420	G	A	0.772309	CG2 (PF3D7 0709300)	0.4815
Bangladesh vs Guyana	7	451514	T	C	0.764682	PF3D7 0710000 (PF3D7 0710000)	0.367
Bangladesh vs Guyana	7	451640	T	G	0.818907	PF3D7 0710000 (PF3D7 0710000)	0.2668
Bangladesh vs Guyana	7	455798	G	A	0.860297	PF3D7 0710000 ()	0.3187
Bangladesh vs Guyana	7	466431	A	T	0.804499	PF3D7 0710200 (PF3D7 0710200)	0.4127
Bangladesh vs Guyana	7	815129	T	C	0.855416	CRMP2 (PF3D7 0718300)	0.3475
Bangladesh vs Guyana	7	816733	A	G	0.779734	CRMP2 (PF3D7 0718300)	0.4299
Bangladesh vs Guyana	7	866181	A	G	0.927303	PF3D7 0719900 (PF3D7 0719900)	0.09178
Bangladesh vs Guyana	7	1362917	T	A	0.803991	EBA175 (PF3D7 0731500)	0.3505
Bangladesh vs Guyana	7	1362925	A	T	0.819576	EBA175 (PF3D7 0731500)	0.3016
Bangladesh vs Guyana	8	489611	A	T	0.889644	PF3D7 0809600 (PF3D7 0809600)	0.2728
Bangladesh vs Guyana	8	492502	T	A	0.75829	PF3D7 0809600 (PF3D7 0809600)	0.2773
Bangladesh vs Guyana	8	505739	A	G	0.771956	PF3D7 0809800 (PF3D7 0809800)	0.2991
Bangladesh vs Guyana	8	546841	T	A	0.806996	PF3D7 0810700 (PF3D7 0810700)	0.3744
Bangladesh vs Guyana	8	619138	A	G	0.808109	SSP3 (PF3D7 0812300)	0.454
Bangladesh vs Guyana	9	231065	C	A	0.889561	CuTP (PF3D7 0904900)	0.2482
Bangladesh vs Guyana	9	283868	A	G	0.75489	WDR66 (PF3D7 0905600)	0.4969
Bangladesh vs Guyana	9	381019	A	G	0.812742	PF3D7 0908200 (PF3D7 0908200)	0.1156
Bangladesh vs Guyana	9	492627	C	T	0.885646	ALP5a (PF3D7 0910700)	0.3887
Bangladesh vs Guyana	9	512326	A	C	0.778297	CRMP1 (PF3D7 0911300)	0.4501
Bangladesh vs Guyana	9	516978	G	A	0.860967	CRMP1 (PF3D7 0911300)	0.4444
Bangladesh vs Guyana	9	828981	A	G	0.810806	PF3D7 0920200 (PF3D7 0920200)	0.1593
Bangladesh vs Guyana	9	1015339	T	C	0.809786	PF3D7 0925100 (PF3D7 0925100)	0.254
Bangladesh vs Guyana	9	1078816	T	A	0.803593	PF3D7 0926500 (PF3D7 0926500)	0.493
Bangladesh vs Guyana	9	1084846	A	C	0.820979	PF3D7 0926600 (PF3D7 0926600)	0.23
Bangladesh vs Guyana	10	444064	A	G	0.876849	PF3D7 1011500 (PF3D7 1011500)	0.3266
Bangladesh vs Guyana	10	605295	T	A	0.802732	PF3D7 1014900 (PF3D7 1014900)	0.4687
Bangladesh vs Guyana	10	662320	T	C	0.957285	PF3D7 1016500 (PF3D7 1016500)	0.3245
Bangladesh vs Guyana	10	817457	C	T	0.853727	PF3D7 1020200 (PF3D7 1020200)	0.2634
Bangladesh vs Guyana	10	862077	G	C	0.906212	PF3D7 1021300 (PF3D7 1021300)	0.3556
Bangladesh vs Guyana	10	1111441	T	C	0.865839	CDC20 (PF3D7 1026400)	0.362
Bangladesh vs Guyana	11	307361	G	A	0.982065	PAIP1 (PF3D7 1107300)	0.1506
Bangladesh vs Guyana	11	565295	G	A	0.909236	PF3D7 1114900 (PF3D7 1114900)	0.3378
Bangladesh vs Guyana	11	1006784	T	C	0.867335	PF3D7 1125700 (PF3D7 1125700)	0.4857
Bangladesh vs Guyana	11	1507877	C	T	0.79461	GCalpha (PF3D7 1138400)	0.4567
Bangladesh vs Guyana	12	95417	T	A	0.827753	PF3D7 1201400 (PF3D7 1201400)	0.3774
Bangladesh vs Guyana	12	836994	T	C	0.908102	SET10 (PF3D7 1221000)	0.3953
Bangladesh vs Guyana	12	1162825	A	C	0.882847	MSP9 (PF3D7 1228600)	0.4934
Bangladesh vs Guyana	12	2151902	T	C	0.82515	PF3D7 1252600 (PF3D7 1252600)	0.4582
Bangladesh vs Guyana	13	366999	G	T	0.941224	cpsSII (PF3D7 1308200)	0.1949
Bangladesh vs Guyana	13	445694	C	T	0.920895	PF3D7 1309800 (PF3D7 1309800)	0.2115
Bangladesh vs Guyana	13	512590	A	G	0.753091	MCAT (PF3D7 1312000)	0.341
Bangladesh vs Guyana	13	1466351	G	A	0.808337	TRAP (PF3D7 1335900)	0.3763
Bangladesh vs Guyana	13	1858907	C	T	0.766531	PF3D7 1346400 (PF3D7 1346400)	0.4592
Bangladesh vs Guyana	13	2070556	T	G	0.78483	PF3D7 1352000 (PF3D7 1352000)	0.3288
Bangladesh vs Guyana	13	2179835	G	C	0.972876	PF3D7 1354700 (PF3D7 1354700)	0.3946
Bangladesh vs Guyana	13	2266147	G	A	0.852477	PF3D7 1357000 (PF3D7 1357000)	0.3082
Bangladesh vs Guyana	13	2266150	C	T	0.850094	PF3D7 1357000 (PF3D7 1357000)	0.3086
Bangladesh vs Guyana	13	2422766	A	G	0.980392	GCbeta (PF3D7 1360500)	0.1615
Bangladesh vs Guyana	13	2479113	C	G	0.972317	PF3D7 1361800 (PF3D7 1361800)	0.3359
Bangladesh vs Guyana	13	2824624	C	T	0.768059	PF3D7 1371800 (PF3D7 1371800)	0.2665
Bangladesh vs Guyana	14	41328	A	T	0.897373	PF3D7 1401100 (PF3D7 1401100)	0.1218
Bangladesh vs Guyana	14	420628	A	G	0.995979	RAP1 (PF3D7 1410400)	0.1839
Bangladesh vs Guyana	14	478047	G	C	0.770534	PF3D7 1411800 (PF3D7 1411800)	0.2412
Bangladesh vs Guyana	14	673692	T	C	0.875082	PF3D7 1416600 (PF3D7 1416600)	0.1089
Bangladesh vs Guyana	14	911819	G	C	0.834128	PF3D7 1422600 (PF3D7 1422600)	0.3623
Bangladesh vs Guyana	14	922960	A	G	0.835261	PF3D7 1422900 (PF3D7 1422900)	0.497
Bangladesh vs Guyana	14	1224877	G	A	0.799362	PF3D7 1431200 (PF3D7 1431200)	0.3105
Bangladesh vs Guyana	14	1226565	T	G	0.830769	PF3D7 1431200 (PF3D7 1431200)	0.3349
Bangladesh vs Guyana	14	1307328	A	G	0.811739	PF3D7 1433200 (PF3D7 1433200)	0.2984
Bangladesh vs Guyana	14	1562642	T	A	0.815674	PF3D7 1438600 (PF3D7 1438600)	0.4934
Bangladesh vs Guyana	14	1665655	G	T	0.970905	PF3D7 1440800 (PF3D7 1440800)	0.2395
Bangladesh vs Guyana	14	1666117	T	C	0.912714	PF3D7 1440800 (PF3D7 1440800)	0.3647
Bangladesh vs Guyana	14	1710253	A	T	0.960394	PF3D7 1442200 (PF3D7 1442200)	0.1109
Bangladesh vs Guyana	14	1748662	G	T	0.766918	PF3D7 1442700 (PF3D7 1442700)	0.4921
Bangladesh vs Guyana	14	1770207	T	C	0.926073	PF3D7 1443100 (PF3D7 1443100)	0.1937
Bangladesh vs Guyana	14	2181371	T	A	0.834421	PF3D7 1453200 (PF3D7 1453200)	0.4524
Bangladesh vs Guyana	14	2733656	C	T	0.873727	PF3D7 1466800 (PF3D7 1466800)	0.4186
Bangladesh vs Guyana	14	3017880	T	C	0.884026	PF3D7 1474000 (PF3D7 1474000)	0.1069
Bangladesh vs Guyana	14	3126183	T	C	0.830749	PF3D7 1475900 (PF3D7 1475900)	0.1439
Bangladesh vs Indonesia	3	751699	T	A	0.821391	RPB1 (PF3D7 0318200)	0.4745
Bangladesh vs Indonesia	4	283484	G	A	0.844586	LISP2 (PF3D7 0405300)	0.4215
Bangladesh vs Indonesia	7	403337	G	T	0.933795	CRT ()	0.3022
Bangladesh vs Indonesia	7	404836	C	G	0.929172	CRT (PF3D7 0709000)	0.4596
Bangladesh vs Indonesia	7	406231	C	T	0.831003	CRT ()	0.4237
Bangladesh vs Indonesia	7	435413	C	T	0.796106	PF3D7 0709700 (PF3D7 0709700)	0.02794
Bangladesh vs Indonesia	7	473404	T	A	0.75948	PF3D7 0710300 ()	0.1673
Bangladesh vs Indonesia	8	546841	T	A	0.806996	PF3D7 0810700 (PF3D7 0810700)	0.3744
Bangladesh vs Indonesia	8	585841	C	G	0.831759	PF3D7 0811600 (PF3D7 0811600)	0.4498
Bangladesh vs Indonesia	8	1002018	T	C	0.82994	PF3D7 0822700 (PF3D7 0822700)	0.2002
Bangladesh vs Indonesia	8	1062754	C	T	0.830519	NT2 (PF3D7 0824400)	0.1371
Bangladesh vs Ivory Coast	3	622763	G	C	0.821879	CTRP (PF3D7 0315200)	0.4009
Bangladesh vs Ivory Coast	3	851156	C	T	0.775465	Cap380 (PF3D7 0320400)	0.4239
Bangladesh vs Ivory Coast	4	329468	A	T	0.827922	Pfs16 (PF3D7 0406200)	0.4913
Bangladesh vs Ivory Coast	4	767099	T	G	0.776506	PF3D7 0417400 (PF3D7 0417400)	0.4823
Bangladesh vs Ivory Coast	5	65071	T	C	0.75195	PIESP2 (PF3D7 0501200)	0.29
Bangladesh vs Ivory Coast	6	1110981	A	G	0.814509	PF3D7 0627700 (PF3D7 0627700)	0.4753
Bangladesh vs Ivory Coast	6	1114928	A	G	0.794326	ACS (PF3D7 0627800)	0.4704
Bangladesh vs Ivory Coast	6	1114951	C	T	0.793189	ACS (PF3D7 0627800)	0.4699
Bangladesh vs Ivory Coast	6	1116314	T	C	0.780142	ACS (PF3D7 0627800)	0.4624
Bangladesh vs Ivory Coast	6	1117519	A	G	0.751773	ACS (PF3D7 0627800)	0.456
Bangladesh vs Ivory Coast	7	105304	T	C	0.870865	PF3D7 0702500 (PF3D7 0702500)	0.4706
Bangladesh vs Ivory Coast	8	585841	C	G	0.874447	PF3D7 0811600 (PF3D7 0811600)	0.4498
Bangladesh vs Ivory Coast	8	585854	A	C	0.922676	PF3D7 0811600 (PF3D7 0811600)	0.4093
Bangladesh vs Ivory Coast	9	1179855	A	C	0.799038	RhopH2 (PF3D7 0929400)	0.3811
Bangladesh vs Ivory Coast	11	638299	T	G	0.951229	HSP101 (PF3D7 1116800)	0.4931
Bangladesh vs Ivory Coast	11	1006784	T	C	0.778089	PF3D7 1125700 (PF3D7 1125700)	0.4857
Bangladesh vs Ivory Coast	11	1375988	T	C	0.838725	PPM8 (PF3D7 1135100)	0.4143
Bangladesh vs Ivory Coast	11	1507877	C	T	0.8457	GCalpha (PF3D7 1138400)	0.4567
Bangladesh vs Ivory Coast	12	1162825	A	C	0.81307	MSP9 (PF3D7 1228600)	0.4934
Bangladesh vs Ivory Coast	13	872241	G	A	0.758093	PF3D7 1321100 (PF3D7 1321100)	0.4408
Bangladesh vs Ivory Coast	13	1879488	G	A	0.865594	P47 (PF3D7 1346800)	0.4924
Bangladesh vs Ivory Coast	13	2124825	T	A	0.783036	PF3D7 1353100 (PF3D7 1353100)	0.28
Bangladesh vs Ivory Coast	13	2435370	A	T	0.79264	FLN (PF3D7 1360800)	0.4409
Bangladesh vs Ivory Coast	13	2479113	C	G	0.755471	PF3D7 1361800 (PF3D7 1361800)	0.3359
Bangladesh vs Ivory Coast	13	2481108	C	G	0.877681	PF3D7 1361800 (PF3D7 1361800)	0.3507
Bangladesh vs Ivory Coast	14	2364543	A	T	0.750143	PF3D7 1457600 (PF3D7 1457600)	0.4767
Bangladesh vs Madagascar	5	1042561	T	G	0.808172	ACS10 (PF3D7 0525100)	0.2959
Bangladesh vs Madagascar	5	1043474	G	T	0.916433	ACS10 (PF3D7 0525100)	0.488
Bangladesh vs Madagascar	5	1188542	T	C	0.865205	PF3D7 0529000 (PF3D7 0529000)	0.4327
Bangladesh vs Madagascar	6	1110981	A	G	0.9992	PF3D7 0627700 (PF3D7 0627700)	0.4753
Bangladesh vs Madagascar	6	1114587	A	T	0.998385	ACS (PF3D7 0627800)	0.3773
Bangladesh vs Madagascar	6	1114625	A	C	0.993153	ACS (PF3D7 0627800)	0.4544
Bangladesh vs Madagascar	6	1114928	A	G	1	ACS (PF3D7 0627800)	0.4704
Bangladesh vs Madagascar	6	1114951	C	T	0.999193	ACS (PF3D7 0627800)	0.4699
Bangladesh vs Madagascar	6	1116314	T	C	1	ACS (PF3D7 0627800)	0.4624
Bangladesh vs Madagascar	6	1117519	A	G	1	ACS (PF3D7 0627800)	0.456
Bangladesh vs Madagascar	6	1124425	G	C	0.805112	PF3D7 0628100 (PF3D7 0628100)	0.3104
Bangladesh vs Madagascar	6	1141114	G	A	0.760569	PF3D7 0628100 (PF3D7 0628100)	0.346
Bangladesh vs Madagascar	6	1206227	A	T	0.852435	PL (PF3D7 0629300)	0.3303
Bangladesh vs Madagascar	7	403625	A	C	0.929341	CRT (PF3D7 0709000)	0.3507
Bangladesh vs Madagascar	7	404407	G	T	0.922622	CRT (PF3D7 0709000)	0.3652
Bangladesh vs Madagascar	7	404836	C	G	0.929172	CRT (PF3D7 0709000)	0.4596
Bangladesh vs Madagascar	8	546841	T	A	0.806996	PF3D7 0810700 (PF3D7 0810700)	0.3744
Bangladesh vs Madagascar	9	850295	T	A	0.795732	PF3D7 0920700 (PF3D7 0920700)	0.337
Bangladesh vs Madagascar	9	1178963	G	A	0.87288	RhopH2 (PF3D7 0929400)	0.2924
Bangladesh vs Madagascar	9	1179228	G	A	0.931242	RhopH2 (PF3D7 0929400)	0.374
Bangladesh vs Madagascar	11	638299	T	G	0.951229	HSP101 (PF3D7 1116800)	0.4931
Bangladesh vs Madagascar	13	1879488	G	A	0.865594	P47 (PF3D7 1346800)	0.4924
Bangladesh vs Madagascar	14	711335	G	A	0.780215	ATG4 (PF3D7 1417300)	0.4891
Bangladesh vs Madagascar	14	2185421	G	T	0.784747	PF3D7 1453200 (PF3D7 1453200)	0.3849
Bangladesh vs Madagascar	14	2364543	A	T	0.815672	PF3D7 1457600 (PF3D7 1457600)	0.4767
Bangladesh vs Malawi	5	1042561	T	G	0.891149	ACS10 (PF3D7 0525100)	0.2959
Bangladesh vs Malawi	5	1043474	G	T	0.887666	ACS10 (PF3D7 0525100)	0.488
Bangladesh vs Malawi	6	1110981	A	G	0.776834	PF3D7 0627700 (PF3D7 0627700)	0.4753
Bangladesh vs Malawi	7	403625	A	C	0.929341	CRT (PF3D7 0709000)	0.3507
Bangladesh vs Malawi	7	404407	G	T	0.922622	CRT (PF3D7 0709000)	0.3652
Bangladesh vs Malawi	7	404836	C	G	0.929172	CRT (PF3D7 0709000)	0.4596
Bangladesh vs Malawi	9	1178963	G	A	0.769854	RhopH2 (PF3D7 0929400)	0.2924
Bangladesh vs Malawi	9	1179228	G	A	0.795603	RhopH2 (PF3D7 0929400)	0.374
Bangladesh vs Malawi	10	1181683	T	C	0.784048	MTRAP (PF3D7 1028700)	0.468
Bangladesh vs Malawi	11	638299	T	G	0.940818	HSP101 (PF3D7 1116800)	0.4931
Bangladesh vs Malawi	13	1879488	G	A	0.865594	P47 (PF3D7 1346800)	0.4924
Bangladesh vs Mauritania	2	319674	G	A	0.779003	SERA2 (PF3D7 0207900)	0.4644
Bangladesh vs Mauritania	3	618447	A	G	0.792842	CTRP (PF3D7 0315200)	0.3291
Bangladesh vs Mauritania	3	622763	G	C	0.824491	CTRP (PF3D7 0315200)	0.4009
Bangladesh vs Mauritania	6	1110981	A	G	0.792166	PF3D7 0627700 (PF3D7 0627700)	0.4753
Bangladesh vs Mauritania	6	1114587	A	T	0.80783	ACS (PF3D7 0627800)	0.3773
Bangladesh vs Mauritania	6	1114625	A	C	0.806288	ACS (PF3D7 0627800)	0.4544
Bangladesh vs Mauritania	6	1114928	A	G	0.832402	ACS (PF3D7 0627800)	0.4704
Bangladesh vs Mauritania	6	1114951	C	T	0.836922	ACS (PF3D7 0627800)	0.4699
Bangladesh vs Mauritania	6	1116314	T	C	0.810056	ACS (PF3D7 0627800)	0.4624
Bangladesh vs Mauritania	6	1117519	A	G	0.782123	ACS (PF3D7 0627800)	0.456
Bangladesh vs Mauritania	7	105304	T	C	0.793887	PF3D7 0702500 (PF3D7 0702500)	0.4706
Bangladesh vs Mauritania	8	585841	C	G	0.878103	PF3D7 0811600 (PF3D7 0811600)	0.4498
Bangladesh vs Mauritania	8	585854	A	C	0.938593	PF3D7 0811600 (PF3D7 0811600)	0.4093
Bangladesh vs Mauritania	11	638299	T	G	0.951229	HSP101 (PF3D7 1116800)	0.4931
Bangladesh vs Mauritania	11	1375988	T	C	0.853204	PPM8 (PF3D7 1135100)	0.4143
Bangladesh vs Mauritania	11	1507877	C	T	0.821522	GCalpha (PF3D7 1138400)	0.4567
Bangladesh vs Mauritania	12	1162825	A	C	0.779936	MSP9 (PF3D7 1228600)	0.4934
Bangladesh vs Mauritania	13	1879488	G	A	0.865594	P47 (PF3D7 1346800)	0.4924
Bangladesh vs Mauritania	13	2481108	C	G	0.913183	PF3D7 1361800 (PF3D7 1361800)	0.3507
Bangladesh vs Mauritania	14	1993471	T	C	0.77784	PF3D7 1448500 (PF3D7 1448500)	0.4155
Bangladesh vs Mozambique	5	1042561	T	G	0.84615	ACS10 (PF3D7 0525100)	0.2959
Bangladesh vs Mozambique	5	1043474	G	T	0.828149	ACS10 (PF3D7 0525100)	0.488
Bangladesh vs Mozambique	7	403625	A	C	0.907719	CRT (PF3D7 0709000)	0.3507
Bangladesh vs Mozambique	7	404407	G	T	0.905568	CRT (PF3D7 0709000)	0.3652
Bangladesh vs Mozambique	7	404836	C	G	0.90188	CRT (PF3D7 0709000)	0.4596
Bangladesh vs Mozambique	9	127644	G	A	0.753667	PF3D7 0902900 (PF3D7 0902900)	0.3612
Bangladesh vs Mozambique	9	1178963	G	A	0.817611	RhopH2 (PF3D7 0929400)	0.2924
Bangladesh vs Mozambique	9	1179228	G	A	0.806374	RhopH2 (PF3D7 0929400)	0.374
Bangladesh vs Mozambique	10	1181683	T	C	0.774739	MTRAP (PF3D7 1028700)	0.468
Bangladesh vs Mozambique	11	638299	T	G	0.951229	HSP101 (PF3D7 1116800)	0.4931
Bangladesh vs Mozambique	13	1879453	T	A	0.794909	P47 (PF3D7 1346800)	0.3506
Bangladesh vs Mozambique	13	1879488	G	A	0.865594	P47 (PF3D7 1346800)	0.4924
Bangladesh vs Mozambique	14	2185421	G	T	0.777351	PF3D7 1453200 (PF3D7 1453200)	0.3849
Bangladesh vs Mozambique	14	2364543	A	T	0.785034	PF3D7 1457600 (PF3D7 1457600)	0.4767
Bangladesh vs Nigeria	2	319674	G	A	0.787421	SERA2 (PF3D7 0207900)	0.4644
Bangladesh vs Nigeria	3	618447	A	G	0.798614	CTRP (PF3D7 0315200)	0.3291
Bangladesh vs Nigeria	3	618708	A	G	0.791107	CTRP (PF3D7 0315200)	0.3053
Bangladesh vs Nigeria	3	622763	G	C	0.878932	CTRP (PF3D7 0315200)	0.4009
Bangladesh vs Nigeria	3	851156	C	T	0.838958	Cap380 (PF3D7 0320400)	0.4239
Bangladesh vs Nigeria	4	329468	A	T	0.830957	Pfs16 (PF3D7 0406200)	0.4913
Bangladesh vs Nigeria	6	1110981	A	G	0.92054	PF3D7 0627700 (PF3D7 0627700)	0.4753
Bangladesh vs Nigeria	6	1111541	C	T	0.776622	PF3D7 0627700 (PF3D7 0627700)	0.3828
Bangladesh vs Nigeria	6	1114587	A	T	0.77668	ACS (PF3D7 0627800)	0.3773
Bangladesh vs Nigeria	6	1114625	A	C	0.810372	ACS (PF3D7 0627800)	0.4544
Bangladesh vs Nigeria	6	1114928	A	G	0.888268	ACS (PF3D7 0627800)	0.4704
Bangladesh vs Nigeria	6	1114951	C	T	0.886017	ACS (PF3D7 0627800)	0.4699
Bangladesh vs Nigeria	6	1116314	T	C	0.899441	ACS (PF3D7 0627800)	0.4624
Bangladesh vs Nigeria	6	1117519	A	G	0.871508	ACS (PF3D7 0627800)	0.456
Bangladesh vs Nigeria	6	1141114	G	A	0.82241	PF3D7 0628100 (PF3D7 0628100)	0.346
Bangladesh vs Nigeria	7	105304	T	C	0.831843	PF3D7 0702500 (PF3D7 0702500)	0.4706
Bangladesh vs Nigeria	8	585841	C	G	0.856583	PF3D7 0811600 (PF3D7 0811600)	0.4498
Bangladesh vs Nigeria	8	585854	A	C	0.919356	PF3D7 0811600 (PF3D7 0811600)	0.4093
Bangladesh vs Nigeria	9	1179855	A	C	0.75999	RhopH2 (PF3D7 0929400)	0.3811
Bangladesh vs Nigeria	11	638299	T	G	0.951229	HSP101 (PF3D7 1116800)	0.4931
Bangladesh vs Nigeria	11	1006784	T	C	0.800658	PF3D7 1125700 (PF3D7 1125700)	0.4857
Bangladesh vs Nigeria	11	1375988	T	C	0.76342	PPM8 (PF3D7 1135100)	0.4143
Bangladesh vs Nigeria	11	1507877	C	T	0.816164	GCalpha (PF3D7 1138400)	0.4567
Bangladesh vs Nigeria	13	852849	C	A	0.765468	PF3D7 1320700 (PF3D7 1320700)	0.3475
Bangladesh vs Nigeria	13	1879488	G	A	0.865594	P47 (PF3D7 1346800)	0.4924
Bangladesh vs Nigeria	13	2481108	C	G	0.940518	PF3D7 1361800 (PF3D7 1361800)	0.3507
Bangladesh vs Senegal	3	622763	G	C	0.851566	CTRP (PF3D7 0315200)	0.4009
Bangladesh vs Senegal	4	329468	A	T	0.86688	Pfs16 (PF3D7 0406200)	0.4913
Bangladesh vs Senegal	8	585841	C	G	0.859486	PF3D7 0811600 (PF3D7 0811600)	0.4498
Bangladesh vs Senegal	8	585854	A	C	0.913548	PF3D7 0811600 (PF3D7 0811600)	0.4093
Bangladesh vs Senegal	11	638299	T	G	0.951229	HSP101 (PF3D7 1116800)	0.4931
Bangladesh vs Senegal	11	1375988	T	C	0.776879	PPM8 (PF3D7 1135100)	0.4143
Bangladesh vs Senegal	11	1507877	C	T	0.750365	GCalpha (PF3D7 1138400)	0.4567
Bangladesh vs Senegal	12	1162825	A	C	0.761307	MSP9 (PF3D7 1228600)	0.4934
Bangladesh vs Senegal	13	872241	G	A	0.838499	PF3D7 1321100 (PF3D7 1321100)	0.4408
Bangladesh vs Senegal	13	1879488	G	A	0.865594	P47 (PF3D7 1346800)	0.4924
Bangladesh vs Senegal	13	2481108	C	G	0.832655	PF3D7 1361800 (PF3D7 1361800)	0.3507
Bangladesh vs Senegal	14	1993471	T	C	0.755751	PF3D7 1448500 (PF3D7 1448500)	0.4155
Bangladesh vs Sudan	3	851156	C	T	0.870079	Cap380 (PF3D7 0320400)	0.4239
Bangladesh vs Sudan	4	329468	A	T	0.867132	Pfs16 (PF3D7 0406200)	0.4913
Bangladesh vs Sudan	5	1042561	T	G	0.857763	ACS10 (PF3D7 0525100)	0.2959
Bangladesh vs Sudan	5	1043474	G	T	0.880293	ACS10 (PF3D7 0525100)	0.488
Bangladesh vs Sudan	9	516978	G	A	0.764035	CRMP1 (PF3D7 0911300)	0.4444
Bangladesh vs Sudan	9	1179228	G	A	0.827129	RhopH2 (PF3D7 0929400)	0.374
Bangladesh vs Sudan	11	638299	T	G	0.91873	HSP101 (PF3D7 1116800)	0.4931
Bangladesh vs Sudan	13	1879453	T	A	0.784752	P47 (PF3D7 1346800)	0.3506
Bangladesh vs Sudan	13	1879488	G	A	0.865594	P47 (PF3D7 1346800)	0.4924
Bangladesh vs Uganda	3	618447	A	G	0.777693	CTRP (PF3D7 0315200)	0.3291
Bangladesh vs Uganda	3	622763	G	C	0.99409	CTRP (PF3D7 0315200)	0.4009
Bangladesh vs Uganda	4	329468	A	T	0.84956	Pfs16 (PF3D7 0406200)	0.4913
Bangladesh vs Uganda	5	1043474	G	T	0.765229	ACS10 (PF3D7 0525100)	0.488
Bangladesh vs Uganda	6	1110981	A	G	0.868561	PF3D7 0627700 (PF3D7 0627700)	0.4753
Bangladesh vs Uganda	6	1114928	A	G	0.782609	ACS (PF3D7 0627800)	0.4704
Bangladesh vs Uganda	6	1114951	C	T	0.781461	ACS (PF3D7 0627800)	0.4699
Bangladesh vs Uganda	6	1116314	T	C	0.782609	ACS (PF3D7 0627800)	0.4624
Bangladesh vs Uganda	6	1117519	A	G	0.782609	ACS (PF3D7 0627800)	0.456
Bangladesh vs Uganda	7	270957	G	A	0.752134	PF3D7 0705500 (PF3D7 0705500)	0.3824
Bangladesh vs Uganda	9	1178963	G	A	0.876406	RhopH2 (PF3D7 0929400)	0.2924
Bangladesh vs Uganda	10	1181683	T	C	0.794739	MTRAP (PF3D7 1028700)	0.468
Bangladesh vs Uganda	11	638299	T	G	0.951229	HSP101 (PF3D7 1116800)	0.4931
Bangladesh vs Uganda	11	1006784	T	C	0.758381	PF3D7 1125700 (PF3D7 1125700)	0.4857
Bangladesh vs Uganda	13	852849	C	A	0.867602	PF3D7 1320700 (PF3D7 1320700)	0.3475
Bangladesh vs Uganda	13	1879453	T	A	0.813966	P47 (PF3D7 1346800)	0.3506
Bangladesh vs Uganda	13	1879488	G	A	0.865594	P47 (PF3D7 1346800)	0.4924
Bangladesh vs Zambia	3	622763	G	C	0.811216	CTRP (PF3D7 0315200)	0.4009
Bangladesh vs Zambia	3	851156	C	T	0.762006	Cap380 (PF3D7 0320400)	0.4239
Bangladesh vs Zambia	5	1042561	T	G	0.848412	ACS10 (PF3D7 0525100)	0.2959
Bangladesh vs Zambia	5	1043474	G	T	0.868342	ACS10 (PF3D7 0525100)	0.488
Bangladesh vs Zambia	6	1110981	A	G	0.776841	PF3D7 0627700 (PF3D7 0627700)	0.4753
Bangladesh vs Zambia	6	1116314	T	C	0.750491	ACS (PF3D7 0627800)	0.4624
Bangladesh vs Zambia	6	1117519	A	G	0.762279	ACS (PF3D7 0627800)	0.456
Bangladesh vs Zambia	7	403625	A	C	0.929341	CRT (PF3D7 0709000)	0.3507
Bangladesh vs Zambia	7	404407	G	T	0.922622	CRT (PF3D7 0709000)	0.3652
Bangladesh vs Zambia	7	404836	C	G	0.929172	CRT (PF3D7 0709000)	0.4596
Bangladesh vs Zambia	9	127644	G	A	0.765816	PF3D7 0902900 (PF3D7 0902900)	0.3612
Bangladesh vs Zambia	9	1178963	G	A	0.822635	RhopH2 (PF3D7 0929400)	0.2924
Bangladesh vs Zambia	9	1179228	G	A	0.881929	RhopH2 (PF3D7 0929400)	0.374
Bangladesh vs Zambia	11	638299	T	G	0.949073	HSP101 (PF3D7 1116800)	0.4931
Bangladesh vs Zambia	13	872241	G	A	0.787382	PF3D7 1321100 (PF3D7 1321100)	0.4408
Bangladesh vs Zambia	13	1879488	G	A	0.865594	P47 (PF3D7 1346800)	0.4924
Bangladesh vs Zambia	13	2435370	A	T	0.812399	FLN (PF3D7 1360800)	0.4409
Bangladesh vs Zambia	14	1666117	T	C	0.781668	PF3D7 1440800 (PF3D7 1440800)	0.3647
Bangladesh vs Zambia	14	2185421	G	T	0.758347	PF3D7 1453200 (PF3D7 1453200)	0.3849
Benin vs Brazil	1	499681	A	T	0.842522	SURF1.1 (PF3D7 0113100)	0.1452
Benin vs Brazil	1	499684	T	G	0.842522	SURF1.1 (PF3D7 0113100)	0.1569
Benin vs Brazil	1	543381	G	A	0.938499	EPF1 (PF3D7 0114000)	0.04504
Benin vs Brazil	2	306156	T	C	0.799308	SERA5 (PF3D7 0207600)	0.4526
Benin vs Brazil	2	511004	G	A	0.949153	PF3D7 0212500 (PF3D7 0212500)	0.3949
Benin vs Brazil	3	622763	G	C	0.83266	CTRP (PF3D7 0315200)	0.4009
Benin vs Brazil	3	890846	C	T	0.983051	PF3D7 0321300 (PF3D7 0321300)	0.03884
Benin vs Brazil	4	236244	C	T	0.814861	PF3D7 0404300 (PF3D7 0404300)	0.09705
Benin vs Brazil	4	677644	A	G	0.898305	PF3D7 0415200 (PF3D7 0415200)	0.115
Benin vs Brazil	4	683888	G	A	0.925424	CRK3 (PF3D7 0415300)	0.1523
Benin vs Brazil	4	738775	G	A	0.860068	PF3D7 0416900 (PF3D7 0416900)	0.2703
Benin vs Brazil	4	748262	T	C	0.99322	DHFR-TS (PF3D7 0417200)	0.1808
Benin vs Brazil	4	757119	A	G	0.80756	PF3D7 0417400 (PF3D7 0417400)	0.3289
Benin vs Brazil	4	839310	A	G	0.774744	PF3D7 0418600 (PF3D7 0418600)	0.2204
Benin vs Brazil	4	988645	T	G	0.799308	PF3D7 0421700 (PF3D7 0421700)	0.399
Benin vs Brazil	4	1100954	A	G	0.764505	SURF4.2 (PF3D7 0424400)	0.4168
Benin vs Brazil	5	269459	T	G	0.894915	PF3D7 0506500 (PF3D7 0506500)	0.3725
Benin vs Brazil	5	949158	A	G	0.827119	PF3D7 0522900 (PF3D7 0522900)	0.2287
Benin vs Brazil	5	966314	C	A	0.890459	PF3D7 0523200 (PF3D7 0523200)	0.163
Benin vs Brazil	6	404679	T	A	0.883239	PF3D7 0609500 (PF3D7 0609500)	0.4538
Benin vs Brazil	6	482969	G	A	0.8157	PF3D7 0611500 (PF3D7 0611500)	0.1406
Benin vs Brazil	6	531935	G	A	0.865172	PF3D7 0612900 (PF3D7 0612900)	0.4488
Benin vs Brazil	6	575829	A	G	0.80449	ApiAP2 (PF3D7 0613800)	0.4066
Benin vs Brazil	6	938238	A	G	0.786457	CS (PF3D7 0623000)	0.4643
Benin vs Brazil	6	1114587	A	T	0.777732	ACS (PF3D7 0627800)	0.3773
Benin vs Brazil	6	1135810	C	T	0.783725	PF3D7 0628100 (PF3D7 0628100)	0.4275
Benin vs Brazil	6	1215233	G	A	0.99661	PF3D7 0629500 (PF3D7 0629500)	0.4207
Benin vs Brazil	6	1224777	T	A	0.783051	SET1 (PF3D7 0629700)	0.2436
Benin vs Brazil	7	375339	A	G	0.782288	PF3D7 0708200 (PF3D7 0708200)	0.3444
Benin vs Brazil	7	378669	G	A	0.857627	BUD32 (PF3D7 0708300)	0.2633
Benin vs Brazil	7	383166	C	T	0.849829	HSP90 ()	0.3432
Benin vs Brazil	7	383527	T	C	0.979522	HSP90 ()	0.1849
Benin vs Brazil	7	385921	C	T	0.853242	PF3D7 0708500 (PF3D7 0708500)	0.4956
Benin vs Brazil	7	403337	G	T	0.966102	CRT ()	0.3022
Benin vs Brazil	7	404836	C	G	0.959044	CRT (PF3D7 0709000)	0.4596
Benin vs Brazil	7	419603	T	A	0.776271	CG2 (PF3D7 0709300)	0.299
Benin vs Brazil	7	451640	T	G	0.80678	PF3D7 0710000 (PF3D7 0710000)	0.2668
Benin vs Brazil	7	455798	G	A	0.83045	PF3D7 0710000 ()	0.3187
Benin vs Brazil	7	473039	A	T	0.842487	PF3D7 0710300 ()	0.1983
Benin vs Brazil	7	473203	G	A	0.892447	PF3D7 0710300 (PF3D7 0710300)	0.1905
Benin vs Brazil	7	473334	A	T	0.902949	PF3D7 0710300 ()	0.155
Benin vs Brazil	7	473404	T	A	0.888947	PF3D7 0710300 ()	0.1673
Benin vs Brazil	7	474754	A	G	0.853943	RAD14 (PF3D7 0710400)	0.1999
Benin vs Brazil	7	620660	T	A	0.854237	PF3D7 0713600 (PF3D7 0713600)	0.2945
Benin vs Brazil	7	866181	A	G	0.957228	PF3D7 0719900 (PF3D7 0719900)	0.09178
Benin vs Brazil	7	1149505	C	T	0.79661	VPS53 (PF3D7 0727000)	0.3538
Benin vs Brazil	8	585841	C	G	0.969181	PF3D7 0811600 (PF3D7 0811600)	0.4498
Benin vs Brazil	8	585854	A	C	0.969181	PF3D7 0811600 (PF3D7 0811600)	0.4093
Benin vs Brazil	8	752747	A	G	0.852925	PF3D7 0816300 (PF3D7 0816300)	0.1372
Benin vs Brazil	8	812561	G	A	0.883532	RON5 ()	0.4888
Benin vs Brazil	8	812570	C	T	0.907372	RON5 ()	0.4889
Benin vs Brazil	8	812667	G	A	0.87055	RON5 (PF3D7 0817700)	0.4691
Benin vs Brazil	8	861388	A	G	0.766319	HSP70 (PF3D7 0818900)	0.4176
Benin vs Brazil	8	882476	A	G	0.860068	PF3D7 0819500 ()	0.09139
Benin vs Brazil	8	1005851	G	C	0.789758	PF3D7 0822800 (PF3D7 0822800)	0.4911
Benin vs Brazil	9	290285	C	T	0.750404	PF3D7 0905800 (PF3D7 0905800)	0.4622
Benin vs Brazil	9	290324	G	A	0.761218	PF3D7 0905800 (PF3D7 0905800)	0.4712
Benin vs Brazil	9	828981	A	G	0.871186	PF3D7 0920200 (PF3D7 0920200)	0.1593
Benin vs Brazil	9	1084846	A	C	0.778157	PF3D7 0926600 (PF3D7 0926600)	0.23
Benin vs Brazil	9	1112623	A	G	0.8	PF3D7 0927200 (PF3D7 0927200)	0.3887
Benin vs Brazil	10	113265	T	C	0.816949	PArt (PF3D7 1002200)	0.4326
Benin vs Brazil	10	1391602	A	C	0.934097	PF3D7 1035100 (PF3D7 1035100)	0.0782
Benin vs Brazil	10	1433547	C	T	0.812227	DBLMSP2 (PF3D7 1036300)	0.4184
Benin vs Brazil	11	307361	G	A	0.8	PAIP1 (PF3D7 1107300)	0.1506
Benin vs Brazil	11	360271	C	T	0.805461	PF3D7 1108100 ()	0.1881
Benin vs Brazil	11	638299	T	G	0.959717	HSP101 (PF3D7 1116800)	0.4931
Benin vs Brazil	11	828596	T	C	0.79661	PF3D7 1121800 (PF3D7 1121800)	0.3175
Benin vs Brazil	11	1120267	T	C	0.760645	PF3D7 1128900 (PF3D7 1128900)	0.3483
Benin vs Brazil	11	1243999	T	C	0.808097	PF3D7 1132100 (PF3D7 1132100)	0.465
Benin vs Brazil	12	49704	A	T	0.812021	VAR2CSA (PF3D7 1200600)	0.1717
Benin vs Brazil	12	52935	T	G	0.775087	VAR2CSA (PF3D7 1200600)	0.1835
Benin vs Brazil	12	63393	G	A	0.849735	ACS7 (PF3D7 1200700)	0.1907
Benin vs Brazil	12	907264	A	G	0.772881	AP2-G (PF3D7 1222600)	0.1695
Benin vs Brazil	12	1114059	T	C	0.750404	CYC2 (PF3D7 1227500)	0.4993
Benin vs Brazil	13	1697887	T	C	0.79655	PMT (PF3D7 1343000)	0.4451
Benin vs Brazil	13	1879488	G	A	0.982906	P47 (PF3D7 1346800)	0.4924
Benin vs Brazil	13	2422766	A	G	0.922034	GCbeta (PF3D7 1360500)	0.1615
Benin vs Brazil	14	161286	G	T	0.809933	PF3D7 1404700 (PF3D7 1404700)	0.347
Benin vs Brazil	14	420628	A	G	0.880546	RAP1 (PF3D7 1410400)	0.1839
Benin vs Brazil	14	1710253	A	T	0.803261	PF3D7 1442200 (PF3D7 1442200)	0.1109
Benin vs Brazil	14	1770207	T	C	0.783051	PF3D7 1443100 (PF3D7 1443100)	0.1937
Benin vs Brazil	14	1993471	T	C	0.82285	PF3D7 1448500 (PF3D7 1448500)	0.4155
Benin vs Brazil	14	2695875	T	C	0.792489	PF3D7 1466200 (PF3D7 1466200)	0.4575
Benin vs Brazil	14	3126183	T	C	0.888136	PF3D7 1475900 (PF3D7 1475900)	0.1439
Benin vs Ecuador	2	306156	T	C	0.799308	SERA5 (PF3D7 0207600)	0.4526
Benin vs Ecuador	2	319674	G	A	0.938567	SERA2 (PF3D7 0207900)	0.4644
Benin vs Ecuador	2	840040	C	A	0.80678	CLAG2 (PF3D7 0220800)	0.2331
Benin vs Ecuador	3	122810	A	G	0.96	CLAG3.2 (PF3D7 0302200)	0.4943
Benin vs Ecuador	3	354502	C	T	0.836768	PF3D7 0308000 (PF3D7 0308000)	0.05498
Benin vs Ecuador	3	618447	A	G	0.764505	CTRP (PF3D7 0315200)	0.3291
Benin vs Ecuador	3	618708	A	G	0.757785	CTRP (PF3D7 0315200)	0.3053
Benin vs Ecuador	3	622763	G	C	0.874576	CTRP (PF3D7 0315200)	0.4009
Benin vs Ecuador	4	738775	G	A	0.860068	PF3D7 0416900 (PF3D7 0416900)	0.2703
Benin vs Ecuador	4	748239	A	T	0.916828	DHFR-TS (PF3D7 0417200)	0.21
Benin vs Ecuador	4	748262	T	C	0.99322	DHFR-TS (PF3D7 0417200)	0.1808
Benin vs Ecuador	4	748410	G	A	0.859649	DHFR-TS (PF3D7 0417200)	0.07098
Benin vs Ecuador	4	757119	A	G	0.760938	PF3D7 0417400 (PF3D7 0417400)	0.3289
Benin vs Ecuador	4	1034437	A	T	0.813559	BRR2 (PF3D7 0422500)	0.1607
Benin vs Ecuador	5	706173	T	A	0.789831	ApiAP2 (PF3D7 0516800)	0.1881
Benin vs Ecuador	5	901719	G	T	0.808683	TAF10 (PF3D7 0522200)	0.01777
Benin vs Ecuador	6	387083	A	G	0.791176	PF3D7 0609000 (PF3D7 0609000)	0.4691
Benin vs Ecuador	6	1011446	A	T	0.986441	PF3D7 0624800 (PF3D7 0624800)	0.03298
Benin vs Ecuador	6	1040344	G	A	0.805461	PF3D7 0625600 (PF3D7 0625600)	0.1671
Benin vs Ecuador	6	1111541	C	T	0.759322	PF3D7 0627700 (PF3D7 0627700)	0.3828
Benin vs Ecuador	6	1224777	T	A	0.783051	SET1 (PF3D7 0629700)	0.2436
Benin vs Ecuador	6	1266213	T	A	0.864407	PF3D7 0630300 (PF3D7 0630300)	0.07475
Benin vs Ecuador	6	1266308	A	T	0.79322	PF3D7 0630300 (PF3D7 0630300)	0.1046
Benin vs Ecuador	6	1289341	A	T	0.764505	PF3D7 0630800 ()	0.3553
Benin vs Ecuador	7	375818	T	C	0.795018	PF3D7 0708200 (PF3D7 0708200)	0.1871
Benin vs Ecuador	7	383166	C	T	0.849829	HSP90 ()	0.3432
Benin vs Ecuador	7	385921	C	T	0.853242	PF3D7 0708500 (PF3D7 0708500)	0.4956
Benin vs Ecuador	7	397135	T	C	0.989831	HSP110c (PF3D7 0708800)	0.06523
Benin vs Ecuador	7	404836	C	G	0.959044	CRT (PF3D7 0709000)	0.4596
Benin vs Ecuador	7	415137	C	T	0.938983	CG2 (PF3D7 0709300)	0.1794
Benin vs Ecuador	7	415245	G	A	0.952542	CG2 (PF3D7 0709300)	0.1559
Benin vs Ecuador	7	415250	T	C	0.955932	CG2 (PF3D7 0709300)	0.1563
Benin vs Ecuador	7	433519	A	T	0.925424	POP1 (PF3D7 0709600)	0.08528
Benin vs Ecuador	7	433609	A	T	0.922034	POP1 (PF3D7 0709600)	0.119
Benin vs Ecuador	7	455798	G	A	0.83045	PF3D7 0710000 ()	0.3187
Benin vs Ecuador	7	602349	G	A	0.830116	RIF ()	0.05541
Benin vs Ecuador	7	620660	T	A	0.854237	PF3D7 0713600 (PF3D7 0713600)	0.2945
Benin vs Ecuador	7	622939	G	A	0.891525	PF3D7 0713700 ()	0.0912
Benin vs Ecuador	7	700840	C	T	0.877966	PF3D7 0715900 (PF3D7 0715900)	0.06115
Benin vs Ecuador	7	1256331	C	T	0.78157	PF3D7 0729500 (PF3D7 0729500)	0.3868
Benin vs Ecuador	8	585841	C	G	0.855378	PF3D7 0811600 (PF3D7 0811600)	0.4498
Benin vs Ecuador	8	585854	A	C	0.768028	PF3D7 0811600 (PF3D7 0811600)	0.4093
Benin vs Ecuador	8	812561	G	A	0.841515	RON5 ()	0.4888
Benin vs Ecuador	8	812570	C	T	0.845407	RON5 ()	0.4889
Benin vs Ecuador	8	812667	G	A	0.833091	RON5 (PF3D7 0817700)	0.4691
Benin vs Ecuador	8	846225	G	T	0.874576	PBLP (PF3D7 0818600)	0.4252
Benin vs Ecuador	8	991389	G	T	0.768142	PF3D7 0822400 (PF3D7 0822400)	0.4443
Benin vs Ecuador	8	1383582	T	C	0.770335	PF3D7 0832000 (PF3D7 0832000)	0.2451
Benin vs Ecuador	9	1054710	T	C	0.80678	PF3D7 0926100 (PF3D7 0926100)	0.3983
Benin vs Ecuador	9	1084846	A	C	0.778157	PF3D7 0926600 (PF3D7 0926600)	0.23
Benin vs Ecuador	9	1179228	G	A	0.862543	RhopH2 (PF3D7 0929400)	0.374
Benin vs Ecuador	9	1179855	A	C	0.952542	RhopH2 (PF3D7 0929400)	0.3811
Benin vs Ecuador	10	1181683	T	C	0.786441	MTRAP (PF3D7 1028700)	0.468
Benin vs Ecuador	10	1391523	G	T	0.765146	PF3D7 1035100 (PF3D7 1035100)	0.2134
Benin vs Ecuador	10	1449646	G	A	0.890785	PF3D7 1036800 (PF3D7 1036800)	0.1156
Benin vs Ecuador	11	828596	T	C	0.79661	PF3D7 1121800 (PF3D7 1121800)	0.3175
Benin vs Ecuador	11	1313769	C	T	0.822526	PF3D7 1133900 (PF3D7 1133900)	0.4948
Benin vs Ecuador	11	1507877	C	T	0.871186	GCalpha (PF3D7 1138400)	0.4567
Benin vs Ecuador	12	1552084	T	C	0.768765	PF3D7 1237200 (PF3D7 1237200)	0.07051
Benin vs Ecuador	12	2151902	T	C	0.809413	PF3D7 1252600 (PF3D7 1252600)	0.4582
Benin vs Ecuador	13	738765	A	T	0.784718	PF3D7 1317700 (PF3D7 1317700)	0.06471
Benin vs Ecuador	13	1228260	T	A	0.788146	MyoC (PF3D7 1329100)	0.0467
Benin vs Ecuador	13	1228360	T	A	0.799225	MyoC (PF3D7 1329100)	0.0525
Benin vs Ecuador	13	1228434	T	G	0.77002	MyoC (PF3D7 1329100)	0.05526
Benin vs Ecuador	13	1228438	G	A	0.77002	MyoC (PF3D7 1329100)	0.0549
Benin vs Ecuador	13	1879488	G	A	1	P47 (PF3D7 1346800)	0.4924
Benin vs Ecuador	13	2257919	C	A	0.893471	ARK3 (PF3D7 1356800)	0.0677
Benin vs Ecuador	13	2422766	A	G	0.835078	GCbeta (PF3D7 1360500)	0.1615
Benin vs Ecuador	14	161286	G	T	0.853242	PF3D7 1404700 (PF3D7 1404700)	0.347
Benin vs Ecuador	14	420628	A	G	0.797015	RAP1 (PF3D7 1410400)	0.1839
Benin vs Ecuador	14	514157	C	T	0.925424	PF3D7 1412700 (PF3D7 1412700)	0.4782
Benin vs Eritrea	2	319674	G	A	0.78972	SERA2 (PF3D7 0207900)	0.4644
Benin vs Eritrea	8	585854	A	C	0.80796	PF3D7 0811600 (PF3D7 0811600)	0.4093
Benin vs Eritrea	8	619138	A	G	0.829352	SSP3 (PF3D7 0812300)	0.454
Benin vs Eritrea	8	1383582	T	C	0.770335	PF3D7 0832000 (PF3D7 0832000)	0.2451
Benin vs Eritrea	8	1383603	C	A	0.764192	PF3D7 0832000 (PF3D7 0832000)	0.2049
Benin vs Eritrea	9	1179228	G	A	0.862543	RhopH2 (PF3D7 0929400)	0.374
Benin vs Eritrea	9	1179855	A	C	0.952542	RhopH2 (PF3D7 0929400)	0.3811
Benin vs Eritrea	11	1006784	T	C	0.792986	PF3D7 1125700 (PF3D7 1125700)	0.4857
Benin vs Eritrea	11	1375988	T	C	0.833877	PPM8 (PF3D7 1135100)	0.4143
Benin vs Eritrea	11	1507877	C	T	0.762887	GCalpha (PF3D7 1138400)	0.4567
Benin vs Eritrea	13	2481108	C	G	0.969283	PF3D7 1361800 (PF3D7 1361800)	0.3507
Benin vs Eritrea	14	1665655	G	T	0.776271	PF3D7 1440800 (PF3D7 1440800)	0.2395
Benin vs French Guiana	1	531181	A	T	0.797101	PF3D7 0113800 (PF3D7 0113800)	0.3442
Benin vs French Guiana	2	306156	T	C	0.799308	SERA5 (PF3D7 0207600)	0.4526
Benin vs French Guiana	2	319674	G	A	0.823765	SERA2 (PF3D7 0207900)	0.4644
Benin vs French Guiana	2	468251	G	A	0.776271	PF3D7 0211600 (PF3D7 0211600)	0.2581
Benin vs French Guiana	2	511004	G	A	0.949153	PF3D7 0212500 (PF3D7 0212500)	0.3949
Benin vs French Guiana	2	623146	T	C	0.762712	PF3D7 0215100 (PF3D7 0215100)	0.4705
Benin vs French Guiana	3	122810	A	G	0.913043	CLAG3.2 (PF3D7 0302200)	0.4943
Benin vs French Guiana	3	618447	A	G	0.764505	CTRP (PF3D7 0315200)	0.3291
Benin vs French Guiana	3	622763	G	C	0.874576	CTRP (PF3D7 0315200)	0.4009
Benin vs French Guiana	4	683888	G	A	0.925424	CRK3 (PF3D7 0415300)	0.1523
Benin vs French Guiana	4	748262	T	C	0.99322	DHFR-TS (PF3D7 0417200)	0.1808
Benin vs French Guiana	4	757119	A	G	0.80756	PF3D7 0417400 (PF3D7 0417400)	0.3289
Benin vs French Guiana	4	839310	A	G	0.774744	PF3D7 0418600 (PF3D7 0418600)	0.2204
Benin vs French Guiana	4	856082	A	G	0.817593	PF3D7 0419300 (PF3D7 0419300)	0.4872
Benin vs French Guiana	5	949158	A	G	0.827119	PF3D7 0522900 (PF3D7 0522900)	0.2287
Benin vs French Guiana	5	966314	C	A	0.890459	PF3D7 0523200 (PF3D7 0523200)	0.163
Benin vs French Guiana	6	404679	T	A	0.922034	PF3D7 0609500 (PF3D7 0609500)	0.4538
Benin vs French Guiana	6	482969	G	A	0.8157	PF3D7 0611500 (PF3D7 0611500)	0.1406
Benin vs French Guiana	6	531935	G	A	0.905085	PF3D7 0612900 (PF3D7 0612900)	0.4488
Benin vs French Guiana	6	575829	A	G	0.847458	ApiAP2 (PF3D7 0613800)	0.4066
Benin vs French Guiana	6	938238	A	G	0.830508	CS (PF3D7 0623000)	0.4643
Benin vs French Guiana	6	1114587	A	T	0.823729	ACS (PF3D7 0627800)	0.3773
Benin vs French Guiana	6	1135810	C	T	0.829352	PF3D7 0628100 (PF3D7 0628100)	0.4275
Benin vs French Guiana	6	1141114	G	A	0.783505	PF3D7 0628100 (PF3D7 0628100)	0.346
Benin vs French Guiana	6	1215233	G	A	0.99661	PF3D7 0629500 (PF3D7 0629500)	0.4207
Benin vs French Guiana	6	1224777	T	A	0.783051	SET1 (PF3D7 0629700)	0.2436
Benin vs French Guiana	7	375339	A	G	0.782288	PF3D7 0708200 (PF3D7 0708200)	0.3444
Benin vs French Guiana	7	378669	G	A	0.857627	BUD32 (PF3D7 0708300)	0.2633
Benin vs French Guiana	7	383166	C	T	0.849829	HSP90 ()	0.3432
Benin vs French Guiana	7	383527	T	C	0.979522	HSP90 ()	0.1849
Benin vs French Guiana	7	385921	C	T	0.853242	PF3D7 0708500 (PF3D7 0708500)	0.4956
Benin vs French Guiana	7	403337	G	T	0.966102	CRT ()	0.3022
Benin vs French Guiana	7	404836	C	G	0.959044	CRT (PF3D7 0709000)	0.4596
Benin vs French Guiana	7	419603	T	A	0.776271	CG2 (PF3D7 0709300)	0.299
Benin vs French Guiana	7	451640	T	G	0.80678	PF3D7 0710000 (PF3D7 0710000)	0.2668
Benin vs French Guiana	7	455798	G	A	0.83045	PF3D7 0710000 ()	0.3187
Benin vs French Guiana	7	620660	T	A	0.854237	PF3D7 0713600 (PF3D7 0713600)	0.2945
Benin vs French Guiana	7	866181	A	G	0.922055	PF3D7 0719900 (PF3D7 0719900)	0.09178
Benin vs French Guiana	8	585841	C	G	0.986441	PF3D7 0811600 (PF3D7 0811600)	0.4498
Benin vs French Guiana	8	585854	A	C	0.986441	PF3D7 0811600 (PF3D7 0811600)	0.4093
Benin vs French Guiana	8	812561	G	A	0.924915	RON5 ()	0.4888
Benin vs French Guiana	8	812570	C	T	0.928328	RON5 ()	0.4889
Benin vs French Guiana	8	812667	G	A	0.917526	RON5 (PF3D7 0817700)	0.4691
Benin vs French Guiana	8	861388	A	G	0.812287	HSP70 (PF3D7 0818900)	0.4176
Benin vs French Guiana	8	1005851	G	C	0.837288	PF3D7 0822800 (PF3D7 0822800)	0.4911
Benin vs French Guiana	9	290285	C	T	0.79661	PF3D7 0905800 (PF3D7 0905800)	0.4622
Benin vs French Guiana	9	290324	G	A	0.80678	PF3D7 0905800 (PF3D7 0905800)	0.4712
Benin vs French Guiana	9	512739	G	C	0.772881	CRMP1 (PF3D7 0911300)	0.3466
Benin vs French Guiana	9	589646	C	T	0.81923	PF3D7 0913700 (PF3D7 0913700)	0.3975
Benin vs French Guiana	9	589649	C	T	0.81923	PF3D7 0913700 (PF3D7 0913700)	0.3973
Benin vs French Guiana	9	631776	C	T	0.850847	PF3D7 0914700 (PF3D7 0914700)	0.4497
Benin vs French Guiana	9	828981	A	G	0.779824	PF3D7 0920200 (PF3D7 0920200)	0.1593
Benin vs French Guiana	9	1084846	A	C	0.778157	PF3D7 0926600 (PF3D7 0926600)	0.23
Benin vs French Guiana	9	1112623	A	G	0.8	PF3D7 0927200 (PF3D7 0927200)	0.3887
Benin vs French Guiana	9	1179228	G	A	0.800728	RhopH2 (PF3D7 0929400)	0.374
Benin vs French Guiana	10	1433547	C	T	0.812227	DBLMSP2 (PF3D7 1036300)	0.4184
Benin vs French Guiana	11	307361	G	A	0.8	PAIP1 (PF3D7 1107300)	0.1506
Benin vs French Guiana	11	638299	T	G	0.99322	HSP101 (PF3D7 1116800)	0.4931
Benin vs French Guiana	11	828596	T	C	0.79661	PF3D7 1121800 (PF3D7 1121800)	0.3175
Benin vs French Guiana	13	1697887	T	C	0.840678	PMT (PF3D7 1343000)	0.4451
Benin vs French Guiana	13	1879488	G	A	1	P47 (PF3D7 1346800)	0.4924
Benin vs French Guiana	13	2422766	A	G	0.922034	GCbeta (PF3D7 1360500)	0.1615
Benin vs French Guiana	14	41328	A	T	0.825008	PF3D7 1401100 (PF3D7 1401100)	0.1218
Benin vs French Guiana	14	161286	G	T	0.853242	PF3D7 1404700 (PF3D7 1404700)	0.347
Benin vs French Guiana	14	420628	A	G	0.880546	RAP1 (PF3D7 1410400)	0.1839
Benin vs French Guiana	14	683666	G	A	0.79322	PF3D7 1416800 (PF3D7 1416800)	0.4109
Benin vs French Guiana	14	1710253	A	T	0.751062	PF3D7 1442200 (PF3D7 1442200)	0.1109
Benin vs French Guiana	14	1993471	T	C	0.901695	PF3D7 1448500 (PF3D7 1448500)	0.4155
Benin vs Guyana	1	531181	A	T	0.797101	PF3D7 0113800 (PF3D7 0113800)	0.3442
Benin vs Guyana	2	306156	T	C	0.799308	SERA5 (PF3D7 0207600)	0.4526
Benin vs Guyana	2	468251	G	A	0.776271	PF3D7 0211600 (PF3D7 0211600)	0.2581
Benin vs Guyana	2	511004	G	A	0.949153	PF3D7 0212500 (PF3D7 0212500)	0.3949
Benin vs Guyana	2	623146	T	C	0.759811	PF3D7 0215100 (PF3D7 0215100)	0.4705
Benin vs Guyana	3	618447	A	G	0.75941	CTRP (PF3D7 0315200)	0.3291
Benin vs Guyana	3	622763	G	C	0.868873	CTRP (PF3D7 0315200)	0.4009
Benin vs Guyana	4	677644	A	G	0.885714	PF3D7 0415200 (PF3D7 0415200)	0.115
Benin vs Guyana	4	683888	G	A	0.923521	CRK3 (PF3D7 0415300)	0.1523
Benin vs Guyana	4	748262	T	C	0.99322	DHFR-TS (PF3D7 0417200)	0.1808
Benin vs Guyana	4	757119	A	G	0.80756	PF3D7 0417400 (PF3D7 0417400)	0.3289
Benin vs Guyana	4	839310	A	G	0.774744	PF3D7 0418600 (PF3D7 0418600)	0.2204
Benin vs Guyana	5	949158	A	G	0.827119	PF3D7 0522900 (PF3D7 0522900)	0.2287
Benin vs Guyana	5	966314	C	A	0.889498	PF3D7 0523200 (PF3D7 0523200)	0.163
Benin vs Guyana	6	404679	T	A	0.922034	PF3D7 0609500 (PF3D7 0609500)	0.4538
Benin vs Guyana	6	531935	G	A	0.905085	PF3D7 0612900 (PF3D7 0612900)	0.4488
Benin vs Guyana	6	575829	A	G	0.846283	ApiAP2 (PF3D7 0613800)	0.4066
Benin vs Guyana	6	938238	A	G	0.829975	CS (PF3D7 0623000)	0.4643
Benin vs Guyana	6	1114587	A	T	0.823729	ACS (PF3D7 0627800)	0.3773
Benin vs Guyana	6	1135810	C	T	0.824535	PF3D7 0628100 (PF3D7 0628100)	0.4275
Benin vs Guyana	6	1141114	G	A	0.775638	PF3D7 0628100 (PF3D7 0628100)	0.346
Benin vs Guyana	6	1215233	G	A	0.99661	PF3D7 0629500 (PF3D7 0629500)	0.4207
Benin vs Guyana	6	1224777	T	A	0.783051	SET1 (PF3D7 0629700)	0.2436
Benin vs Guyana	7	375339	A	G	0.782288	PF3D7 0708200 (PF3D7 0708200)	0.3444
Benin vs Guyana	7	378669	G	A	0.857627	BUD32 (PF3D7 0708300)	0.2633
Benin vs Guyana	7	383166	C	T	0.849829	HSP90 ()	0.3432
Benin vs Guyana	7	383527	T	C	0.979522	HSP90 ()	0.1849
Benin vs Guyana	7	385921	C	T	0.853242	PF3D7 0708500 (PF3D7 0708500)	0.4956
Benin vs Guyana	7	403337	G	T	0.966102	CRT ()	0.3022
Benin vs Guyana	7	404836	C	G	0.959044	CRT (PF3D7 0709000)	0.4596
Benin vs Guyana	7	419603	T	A	0.776271	CG2 (PF3D7 0709300)	0.299
Benin vs Guyana	7	451640	T	G	0.80678	PF3D7 0710000 (PF3D7 0710000)	0.2668
Benin vs Guyana	7	455798	G	A	0.83045	PF3D7 0710000 ()	0.3187
Benin vs Guyana	7	620660	T	A	0.854237	PF3D7 0713600 (PF3D7 0713600)	0.2945
Benin vs Guyana	7	866181	A	G	0.89958	PF3D7 0719900 (PF3D7 0719900)	0.09178
Benin vs Guyana	7	1149505	C	T	0.79661	VPS53 (PF3D7 0727000)	0.3538
Benin vs Guyana	8	585841	C	G	0.985974	PF3D7 0811600 (PF3D7 0811600)	0.4498
Benin vs Guyana	8	585854	A	C	0.971	PF3D7 0811600 (PF3D7 0811600)	0.4093
Benin vs Guyana	8	812561	G	A	0.921153	RON5 ()	0.4888
Benin vs Guyana	8	812570	C	T	0.925511	RON5 ()	0.4889
Benin vs Guyana	8	812667	G	A	0.913623	RON5 (PF3D7 0817700)	0.4691
Benin vs Guyana	8	861388	A	G	0.812287	HSP70 (PF3D7 0818900)	0.4176
Benin vs Guyana	8	1005851	G	C	0.837288	PF3D7 0822800 (PF3D7 0822800)	0.4911
Benin vs Guyana	9	290285	C	T	0.79661	PF3D7 0905800 (PF3D7 0905800)	0.4622
Benin vs Guyana	9	290324	G	A	0.805699	PF3D7 0905800 (PF3D7 0905800)	0.4712
Benin vs Guyana	9	512739	G	C	0.771747	CRMP1 (PF3D7 0911300)	0.3466
Benin vs Guyana	9	1112623	A	G	0.8	PF3D7 0927200 (PF3D7 0927200)	0.3887
Benin vs Guyana	10	1433547	C	T	0.812227	DBLMSP2 (PF3D7 1036300)	0.4184
Benin vs Guyana	11	307361	G	A	0.8	PAIP1 (PF3D7 1107300)	0.1506
Benin vs Guyana	11	360271	C	T	0.774581	PF3D7 1108100 ()	0.1881
Benin vs Guyana	11	638299	T	G	0.990671	HSP101 (PF3D7 1116800)	0.4931
Benin vs Guyana	11	828596	T	C	0.79661	PF3D7 1121800 (PF3D7 1121800)	0.3175
Benin vs Guyana	11	1375988	T	C	0.777861	PPM8 (PF3D7 1135100)	0.4143
Benin vs Guyana	12	1114059	T	C	0.79661	CYC2 (PF3D7 1227500)	0.4993
Benin vs Guyana	12	2155095	T	G	0.755932	PF3D7 1252700 (PF3D7 1252700)	0.3741
Benin vs Guyana	13	1879488	G	A	1	P47 (PF3D7 1346800)	0.4924
Benin vs Guyana	13	2422766	A	G	0.922034	GCbeta (PF3D7 1360500)	0.1615
Benin vs Guyana	13	2481108	C	G	0.947	PF3D7 1361800 (PF3D7 1361800)	0.3507
Benin vs Guyana	14	41328	A	T	0.832372	PF3D7 1401100 (PF3D7 1401100)	0.1218
Benin vs Guyana	14	161286	G	T	0.853242	PF3D7 1404700 (PF3D7 1404700)	0.347
Benin vs Guyana	14	256529	G	C	0.786675	CCp3 (PF3D7 1407000)	0.482
Benin vs Guyana	14	420628	A	G	0.880546	RAP1 (PF3D7 1410400)	0.1839
Benin vs Guyana	14	514157	C	T	0.83572	PF3D7 1412700 (PF3D7 1412700)	0.4782
Benin vs Guyana	14	673692	T	C	0.770051	PF3D7 1416600 (PF3D7 1416600)	0.1089
Benin vs Guyana	14	683666	G	A	0.79322	PF3D7 1416800 (PF3D7 1416800)	0.4109
Benin vs Guyana	14	1710253	A	T	0.881464	PF3D7 1442200 (PF3D7 1442200)	0.1109
Benin vs Guyana	14	1993471	T	C	0.900739	PF3D7 1448500 (PF3D7 1448500)	0.4155
Benin vs India	3	618447	A	G	0.764505	CTRP (PF3D7 0315200)	0.3291
Benin vs India	3	618708	A	G	0.757785	CTRP (PF3D7 0315200)	0.3053
Benin vs India	3	622763	G	C	0.86446	CTRP (PF3D7 0315200)	0.4009
Benin vs India	3	851156	C	T	0.774321	Cap380 (PF3D7 0320400)	0.4239
Benin vs India	4	329468	A	T	0.841181	Pfs16 (PF3D7 0406200)	0.4913
Benin vs India	4	748239	A	T	0.864307	DHFR-TS (PF3D7 0417200)	0.21
Benin vs India	6	1110981	A	G	0.854237	PF3D7 0627700 (PF3D7 0627700)	0.4753
Benin vs India	6	1114928	A	G	0.796501	ACS (PF3D7 0627800)	0.4704
Benin vs India	6	1114951	C	T	0.798575	ACS (PF3D7 0627800)	0.4699
Benin vs India	6	1116314	T	C	0.789881	ACS (PF3D7 0627800)	0.4624
Benin vs India	6	1117519	A	G	0.837505	ACS (PF3D7 0627800)	0.456
Benin vs India	7	105304	T	C	0.804339	PF3D7 0702500 (PF3D7 0702500)	0.4706
Benin vs India	8	585841	C	G	0.846839	PF3D7 0811600 (PF3D7 0811600)	0.4498
Benin vs India	8	585854	A	C	0.891174	PF3D7 0811600 (PF3D7 0811600)	0.4093
Benin vs India	11	638299	T	G	0.935852	HSP101 (PF3D7 1116800)	0.4931
Benin vs India	12	2151902	T	C	0.771472	PF3D7 1252600 (PF3D7 1252600)	0.4582
Benin vs India	13	872241	G	A	0.783764	PF3D7 1321100 (PF3D7 1321100)	0.4408
Benin vs India	13	1879488	G	A	0.792869	P47 (PF3D7 1346800)	0.4924
Benin vs India	13	2479113	C	G	0.820101	PF3D7 1361800 (PF3D7 1361800)	0.3359
Benin vs India	13	2481108	C	G	0.952099	PF3D7 1361800 (PF3D7 1361800)	0.3507
Benin vs Indonesia	1	180379	T	A	0.813559	PF3D7 0104100 (PF3D7 0104100)	0.4388
Benin vs Indonesia	2	319674	G	A	0.938567	SERA2 (PF3D7 0207900)	0.4644
Benin vs Indonesia	2	511004	G	A	0.908378	PF3D7 0212500 (PF3D7 0212500)	0.3949
Benin vs Indonesia	2	623146	T	C	0.762712	PF3D7 0215100 (PF3D7 0215100)	0.4705
Benin vs Indonesia	3	361195	G	A	0.791029	PF3D7 0308100 (PF3D7 0308100)	0.4164
Benin vs Indonesia	3	361199	C	T	0.798028	PF3D7 0308100 (PF3D7 0308100)	0.4175
Benin vs Indonesia	3	618447	A	G	0.764505	CTRP (PF3D7 0315200)	0.3291
Benin vs Indonesia	3	618708	A	G	0.757785	CTRP (PF3D7 0315200)	0.3053
Benin vs Indonesia	3	622763	G	C	0.874576	CTRP (PF3D7 0315200)	0.4009
Benin vs Indonesia	3	851156	C	T	0.810997	Cap380 (PF3D7 0320400)	0.4239
Benin vs Indonesia	4	329468	A	T	0.969492	Pfs16 (PF3D7 0406200)	0.4913
Benin vs Indonesia	4	748239	A	T	0.986441	DHFR-TS (PF3D7 0417200)	0.21
Benin vs Indonesia	5	269459	T	G	0.894915	PF3D7 0506500 (PF3D7 0506500)	0.3725
Benin vs Indonesia	5	643899	A	G	0.788396	PF3D7 0515500 (PF3D7 0515500)	0.4356
Benin vs Indonesia	5	930435	C	T	0.776271	PF3D7 0522400 (PF3D7 0522400)	0.4172
Benin vs Indonesia	5	1043474	G	T	0.829543	ACS10 (PF3D7 0525100)	0.488
Benin vs Indonesia	6	346856	A	C	0.865207	PF3D7 0608300 (PF3D7 0608300)	0.4309
Benin vs Indonesia	6	387083	A	G	0.877966	PF3D7 0609000 (PF3D7 0609000)	0.4691
Benin vs Indonesia	6	389754	A	G	0.830508	PF3D7 0609100 (PF3D7 0609100)	0.4064
Benin vs Indonesia	6	404679	T	A	0.907656	PF3D7 0609500 (PF3D7 0609500)	0.4538
Benin vs Indonesia	6	510595	C	T	0.751517	EIF3L (PF3D7 0612100)	0.3884
Benin vs Indonesia	6	531935	G	A	0.885521	PF3D7 0612900 (PF3D7 0612900)	0.4488
Benin vs Indonesia	6	575829	A	G	0.847458	ApiAP2 (PF3D7 0613800)	0.4066
Benin vs Indonesia	6	851736	C	T	0.804669	MSP10 (PF3D7 0620400)	0.4696
Benin vs Indonesia	6	1110981	A	G	0.854237	PF3D7 0627700 (PF3D7 0627700)	0.4753
Benin vs Indonesia	6	1114587	A	T	0.823729	ACS (PF3D7 0627800)	0.3773
Benin vs Indonesia	6	1114625	A	C	0.823729	ACS (PF3D7 0627800)	0.4544
Benin vs Indonesia	6	1114928	A	G	0.850847	ACS (PF3D7 0627800)	0.4704
Benin vs Indonesia	6	1114951	C	T	0.850847	ACS (PF3D7 0627800)	0.4699
Benin vs Indonesia	6	1116314	T	C	0.853242	ACS (PF3D7 0627800)	0.4624
Benin vs Indonesia	6	1117519	A	G	0.850847	ACS (PF3D7 0627800)	0.456
Benin vs Indonesia	6	1135810	C	T	0.829352	PF3D7 0628100 (PF3D7 0628100)	0.4275
Benin vs Indonesia	6	1141114	G	A	0.783505	PF3D7 0628100 (PF3D7 0628100)	0.346
Benin vs Indonesia	7	105304	T	C	0.960761	PF3D7 0702500 (PF3D7 0702500)	0.4706
Benin vs Indonesia	7	385921	C	T	0.853242	PF3D7 0708500 (PF3D7 0708500)	0.4956
Benin vs Indonesia	7	403337	G	T	0.948384	CRT ()	0.3022
Benin vs Indonesia	7	404836	C	G	0.959044	CRT (PF3D7 0709000)	0.4596
Benin vs Indonesia	7	435413	C	T	0.75578	PF3D7 0709700 (PF3D7 0709700)	0.02794
Benin vs Indonesia	7	473203	G	A	0.796115	PF3D7 0710300 (PF3D7 0710300)	0.1905
Benin vs Indonesia	7	473404	T	A	0.753489	PF3D7 0710300 ()	0.1673
Benin vs Indonesia	7	1168250	T	A	0.752577	PF3D7 0727600 (PF3D7 0727600)	0.4566
Benin vs Indonesia	8	416605	A	G	0.797019	PF3D7 0808200 (PF3D7 0808200)	0.2722
Benin vs Indonesia	8	585854	A	C	0.986441	PF3D7 0811600 (PF3D7 0811600)	0.4093
Benin vs Indonesia	8	619138	A	G	0.829352	SSP3 (PF3D7 0812300)	0.454
Benin vs Indonesia	8	812561	G	A	0.89607	RON5 ()	0.4888
Benin vs Indonesia	8	812570	C	T	0.899652	RON5 ()	0.4889
Benin vs Indonesia	8	812667	G	A	0.888068	RON5 (PF3D7 0817700)	0.4691
Benin vs Indonesia	8	846225	G	T	0.874576	PBLP (PF3D7 0818600)	0.4252
Benin vs Indonesia	8	861388	A	G	0.789716	HSP70 (PF3D7 0818900)	0.4176
Benin vs Indonesia	8	991389	G	T	0.857627	PF3D7 0822400 (PF3D7 0822400)	0.4443
Benin vs Indonesia	8	1002018	T	C	0.924915	PF3D7 0822700 (PF3D7 0822700)	0.2002
Benin vs Indonesia	8	1005851	G	C	0.837288	PF3D7 0822800 (PF3D7 0822800)	0.4911
Benin vs Indonesia	8	1117018	C	T	0.780578	PF3D7 0826100 (PF3D7 0826100)	0.4726
Benin vs Indonesia	9	290285	C	T	0.762039	PF3D7 0905800 (PF3D7 0905800)	0.4622
Benin vs Indonesia	9	290324	G	A	0.77836	PF3D7 0905800 (PF3D7 0905800)	0.4712
Benin vs Indonesia	9	512326	A	C	0.871186	CRMP1 (PF3D7 0911300)	0.4501
Benin vs Indonesia	9	512739	G	C	0.772881	CRMP1 (PF3D7 0911300)	0.3466
Benin vs Indonesia	9	516978	G	A	0.867797	CRMP1 (PF3D7 0911300)	0.4444
Benin vs Indonesia	9	1054710	T	C	0.77836	PF3D7 0926100 (PF3D7 0926100)	0.3983
Benin vs Indonesia	9	1179855	A	C	0.952542	RhopH2 (PF3D7 0929400)	0.3811
Benin vs Indonesia	9	1406576	G	A	0.898305	GIG (PF3D7 0935600)	0.4711
Benin vs Indonesia	10	605295	T	A	0.783014	PF3D7 1014900 (PF3D7 1014900)	0.4687
Benin vs Indonesia	10	653138	C	T	0.813559	GBP (PF3D7 1016300)	0.3729
Benin vs Indonesia	10	658468	C	T	0.976271	FIKK10.1 (PF3D7 1016400)	0.2286
Benin vs Indonesia	10	1181683	T	C	0.751384	MTRAP (PF3D7 1028700)	0.468
Benin vs Indonesia	11	480718	C	T	0.82624	PF3D7 1112600 (PF3D7 1112600)	0.3219
Benin vs Indonesia	11	638299	T	G	0.99322	HSP101 (PF3D7 1116800)	0.4931
Benin vs Indonesia	11	1006784	T	C	0.835826	PF3D7 1125700 (PF3D7 1125700)	0.4857
Benin vs Indonesia	11	1243999	T	C	0.850847	PF3D7 1132100 (PF3D7 1132100)	0.465
Benin vs Indonesia	11	1375988	T	C	0.932203	PPM8 (PF3D7 1135100)	0.4143
Benin vs Indonesia	11	1507877	C	T	0.840204	GCalpha (PF3D7 1138400)	0.4567
Benin vs Indonesia	12	1114059	T	C	0.79661	CYC2 (PF3D7 1227500)	0.4993
Benin vs Indonesia	12	1162825	A	C	0.818332	MSP9 (PF3D7 1228600)	0.4934
Benin vs Indonesia	12	2151902	T	C	0.891525	PF3D7 1252600 (PF3D7 1252600)	0.4582
Benin vs Indonesia	13	852849	C	A	0.755932	PF3D7 1320700 (PF3D7 1320700)	0.3475
Benin vs Indonesia	13	872241	G	A	0.840178	PF3D7 1321100 (PF3D7 1321100)	0.4408
Benin vs Indonesia	13	1257063	A	G	0.854237	PF3D7 1329500 (PF3D7 1329500)	0.4165
Benin vs Indonesia	13	1697887	T	C	0.819024	PMT (PF3D7 1343000)	0.4451
Benin vs Indonesia	13	1700345	T	C	0.910024	PF3D7 1343100 (PF3D7 1343100)	0.3262
Benin vs Indonesia	13	1858907	C	T	0.879725	PF3D7 1346400 (PF3D7 1346400)	0.4592
Benin vs Indonesia	13	1879488	G	A	1	P47 (PF3D7 1346800)	0.4924
Benin vs Indonesia	13	2435370	A	T	0.822526	FLN (PF3D7 1360800)	0.4409
Benin vs Indonesia	13	2479113	C	G	0.84669	PF3D7 1361800 (PF3D7 1361800)	0.3359
Benin vs Indonesia	13	2481108	C	G	0.969283	PF3D7 1361800 (PF3D7 1361800)	0.3507
Benin vs Indonesia	14	161286	G	T	0.853242	PF3D7 1404700 (PF3D7 1404700)	0.347
Benin vs Indonesia	14	683666	G	A	0.77582	PF3D7 1416800 (PF3D7 1416800)	0.4109
Benin vs Indonesia	14	711335	G	A	0.861017	ATG4 (PF3D7 1417300)	0.4891
Benin vs Indonesia	14	1562642	T	A	0.775697	PF3D7 1438600 (PF3D7 1438600)	0.4934
Benin vs Indonesia	14	1665655	G	T	0.776271	PF3D7 1440800 (PF3D7 1440800)	0.2395
Benin vs Indonesia	14	1666117	T	C	0.891525	PF3D7 1440800 (PF3D7 1440800)	0.3647
Benin vs Indonesia	14	1748662	G	T	0.757679	PF3D7 1442700 (PF3D7 1442700)	0.4921
Benin vs Indonesia	14	1993471	T	C	0.886937	PF3D7 1448500 (PF3D7 1448500)	0.4155
Benin vs Indonesia	14	2364543	A	T	0.823729	PF3D7 1457600 (PF3D7 1457600)	0.4767
Benin vs Indonesia	14	2695875	T	C	0.836177	PF3D7 1466200 (PF3D7 1466200)	0.4575
Benin vs Indonesia	14	3101577	C	G	0.868873	CRMP4 (PF3D7 1475400)	0.4616
Benin vs Ivory Coast	7	404836	C	G	0.759911	CRT (PF3D7 0709000)	0.4596
Benin vs Madagascar	6	1215233	G	A	0.99661	PF3D7 0629500 (PF3D7 0629500)	0.4207
Benin vs Madagascar	7	105304	T	C	0.895544	PF3D7 0702500 (PF3D7 0702500)	0.4706
Benin vs Madagascar	7	385921	C	T	0.853242	PF3D7 0708500 (PF3D7 0708500)	0.4956
Benin vs Madagascar	7	403625	A	C	0.959322	CRT (PF3D7 0709000)	0.3507
Benin vs Madagascar	7	404407	G	T	0.952218	CRT (PF3D7 0709000)	0.3652
Benin vs Madagascar	7	404836	C	G	0.959044	CRT (PF3D7 0709000)	0.4596
Benin vs Madagascar	9	1178963	G	A	0.786027	RhopH2 (PF3D7 0929400)	0.2924
Benin vs Madagascar	9	1179228	G	A	0.862543	RhopH2 (PF3D7 0929400)	0.374
Benin vs Madagascar	9	1179855	A	C	0.901694	RhopH2 (PF3D7 0929400)	0.3811
Benin vs Madagascar	11	1006784	T	C	0.861027	PF3D7 1125700 (PF3D7 1125700)	0.4857
Benin vs Madagascar	11	1375988	T	C	0.774433	PPM8 (PF3D7 1135100)	0.4143
Benin vs Madagascar	13	2479113	C	G	0.84669	PF3D7 1361800 (PF3D7 1361800)	0.3359
Benin vs Madagascar	13	2481108	C	G	0.969283	PF3D7 1361800 (PF3D7 1361800)	0.3507
Benin vs Madagascar	14	161286	G	T	0.793459	PF3D7 1404700 (PF3D7 1404700)	0.347
Benin vs Mozambique	7	105304	T	C	0.783621	PF3D7 0702500 (PF3D7 0702500)	0.4706
Benin vs Mozambique	7	403625	A	C	0.938831	CRT (PF3D7 0709000)	0.3507
Benin vs Mozambique	7	404407	G	T	0.936036	CRT (PF3D7 0709000)	0.3652
Benin vs Mozambique	7	404836	C	G	0.933173	CRT (PF3D7 0709000)	0.4596
Benin vs Mozambique	9	1179855	A	C	0.826994	RhopH2 (PF3D7 0929400)	0.3811
Benin vs Mozambique	13	2481108	C	G	0.834603	PF3D7 1361800 (PF3D7 1361800)	0.3507
Benin vs Mozambique	14	1665655	G	T	0.776271	PF3D7 1440800 (PF3D7 1440800)	0.2395
Benin vs Sudan	4	748262	T	C	0.777596	DHFR-TS (PF3D7 0417200)	0.1808
Benin vs Sudan	8	585854	A	C	0.771537	PF3D7 0811600 (PF3D7 0811600)	0.4093
Benin vs Sudan	9	1179855	A	C	0.802153	RhopH2 (PF3D7 0929400)	0.3811
Benin vs Zambia	5	1108445	G	T	0.775189	PF3D7 0526600 (PF3D7 0526600)	0.4536
Benin vs Zambia	7	385921	C	T	0.817764	PF3D7 0708500 (PF3D7 0708500)	0.4956
Benin vs Zambia	7	403625	A	C	0.959322	CRT (PF3D7 0709000)	0.3507
Benin vs Zambia	7	404407	G	T	0.952218	CRT (PF3D7 0709000)	0.3652
Benin vs Zambia	7	404836	C	G	0.959044	CRT (PF3D7 0709000)	0.4596
Benin vs Zambia	9	1179228	G	A	0.807424	RhopH2 (PF3D7 0929400)	0.374
Benin vs Zambia	9	1179855	A	C	0.907396	RhopH2 (PF3D7 0929400)	0.3811
Benin vs Zambia	13	2479113	C	G	0.795559	PF3D7 1361800 (PF3D7 1361800)	0.3359
Benin vs Zambia	13	2481108	C	G	0.950519	PF3D7 1361800 (PF3D7 1361800)	0.3507
Brazil vs Ecuador	1	114473	T	G	0.983471	EBA181 (PF3D7 0102500)	0.2865
Brazil vs Ecuador	1	144870	A	G	0.932773	PF3D7 0103300 (PF3D7 0103300)	0.4697
Brazil vs Ecuador	1	144877	A	G	0.932773	PF3D7 0103300 (PF3D7 0103300)	0.4687
Brazil vs Ecuador	1	155977	G	A	0.891578	PF3D7 0103500 (PF3D7 0103500)	0.1454
Brazil vs Ecuador	1	155978	C	T	0.891578	PF3D7 0103500 (PF3D7 0103500)	0.1452
Brazil vs Ecuador	1	165588	C	T	0.874787	PF3D7 0103600 (PF3D7 0103600)	0.346
Brazil vs Ecuador	1	179969	G	A	0.834969	PF3D7 0104100 (PF3D7 0104100)	0.3056
Brazil vs Ecuador	1	180186	A	G	0.854864	PF3D7 0104100 (PF3D7 0104100)	0.1252
Brazil vs Ecuador	1	387722	C	T	0.785044	PF3D7 0109950 (PF3D7 0109950)	0.148
Brazil vs Ecuador	1	487057	C	T	0.894741	PF3D7 0112900 (PF3D7 0112900)	0.2625
Brazil vs Ecuador	1	499681	A	T	0.864377	SURF1.1 (PF3D7 0113100)	0.1452
Brazil vs Ecuador	1	499684	T	G	0.864377	SURF1.1 (PF3D7 0113100)	0.1569
Brazil vs Ecuador	1	530293	C	T	0.897436	PF3D7 0113800 (PF3D7 0113800)	0.3776
Brazil vs Ecuador	1	530455	T	C	0.841981	PF3D7 0113800 (PF3D7 0113800)	0.4797
Brazil vs Ecuador	1	530463	G	A	0.841981	PF3D7 0113800 (PF3D7 0113800)	0.3034
Brazil vs Ecuador	1	530521	C	G	0.846387	PF3D7 0113800 (PF3D7 0113800)	0.2361
Brazil vs Ecuador	1	530605	G	A	0.877311	PF3D7 0113800 (PF3D7 0113800)	0.2115
Brazil vs Ecuador	1	531103	T	A	0.982301	PF3D7 0113800 (PF3D7 0113800)	0.1903
Brazil vs Ecuador	1	531181	A	T	0.950617	PF3D7 0113800 (PF3D7 0113800)	0.3442
Brazil vs Ecuador	1	534946	C	T	1	PF3D7 0113800 (PF3D7 0113800)	0.4667
Brazil vs Ecuador	1	543381	G	A	0.964602	EPF1 (PF3D7 0114000)	0.04504
Brazil vs Ecuador	2	290673	T	A	0.906977	SERA8 (PF3D7 0207300)	0.3706
Brazil vs Ecuador	2	339959	C	T	0.836735	PF3D7 0208300 (PF3D7 0208300)	0.2218
Brazil vs Ecuador	2	366771	G	A	1	P230p (PF3D7 0208900)	0.2606
Brazil vs Ecuador	2	501972	A	G	0.966942	PF3D7 0212400 (PF3D7 0212400)	0.4526
Brazil vs Ecuador	2	511004	G	A	1	PF3D7 0212500 (PF3D7 0212500)	0.3949
Brazil vs Ecuador	2	623146	T	C	0.966387	PF3D7 0215100 (PF3D7 0215100)	0.4705
Brazil vs Ecuador	2	784786	T	C	0.817534	GEXP20 (PF3D7 0219700)	0.2838
Brazil vs Ecuador	2	800017	G	A	1	LSA3 (PF3D7 0220000)	0.3502
Brazil vs Ecuador	2	840960	C	T	0.966942	CLAG2 (PF3D7 0220800)	0.3275
Brazil vs Ecuador	2	840984	G	A	0.966942	CLAG2 (PF3D7 0220800)	0.3275
Brazil vs Ecuador	2	841017	C	A	0.966387	CLAG2 (PF3D7 0220800)	0.3262
Brazil vs Ecuador	3	122810	A	G	0.96	CLAG3.2 (PF3D7 0302200)	0.4943
Brazil vs Ecuador	3	123737	C	A	0.898305	CLAG3.2 (PF3D7 0302200)	0.141
Brazil vs Ecuador	3	136866	T	C	0.777778	CLAG3.1 (PF3D7 0302500)	0.3569
Brazil vs Ecuador	3	354502	C	T	0.851215	PF3D7 0308000 (PF3D7 0308000)	0.05498
Brazil vs Ecuador	3	849476	C	T	0.891892	Cap380 (PF3D7 0320400)	0.2944
Brazil vs Ecuador	3	888900	C	A	0.894741	ALG7 (PF3D7 0321200)	0.2775
Brazil vs Ecuador	3	890846	C	T	1	PF3D7 0321300 (PF3D7 0321300)	0.03884
Brazil vs Ecuador	3	951306	A	G	0.838875	PF3D7 0322600 (PF3D7 0322600)	0.3559
Brazil vs Ecuador	4	140703	C	T	0.886792	RH1 (PF3D7 0402300)	0.3297
Brazil vs Ecuador	4	211638	T	A	0.822592	PF3D7 0403800 ()	0.3813
Brazil vs Ecuador	4	236244	C	T	0.878261	PF3D7 0404300 (PF3D7 0404300)	0.09705
Brazil vs Ecuador	4	415698	A	G	0.792452	SIAP1 (PF3D7 0408600)	0.1313
Brazil vs Ecuador	4	420049	A	C	0.77454	PLP1 (PF3D7 0408700)	0.3482
Brazil vs Ecuador	4	677644	A	G	1	PF3D7 0415200 (PF3D7 0415200)	0.115
Brazil vs Ecuador	4	683072	A	G	0.904897	CRK3 (PF3D7 0415300)	0.3763
Brazil vs Ecuador	4	683888	G	A	0.960784	CRK3 (PF3D7 0415300)	0.1523
Brazil vs Ecuador	4	691961	C	T	0.864407	PF3D7 0415700 (PF3D7 0415700)	0.2948
Brazil vs Ecuador	4	748239	A	T	0.894112	DHFR-TS (PF3D7 0417200)	0.21
Brazil vs Ecuador	4	748410	G	A	0.816828	DHFR-TS (PF3D7 0417200)	0.07098
Brazil vs Ecuador	4	763069	A	C	0.812109	PF3D7 0417400 (PF3D7 0417400)	0.2076
Brazil vs Ecuador	4	767099	T	G	0.854545	PF3D7 0417400 (PF3D7 0417400)	0.4823
Brazil vs Ecuador	4	839310	A	G	0.982456	PF3D7 0418600 (PF3D7 0418600)	0.2204
Brazil vs Ecuador	4	863561	C	T	0.890909	PF3D7 0419400 (PF3D7 0419400)	0.4831
Brazil vs Ecuador	4	908347	T	A	0.888861	RIO2 (PF3D7 0420100)	0.3061
Brazil vs Ecuador	4	988645	T	G	0.894737	PF3D7 0421700 (PF3D7 0421700)	0.399
Brazil vs Ecuador	4	989342	C	T	0.854195	PF3D7 0421700 (PF3D7 0421700)	0.1328
Brazil vs Ecuador	4	993272	C	T	0.886792	PF3D7 0421700 (PF3D7 0421700)	0.4373
Brazil vs Ecuador	4	993362	T	C	0.849057	PF3D7 0421700 (PF3D7 0421700)	0.4582
Brazil vs Ecuador	4	1006284	A	T	0.89221	PF3D7 0422200 (PF3D7 0422200)	0.4208
Brazil vs Ecuador	4	1034437	A	T	0.966942	BRR2 (PF3D7 0422500)	0.1607
Brazil vs Ecuador	4	1037656	A	T	0.867769	BRR2 (PF3D7 0422500)	0.4858
Brazil vs Ecuador	4	1100318	A	G	0.920792	SURF4.2 (PF3D7 0424400)	0.4718
Brazil vs Ecuador	4	1100954	A	G	1	SURF4.2 (PF3D7 0424400)	0.4168
Brazil vs Ecuador	4	1101956	T	A	0.814396	SURF4.2 (PF3D7 0424400)	0.4092
Brazil vs Ecuador	4	1102060	A	G	0.946903	SURF4.2 (PF3D7 0424400)	0.3275
Brazil vs Ecuador	4	1121457	C	G	0.830508	FIKK4.2 (PF3D7 0424700)	0.1356
Brazil vs Ecuador	4	1121472	T	A	0.830508	FIKK4.2 (PF3D7 0424700)	0.1255
Brazil vs Ecuador	4	1122147	A	C	0.830508	FIKK4.2 (PF3D7 0424700)	0.1593
Brazil vs Ecuador	5	269459	T	G	0.966102	PF3D7 0506500 (PF3D7 0506500)	0.3725
Brazil vs Ecuador	5	329493	T	G	0.8705	P38 (PF3D7 0508000)	0.4833
Brazil vs Ecuador	5	391061	C	T	0.857098	RNAPI (PF3D7 0509400)	0.2032
Brazil vs Ecuador	5	474904	G	A	0.880342	PF3D7 0511300 (PF3D7 0511300)	0.2766
Brazil vs Ecuador	5	475055	C	T	0.880342	PF3D7 0511300 (PF3D7 0511300)	0.287
Brazil vs Ecuador	5	550976	G	C	0.97479	PF3D7 0512800 (PF3D7 0512800)	0.3286
Brazil vs Ecuador	5	672685	T	C	0.790973	ATPase1 (PF3D7 0516100)	0.1218
Brazil vs Ecuador	5	706173	T	A	0.933884	ApiAP2 (PF3D7 0516800)	0.1881
Brazil vs Ecuador	5	901719	G	T	0.822592	TAF10 (PF3D7 0522200)	0.01777
Brazil vs Ecuador	5	929884	A	G	0.906977	PF3D7 0522400 (PF3D7 0522400)	0.2951
Brazil vs Ecuador	5	930435	C	T	0.822222	PF3D7 0522400 (PF3D7 0522400)	0.4172
Brazil vs Ecuador	5	949158	A	G	0.890909	PF3D7 0522900 (PF3D7 0522900)	0.2287
Brazil vs Ecuador	5	966314	C	A	1	PF3D7 0523200 (PF3D7 0523200)	0.163
Brazil vs Ecuador	5	1105159	T	G	1	PF3D7 0526600 (PF3D7 0526600)	0.2587
Brazil vs Ecuador	5	1185083	G	A	0.883892	PF3D7 0528900 ()	0.3887
Brazil vs Ecuador	5	1187921	A	G	0.887526	PF3D7 0529000 (PF3D7 0529000)	0.2709
Brazil vs Ecuador	5	1217961	G	A	0.924578	PF3D7 0529800 (PF3D7 0529800)	0.3481
Brazil vs Ecuador	5	1237394	T	A	0.786541	PF3D7 0530300 (PF3D7 0530300)	0.2028
Brazil vs Ecuador	5	1303719	C	A	0.777778	PF3D7 0532200 (PF3D7 0532200)	0.05594
Brazil vs Ecuador	5	1316719	T	A	0.777778	PF3D7 0532500 (PF3D7 0532500)	0.1612
Brazil vs Ecuador	6	182965	T	C	0.762712	PF3D7 0604300 (PF3D7 0604300)	0.3279
Brazil vs Ecuador	6	261661	A	G	0.786541	PF3D7 0606200 (PF3D7 0606200)	0.4137
Brazil vs Ecuador	6	304643	C	T	0.782637	UROD (PF3D7 0607300)	0.2082
Brazil vs Ecuador	6	377297	A	T	0.766155	PF3D7 0609000 (PF3D7 0609000)	0.2065
Brazil vs Ecuador	6	378828	G	A	0.923473	PF3D7 0609000 (PF3D7 0609000)	0.2849
Brazil vs Ecuador	6	387083	A	G	0.89221	PF3D7 0609000 (PF3D7 0609000)	0.4691
Brazil vs Ecuador	6	389754	A	G	0.932203	PF3D7 0609100 (PF3D7 0609100)	0.4064
Brazil vs Ecuador	6	404679	T	A	0.966387	PF3D7 0609500 (PF3D7 0609500)	0.4538
Brazil vs Ecuador	6	482969	G	A	1	PF3D7 0611500 (PF3D7 0611500)	0.1406
Brazil vs Ecuador	6	510595	C	T	0.966942	EIF3L (PF3D7 0612100)	0.3884
Brazil vs Ecuador	6	528066	T	A	0.932203	P12p (PF3D7 0612800)	0.3696
Brazil vs Ecuador	6	531935	G	A	0.966387	PF3D7 0612900 (PF3D7 0612900)	0.4488
Brazil vs Ecuador	6	575829	A	G	0.966942	ApiAP2 (PF3D7 0613800)	0.4066
Brazil vs Ecuador	6	578202	A	G	0.966942	ApiAP2 (PF3D7 0613800)	0.259
Brazil vs Ecuador	6	683064	A	T	0.812109	PF3D7 0616400 (PF3D7 0616400)	0.2524
Brazil vs Ecuador	6	690352	A	G	0.858659	PF3D7 0616600 (PF3D7 0616600)	0.3526
Brazil vs Ecuador	6	834400	G	A	0.877551	PF3D7 0619800 (PF3D7 0619800)	0.4618
Brazil vs Ecuador	6	834448	T	A	0.811321	PF3D7 0619800 (PF3D7 0619800)	0.463
Brazil vs Ecuador	6	851736	C	T	0.830508	MSP10 (PF3D7 0620400)	0.4696
Brazil vs Ecuador	6	851979	A	G	1	MSP10 (PF3D7 0620400)	0.3484
Brazil vs Ecuador	6	1011446	A	T	0.966942	PF3D7 0624800 (PF3D7 0624800)	0.03298
Brazil vs Ecuador	6	1111541	C	T	1	PF3D7 0627700 (PF3D7 0627700)	0.3828
Brazil vs Ecuador	6	1114587	A	T	0.965812	ACS (PF3D7 0627800)	0.3773
Brazil vs Ecuador	6	1135810	C	T	0.965812	PF3D7 0628100 (PF3D7 0628100)	0.4275
Brazil vs Ecuador	6	1141114	G	A	0.964602	PF3D7 0628100 (PF3D7 0628100)	0.346
Brazil vs Ecuador	6	1215233	G	A	1	PF3D7 0629500 (PF3D7 0629500)	0.4207
Brazil vs Ecuador	6	1241113	G	A	1	SET1 (PF3D7 0629700)	0.4841
Brazil vs Ecuador	6	1256674	A	G	1	PF3D7 0630100 (PF3D7 0630100)	0.4042
Brazil vs Ecuador	6	1266213	T	A	0.966387	PF3D7 0630300 (PF3D7 0630300)	0.07475
Brazil vs Ecuador	6	1266308	A	T	0.950413	PF3D7 0630300 (PF3D7 0630300)	0.1046
Brazil vs Ecuador	6	1282493	A	G	0.966942	PF3D7 0630600 (PF3D7 0630600)	0.3949
Brazil vs Ecuador	6	1286801	A	G	1	PF3D7 0630700 (PF3D7 0630700)	0.3004
Brazil vs Ecuador	6	1286845	G	T	1	PF3D7 0630700 (PF3D7 0630700)	0.3639
Brazil vs Ecuador	7	81937	G	T	0.795253	PF3D7 0701900 (PF3D7 0701900)	0.3783
Brazil vs Ecuador	7	81963	A	T	0.856809	PF3D7 0701900 (PF3D7 0701900)	0.3886
Brazil vs Ecuador	7	82122	C	T	0.798515	PF3D7 0701900 (PF3D7 0701900)	0.3463
Brazil vs Ecuador	7	150143	C	T	0.960784	PF3D7 0703800 (PF3D7 0703800)	0.4144
Brazil vs Ecuador	7	159875	T	A	0.927273	PF3D7 0703900 (PF3D7 0703900)	0.3083
Brazil vs Ecuador	7	160759	T	C	0.966942	PF3D7 0703900 (PF3D7 0703900)	0.4773
Brazil vs Ecuador	7	225194	T	C	0.966387	UT (PF3D7 0704600)	0.2646
Brazil vs Ecuador	7	257972	A	G	0.786541	PF3D7 0705200 (PF3D7 0705200)	0.1461
Brazil vs Ecuador	7	298978	G	T	0.805558	PF3D7 0706100 (PF3D7 0706100)	0.08247
Brazil vs Ecuador	7	375339	A	G	0.927273	PF3D7 0708200 (PF3D7 0708200)	0.3444
Brazil vs Ecuador	7	375818	T	C	0.89221	PF3D7 0708200 (PF3D7 0708200)	0.1871
Brazil vs Ecuador	7	378669	G	A	1	BUD32 (PF3D7 0708300)	0.2633
Brazil vs Ecuador	7	383527	T	C	1	HSP90 ()	0.1849
Brazil vs Ecuador	7	397135	T	C	0.982906	HSP110c (PF3D7 0708800)	0.06523
Brazil vs Ecuador	7	403337	G	T	1	CRT ()	0.3022
Brazil vs Ecuador	7	406231	C	T	0.965812	CRT ()	0.4237
Brazil vs Ecuador	7	415137	C	T	0.966387	CG2 (PF3D7 0709300)	0.1794
Brazil vs Ecuador	7	415245	G	A	0.966387	CG2 (PF3D7 0709300)	0.1559
Brazil vs Ecuador	7	415250	T	C	0.966387	CG2 (PF3D7 0709300)	0.1563
Brazil vs Ecuador	7	419410	G	A	1	CG2 (PF3D7 0709300)	0.3449
Brazil vs Ecuador	7	419413	A	G	1	CG2 (PF3D7 0709300)	0.3458
Brazil vs Ecuador	7	419603	T	A	1	CG2 (PF3D7 0709300)	0.299
Brazil vs Ecuador	7	433519	A	T	0.966942	POP1 (PF3D7 0709600)	0.08528
Brazil vs Ecuador	7	433609	A	T	0.966942	POP1 (PF3D7 0709600)	0.119
Brazil vs Ecuador	7	445215	A	G	1	PF3D7 0709900 (PF3D7 0709900)	0.4727
Brazil vs Ecuador	7	449571	G	A	0.966387	PF3D7 0710000 (PF3D7 0710000)	0.3779
Brazil vs Ecuador	7	450016	A	G	1	PF3D7 0710000 (PF3D7 0710000)	0.4157
Brazil vs Ecuador	7	450032	A	G	1	PF3D7 0710000 (PF3D7 0710000)	0.3907
Brazil vs Ecuador	7	450424	G	T	1	PF3D7 0710000 (PF3D7 0710000)	0.3217
Brazil vs Ecuador	7	451126	T	C	0.965812	PF3D7 0710000 (PF3D7 0710000)	0.3602
Brazil vs Ecuador	7	451640	T	G	1	PF3D7 0710000 (PF3D7 0710000)	0.2668
Brazil vs Ecuador	7	455494	A	G	1	PF3D7 0710000 (PF3D7 0710000)	0.3525
Brazil vs Ecuador	7	455550	T	A	1	PF3D7 0710000 (PF3D7 0710000)	0.3431
Brazil vs Ecuador	7	457005	G	A	1	PF3D7 0710000 (PF3D7 0710000)	0.4884
Brazil vs Ecuador	7	466431	A	T	1	PF3D7 0710200 (PF3D7 0710200)	0.4127
Brazil vs Ecuador	7	473039	A	T	0.983471	PF3D7 0710300 ()	0.1983
Brazil vs Ecuador	7	473203	G	A	0.983471	PF3D7 0710300 (PF3D7 0710300)	0.1905
Brazil vs Ecuador	7	473334	A	T	0.983471	PF3D7 0710300 ()	0.155
Brazil vs Ecuador	7	473404	T	A	0.983471	PF3D7 0710300 ()	0.1673
Brazil vs Ecuador	7	474754	A	G	0.983471	RAD14 (PF3D7 0710400)	0.1999
Brazil vs Ecuador	7	475135	A	G	0.966942	RAD14 (PF3D7 0710400)	0.2358
Brazil vs Ecuador	7	475576	T	A	0.950413	RAD14 (PF3D7 0710400)	0.4242
Brazil vs Ecuador	7	495855	C	T	0.958678	PF3D7 0711200 (PF3D7 0711200)	0.4917
Brazil vs Ecuador	7	602349	G	A	0.961165	RIF ()	0.05541
Brazil vs Ecuador	7	614408	A	T	0.760684	PF3D7 0713500 (PF3D7 0713500)	0.1843
Brazil vs Ecuador	7	622939	G	A	0.966942	PF3D7 0713700 ()	0.0912
Brazil vs Ecuador	7	700840	C	T	0.966942	PF3D7 0715900 (PF3D7 0715900)	0.06115
Brazil vs Ecuador	7	706335	T	C	0.894741	PF3D7 0716000 (PF3D7 0716000)	0.187
Brazil vs Ecuador	7	717434	A	G	1	PF3D7 0716300 (PF3D7 0716300)	0.4198
Brazil vs Ecuador	7	732865	G	A	0.830508	EIF3I (PF3D7 0716800)	0.3361
Brazil vs Ecuador	7	866181	A	G	0.982301	PF3D7 0719900 (PF3D7 0719900)	0.09178
Brazil vs Ecuador	7	905648	G	A	0.812109	PF3D7 0721000 (PF3D7 0721000)	0.1481
Brazil vs Ecuador	7	1115805	A	C	0.950413	PF3D7 0726400 (PF3D7 0726400)	0.4775
Brazil vs Ecuador	7	1149505	C	T	1	VPS53 (PF3D7 0727000)	0.3538
Brazil vs Ecuador	7	1196326	A	T	0.966942	PF3D7 0728100 (PF3D7 0728100)	0.2028
Brazil vs Ecuador	7	1361353	G	A	0.767453	EBA175 (PF3D7 0731500)	0.2605
Brazil vs Ecuador	8	70650	C	T	0.83871	SURF8.3 (PF3D7 0800700)	0.4826
Brazil vs Ecuador	8	70687	G	A	0.827957	SURF8.3 (PF3D7 0800700)	0.4915
Brazil vs Ecuador	8	229173	C	A	0.858659	PF3D7 0803600 (PF3D7 0803600)	0.2545
Brazil vs Ecuador	8	340367	T	G	0.7858	PF3D7 0806300 (PF3D7 0806300)	0.06227
Brazil vs Ecuador	8	406895	A	C	1	PF3D7 0808000 (PF3D7 0808000)	0.4519
Brazil vs Ecuador	8	414371	A	G	0.796941	PF3D7 0808100 ()	0.4911
Brazil vs Ecuador	8	416605	A	G	0.763572	PF3D7 0808200 (PF3D7 0808200)	0.2722
Brazil vs Ecuador	8	423537	C	T	1	SEC28 (PF3D7 0808400)	0.3078
Brazil vs Ecuador	8	486900	G	A	0.858659	PF3D7 0809600 (PF3D7 0809600)	0.2492
Brazil vs Ecuador	8	492502	T	A	0.932203	PF3D7 0809600 (PF3D7 0809600)	0.2773
Brazil vs Ecuador	8	505739	A	G	1	PF3D7 0809800 (PF3D7 0809800)	0.2991
Brazil vs Ecuador	8	580045	G	A	0.802505	CARM1 (PF3D7 0811500)	0.09367
Brazil vs Ecuador	8	612596	C	A	0.966387	PF3D7 0812100 (PF3D7 0812100)	0.4925
Brazil vs Ecuador	8	619138	A	G	0.849057	SSP3 (PF3D7 0812300)	0.454
Brazil vs Ecuador	8	712741	T	C	0.850793	PF3D7 0815100 (PF3D7 0815100)	0.269
Brazil vs Ecuador	8	712742	A	G	0.850793	PF3D7 0815100 (PF3D7 0815100)	0.2691
Brazil vs Ecuador	8	752747	A	G	0.965217	PF3D7 0816300 (PF3D7 0816300)	0.1372
Brazil vs Ecuador	8	845787	T	A	1	PBLP (PF3D7 0818600)	0.2441
Brazil vs Ecuador	8	846225	G	T	1	PBLP (PF3D7 0818600)	0.4252
Brazil vs Ecuador	8	882476	A	G	1	PF3D7 0819500 ()	0.09139
Brazil vs Ecuador	8	1005851	G	C	0.963964	PF3D7 0822800 (PF3D7 0822800)	0.4911
Brazil vs Ecuador	8	1099848	G	A	0.786541	KRI1 (PF3D7 0825500)	0.2168
Brazil vs Ecuador	8	1326135	C	T	1	SURF8.1 ()	0.4741
Brazil vs Ecuador	8	1326242	A	G	0.888677	SURF8.1 (PF3D7 0831100)	0.4751
Brazil vs Ecuador	8	1326258	G	T	0.888677	SURF8.1 (PF3D7 0831100)	0.4731
Brazil vs Ecuador	8	1326270	T	A	0.891193	SURF8.1 (PF3D7 0831100)	0.4922
Brazil vs Ecuador	8	1383640	A	G	0.929825	PF3D7 0832000 (PF3D7 0832000)	0.2105
Brazil vs Ecuador	9	127644	G	A	0.822592	PF3D7 0902900 (PF3D7 0902900)	0.3612
Brazil vs Ecuador	9	231065	C	A	0.955556	CuTP (PF3D7 0904900)	0.2482
Brazil vs Ecuador	9	283868	A	G	0.762712	WDR66 (PF3D7 0905600)	0.4969
Brazil vs Ecuador	9	290324	G	A	0.89221	PF3D7 0905800 (PF3D7 0905800)	0.4712
Brazil vs Ecuador	9	597897	A	G	0.926751	PF3D7 0914000 (PF3D7 0914000)	0.4984
Brazil vs Ecuador	9	850295	T	A	0.864407	PF3D7 0920700 (PF3D7 0920700)	0.337
Brazil vs Ecuador	9	963651	C	T	0.963636	TRXR (PF3D7 0923800)	0.3863
Brazil vs Ecuador	9	1112623	A	G	0.929825	PF3D7 0927200 (PF3D7 0927200)	0.3887
Brazil vs Ecuador	9	1179228	G	A	0.932773	RhopH2 (PF3D7 0929400)	0.374
Brazil vs Ecuador	9	1179855	A	C	1	RhopH2 (PF3D7 0929400)	0.3811
Brazil vs Ecuador	9	1203387	A	G	0.932773	MSP1 (PF3D7 0930300)	0.4777
Brazil vs Ecuador	10	113265	T	C	1	PArt (PF3D7 1002200)	0.4326
Brazil vs Ecuador	10	218859	C	T	1	PF3D7 1004600 (PF3D7 1004600)	0.4182
Brazil vs Ecuador	10	224776	C	A	0.865546	PF3D7 1004900 (PF3D7 1004900)	0.2137
Brazil vs Ecuador	10	399698	C	T	0.85124	PF3D7 1009900 (PF3D7 1009900)	0.3837
Brazil vs Ecuador	10	558456	C	A	0.943899	PF3D7 1014100 (PF3D7 1014100)	0.2466
Brazil vs Ecuador	10	558458	T	G	0.943899	PF3D7 1014100 (PF3D7 1014100)	0.4827
Brazil vs Ecuador	10	663646	T	C	0.981982	PF3D7 1016500 (PF3D7 1016500)	0.1059
Brazil vs Ecuador	10	817457	C	T	0.849057	PF3D7 1020200 (PF3D7 1020200)	0.2634
Brazil vs Ecuador	10	1389266	C	T	0.853423	PF3D7 1035000 (PF3D7 1035000)	0.3889
Brazil vs Ecuador	10	1391523	G	T	0.822835	PF3D7 1035100 (PF3D7 1035100)	0.2134
Brazil vs Ecuador	10	1391602	A	C	0.879995	PF3D7 1035100 (PF3D7 1035100)	0.0782
Brazil vs Ecuador	10	1394950	G	A	0.783784	PF3D7 1035200 (PF3D7 1035200)	0.2483
Brazil vs Ecuador	10	1414244	G	A	0.840455	DBLMSP (PF3D7 1035700)	0.3863
Brazil vs Ecuador	10	1414253	A	G	0.840455	DBLMSP (PF3D7 1035700)	0.3884
Brazil vs Ecuador	10	1414265	A	G	0.840455	DBLMSP (PF3D7 1035700)	0.3891
Brazil vs Ecuador	10	1414274	T	A	0.840455	DBLMSP (PF3D7 1035700)	0.388
Brazil vs Ecuador	10	1414286	G	A	0.840455	DBLMSP (PF3D7 1035700)	0.3856
Brazil vs Ecuador	10	1414332	A	G	0.840455	DBLMSP (PF3D7 1035700)	0.4123
Brazil vs Ecuador	10	1414333	A	T	0.840455	DBLMSP (PF3D7 1035700)	0.4126
Brazil vs Ecuador	10	1414440	T	G	0.856099	DBLMSP (PF3D7 1035700)	0.3586
Brazil vs Ecuador	10	1414452	A	T	0.83783	DBLMSP (PF3D7 1035700)	0.359
Brazil vs Ecuador	10	1414537	A	G	0.83783	DBLMSP (PF3D7 1035700)	0.3034
Brazil vs Ecuador	10	1433217	T	G	1	DBLMSP2 (PF3D7 1036300)	0.4152
Brazil vs Ecuador	10	1433484	G	A	1	DBLMSP2 (PF3D7 1036300)	0.4988
Brazil vs Ecuador	10	1433493	C	T	1	DBLMSP2 (PF3D7 1036300)	0.4957
Brazil vs Ecuador	10	1433514	C	T	1	DBLMSP2 (PF3D7 1036300)	0.4808
Brazil vs Ecuador	10	1433547	C	T	1	DBLMSP2 (PF3D7 1036300)	0.4184
Brazil vs Ecuador	10	1449646	G	A	0.966942	PF3D7 1036800 (PF3D7 1036800)	0.1156
Brazil vs Ecuador	11	119553	T	A	0.882353	GEXP02 (PF3D7 1102500)	0.4905
Brazil vs Ecuador	11	307361	G	A	0.898305	PAIP1 (PF3D7 1107300)	0.1506
Brazil vs Ecuador	11	360271	C	T	1	PF3D7 1108100 ()	0.1881
Brazil vs Ecuador	11	408668	T	A	0.857069	PRPF6 (PF3D7 1110200)	0.3826
Brazil vs Ecuador	11	410739	A	G	0.950413	PF3D7 1110300 ()	0.2113
Brazil vs Ecuador	11	466252	T	A	0.921023	PF3D7 1112100 (PF3D7 1112100)	0.1948
Brazil vs Ecuador	11	638299	T	G	0.966942	HSP101 (PF3D7 1116800)	0.4931
Brazil vs Ecuador	11	1243999	T	C	0.966942	PF3D7 1132100 (PF3D7 1132100)	0.465
Brazil vs Ecuador	11	1275658	T	A	0.850727	PF3D7 1133000 (PF3D7 1133000)	0.2924
Brazil vs Ecuador	11	1294414	G	A	0.875679	AMA1 (PF3D7 1133400)	0.4416
Brazil vs Ecuador	11	1294471	A	G	0.881439	AMA1 (PF3D7 1133400)	0.2717
Brazil vs Ecuador	11	1294529	T	A	0.852323	AMA1 (PF3D7 1133400)	0.3872
Brazil vs Ecuador	11	1295343	G	T	0.863418	AMA1 (PF3D7 1133400)	0.4915
Brazil vs Ecuador	11	1295363	G	A	0.862426	AMA1 (PF3D7 1133400)	0.4818
Brazil vs Ecuador	11	1507877	C	T	1	GCalpha (PF3D7 1138400)	0.4567
Brazil vs Ecuador	11	1640555	T	C	0.933884	PF3D7 1140900 (PF3D7 1140900)	0.3559
Brazil vs Ecuador	11	1815412	C	G	0.966942	PF3D7 1145800 (PF3D7 1145800)	0.4349
Brazil vs Ecuador	12	49704	A	T	0.981651	VAR2CSA (PF3D7 1200600)	0.1717
Brazil vs Ecuador	12	49879	A	C	1	VAR2CSA (PF3D7 1200600)	0.3719
Brazil vs Ecuador	12	49887	G	T	1	VAR2CSA (PF3D7 1200600)	0.3684
Brazil vs Ecuador	12	49892	T	A	1	VAR2CSA (PF3D7 1200600)	0.3633
Brazil vs Ecuador	12	50212	A	T	0.981308	VAR2CSA (PF3D7 1200600)	0.3914
Brazil vs Ecuador	12	50435	T	G	1	VAR2CSA (PF3D7 1200600)	0.2565
Brazil vs Ecuador	12	50686	C	T	0.85652	VAR2CSA (PF3D7 1200600)	0.4657
Brazil vs Ecuador	12	50785	C	T	0.811745	VAR2CSA (PF3D7 1200600)	0.485
Brazil vs Ecuador	12	50790	G	C	0.816921	VAR2CSA (PF3D7 1200600)	0.4854
Brazil vs Ecuador	12	50791	T	C	0.822475	VAR2CSA (PF3D7 1200600)	0.4854
Brazil vs Ecuador	12	50842	G	A	0.806898	VAR2CSA (PF3D7 1200600)	0.1878
Brazil vs Ecuador	12	51313	G	A	0.814576	VAR2CSA (PF3D7 1200600)	0.441
Brazil vs Ecuador	12	51329	T	C	0.913043	VAR2CSA (PF3D7 1200600)	0.3054
Brazil vs Ecuador	12	51361	A	T	0.81682	VAR2CSA (PF3D7 1200600)	0.4212
Brazil vs Ecuador	12	51870	G	T	0.834159	VAR2CSA (PF3D7 1200600)	0.4966
Brazil vs Ecuador	12	52903	C	T	1	VAR2CSA (PF3D7 1200600)	0.3504
Brazil vs Ecuador	12	52935	T	G	1	VAR2CSA (PF3D7 1200600)	0.1835
Brazil vs Ecuador	12	53128	A	G	0.858078	VAR2CSA (PF3D7 1200600)	0.4187
Brazil vs Ecuador	12	53139	G	A	0.857588	VAR2CSA (PF3D7 1200600)	0.2941
Brazil vs Ecuador	12	53286	C	T	0.974026	VAR2CSA (PF3D7 1200600)	0.3415
Brazil vs Ecuador	12	53643	A	G	1	VAR2CSA (PF3D7 1200600)	0.4818
Brazil vs Ecuador	12	53744	G	A	0.977528	VAR2CSA (PF3D7 1200600)	0.3619
Brazil vs Ecuador	12	53921	T	G	0.978495	VAR2CSA (PF3D7 1200600)	0.4348
Brazil vs Ecuador	12	54106	T	A	0.8	VAR2CSA (PF3D7 1200600)	0.4461
Brazil vs Ecuador	12	54112	G	T	0.8	VAR2CSA (PF3D7 1200600)	0.434
Brazil vs Ecuador	12	55374	C	T	0.826087	VAR2CSA (PF3D7 1200600)	0.4778
Brazil vs Ecuador	12	55376	C	T	0.76	VAR2CSA (PF3D7 1200600)	0.479
Brazil vs Ecuador	12	56041	A	G	0.870968	VAR2CSA (PF3D7 1200600)	0.4411
Brazil vs Ecuador	12	63393	G	A	0.982906	ACS7 (PF3D7 1200700)	0.1907
Brazil vs Ecuador	12	95482	A	G	0.841695	PF3D7 1201400 (PF3D7 1201400)	0.377
Brazil vs Ecuador	12	95517	A	T	0.83659	PF3D7 1201400 (PF3D7 1201400)	0.3815
Brazil vs Ecuador	12	95548	T	C	0.83659	PF3D7 1201400 (PF3D7 1201400)	0.3961
Brazil vs Ecuador	12	550805	T	C	0.894741	PF3D7 1212400 (PF3D7 1212400)	0.1371
Brazil vs Ecuador	12	642179	T	C	0.786541	SR10 (PF3D7 1215900)	0.04208
Brazil vs Ecuador	12	659788	G	A	0.964602	CelTOS (PF3D7 1216600)	0.3674
Brazil vs Ecuador	12	701956	C	T	0.769894	PF3D7 1217900 (PF3D7 1217900)	0.2151
Brazil vs Ecuador	12	760468	T	A	0.966942	PF3D7 1219100 (PF3D7 1219100)	0.3643
Brazil vs Ecuador	12	836994	T	C	0.773585	SET10 (PF3D7 1221000)	0.3953
Brazil vs Ecuador	12	1114059	T	C	0.966942	CYC2 (PF3D7 1227500)	0.4993
Brazil vs Ecuador	12	1184925	A	G	0.92963	PF3D7 1228900 (PF3D7 1228900)	0.317
Brazil vs Ecuador	12	1194636	A	T	0.950413	MRP2 (PF3D7 1229100)	0.2522
Brazil vs Ecuador	12	1542404	C	A	0.854864	PF3D7 1237100 (PF3D7 1237100)	0.05956
Brazil vs Ecuador	12	1552084	T	C	0.889495	PF3D7 1237200 (PF3D7 1237200)	0.07051
Brazil vs Ecuador	12	1559859	T	A	0.812109	PF3D7 1237400 (PF3D7 1237400)	0.1621
Brazil vs Ecuador	12	1834460	G	A	0.866667	DOC2 ()	0.4341
Brazil vs Ecuador	12	1839613	T	G	0.898305	DOC2 (PF3D7 1243900)	0.4349
Brazil vs Ecuador	12	1934745	G	A	0.930243	PF3D7 1246500 (PF3D7 1246500)	0.3814
Brazil vs Ecuador	12	2048777	A	G	0.756522	G377 (PF3D7 1250100)	0.182
Brazil vs Ecuador	12	2100046	A	T	0.786541	PF3D7 1251500 (PF3D7 1251500)	0.1289
Brazil vs Ecuador	12	2151902	T	C	0.932203	PF3D7 1252600 (PF3D7 1252600)	0.4582
Brazil vs Ecuador	12	2171632	G	A	0.951807	PF3D7 1253100 (PF3D7 1253100)	0.4202
Brazil vs Ecuador	12	2171640	G	C	0.951807	PF3D7 1253100 (PF3D7 1253100)	0.4213
Brazil vs Ecuador	12	2171647	G	A	0.951807	PF3D7 1253100 (PF3D7 1253100)	0.4327
Brazil vs Ecuador	12	2171702	G	T	0.955056	PF3D7 1253100 (PF3D7 1253100)	0.436
Brazil vs Ecuador	12	2171863	T	C	0.895972	PF3D7 1253100 (PF3D7 1253100)	0.4696
Brazil vs Ecuador	12	2171901	T	A	0.894432	PF3D7 1253100 (PF3D7 1253100)	0.4922
Brazil vs Ecuador	13	92637	T	C	0.848739	EBA140 (PF3D7 1301600)	0.3686
Brazil vs Ecuador	13	266967	T	C	0.753877	PF3D7 1305300 (PF3D7 1305300)	0.2402
Brazil vs Ecuador	13	290146	T	C	0.770933	PF3D7 1306200 (PF3D7 1306200)	0.4311
Brazil vs Ecuador	13	366999	G	T	1	cpsSII (PF3D7 1308200)	0.1949
Brazil vs Ecuador	13	444696	C	A	0.89221	VPS18 (PF3D7 1309700)	0.1342
Brazil vs Ecuador	13	445694	C	T	1	PF3D7 1309800 (PF3D7 1309800)	0.2115
Brazil vs Ecuador	13	614769	T	A	0.966387	TERT (PF3D7 1314200)	0.1974
Brazil vs Ecuador	13	738765	A	T	0.858659	PF3D7 1317700 (PF3D7 1317700)	0.06471
Brazil vs Ecuador	13	743560	C	T	0.966942	PF3D7 1317900 (PF3D7 1317900)	0.29
Brazil vs Ecuador	13	944480	G	C	0.92957	PF3D7 1322300 (PF3D7 1322300)	0.3185
Brazil vs Ecuador	13	1147866	A	G	0.905488	PF3D7 1327300 (PF3D7 1327300)	0.3564
Brazil vs Ecuador	13	1228260	T	A	0.77948	MyoC (PF3D7 1329100)	0.0467
Brazil vs Ecuador	13	1228360	T	A	0.837848	MyoC (PF3D7 1329100)	0.0525
Brazil vs Ecuador	13	1228434	T	G	0.77948	MyoC (PF3D7 1329100)	0.05526
Brazil vs Ecuador	13	1228438	G	A	0.77948	MyoC (PF3D7 1329100)	0.0549
Brazil vs Ecuador	13	1299038	A	G	1	PF3D7 1331000 (PF3D7 1331000)	0.3776
Brazil vs Ecuador	13	1697887	T	C	0.966387	PMT (PF3D7 1343000)	0.4451
Brazil vs Ecuador	13	2179835	G	C	1	PF3D7 1354700 (PF3D7 1354700)	0.3946
Brazil vs Ecuador	13	2250736	A	G	1	ARK3 (PF3D7 1356800)	0.4845
Brazil vs Ecuador	13	2257919	C	A	0.966942	ARK3 (PF3D7 1356800)	0.0677
Brazil vs Ecuador	13	2266147	G	A	0.874764	PF3D7 1357000 (PF3D7 1357000)	0.3082
Brazil vs Ecuador	13	2266150	C	T	0.874764	PF3D7 1357000 (PF3D7 1357000)	0.3086
Brazil vs Ecuador	13	2266186	T	C	0.891892	PF3D7 1357000 (PF3D7 1357000)	0.3119
Brazil vs Ecuador	13	2408374	C	T	0.801755	EMC3 (PF3D7 1360200)	0.07644
Brazil vs Ecuador	13	2569646	A	C	0.889495	P92 (PF3D7 1364100)	0.2341
Brazil vs Ecuador	13	2824570	G	A	0.877551	PF3D7 1371800 (PF3D7 1371800)	0.318
Brazil vs Ecuador	13	2824624	C	T	0.877551	PF3D7 1371800 (PF3D7 1371800)	0.2665
Brazil vs Ecuador	14	107014	G	A	0.780222	PF3D7 1402900 (PF3D7 1402900)	0.3509
Brazil vs Ecuador	14	256529	G	C	0.83582	CCp3 (PF3D7 1407000)	0.482
Brazil vs Ecuador	14	478047	G	C	0.838875	PF3D7 1411800 (PF3D7 1411800)	0.2412
Brazil vs Ecuador	14	711335	G	A	0.874787	ATG4 (PF3D7 1417300)	0.4891
Brazil vs Ecuador	14	1106139	C	T	0.854864	PF3D7 1428300 (PF3D7 1428300)	0.3685
Brazil vs Ecuador	14	1124984	C	A	0.966942	PF3D7 1428500 (PF3D7 1428500)	0.3928
Brazil vs Ecuador	14	1393032	C	T	0.921569	PF3D7 1434500 (PF3D7 1434500)	0.4632
Brazil vs Ecuador	14	1405370	A	G	0.762712	METAP2 (PF3D7 1434600)	0.4363
Brazil vs Ecuador	14	1480458	A	T	0.900826	PTEX150 (PF3D7 1436300)	0.3671
Brazil vs Ecuador	14	1550691	T	A	0.786541	MCA2 (PF3D7 1438400)	0.2908
Brazil vs Ecuador	14	1710253	A	T	0.89916	PF3D7 1442200 (PF3D7 1442200)	0.1109
Brazil vs Ecuador	14	1770207	T	C	1	PF3D7 1443100 (PF3D7 1443100)	0.1937
Brazil vs Ecuador	14	1819017	T	C	0.842787	PF3D7 1444100 (PF3D7 1444100)	0.346
Brazil vs Ecuador	14	1854863	C	G	0.832194	PF3D7 1445100 (PF3D7 1445100)	0.2237
Brazil vs Ecuador	14	1993471	T	C	0.933884	PF3D7 1448500 (PF3D7 1448500)	0.4155
Brazil vs Ecuador	14	2060776	G	A	0.966942	PF3D7 1450400 (PF3D7 1450400)	0.4208
Brazil vs Ecuador	14	2185421	G	T	0.966942	PF3D7 1453200 (PF3D7 1453200)	0.3849
Brazil vs Ecuador	14	2536485	A	G	0.886575	PF3D7 1462400 (PF3D7 1462400)	0.3323
Brazil vs Ecuador	14	2695875	T	C	0.889495	PF3D7 1466200 (PF3D7 1466200)	0.4575
Brazil vs Ecuador	14	2733656	C	T	0.843137	PF3D7 1466800 (PF3D7 1466800)	0.4186
Brazil vs Ecuador	14	2755887	T	A	0.872304	PF3D7 1467500 (PF3D7 1467500)	0.3293
Brazil vs Ecuador	14	2763591	C	T	0.783784	PF3D7 1467600 (PF3D7 1467600)	0.4616
Brazil vs Ecuador	14	2792758	G	T	0.889495	PF3D7 1468100 (PF3D7 1468100)	0.2371
Brazil vs Ecuador	14	3017749	A	T	0.858659	PF3D7 1474000 (PF3D7 1474000)	0.3595
Brazil vs Ecuador	14	3125480	G	A	0.934172	PF3D7 1475900 (PF3D7 1475900)	0.2055
Brazil vs Ecuador	14	3126183	T	C	0.945946	PF3D7 1475900 (PF3D7 1475900)	0.1439
Brazil vs French Guiana	1	114473	T	G	0.782063	EBA181 (PF3D7 0102500)	0.2865
Brazil vs French Guiana	1	499681	A	T	0.831902	SURF1.1 (PF3D7 0113100)	0.1452
Brazil vs French Guiana	1	499684	T	G	0.831902	SURF1.1 (PF3D7 0113100)	0.1569
Brazil vs French Guiana	3	122810	A	G	0.913043	CLAG3.2 (PF3D7 0302200)	0.4943
Brazil vs French Guiana	3	506849	A	T	0.758586	PF3D7 0311800 ()	0.4007
Brazil vs French Guiana	4	993272	C	T	0.818182	PF3D7 0421700 (PF3D7 0421700)	0.4373
Brazil vs French Guiana	5	1303719	C	A	0.777778	PF3D7 0532200 (PF3D7 0532200)	0.05594
Brazil vs French Guiana	5	1309680	C	T	0.777778	PF3D7 0532300 (PF3D7 0532300)	0.3259
Brazil vs French Guiana	5	1309681	A	G	0.777778	PF3D7 0532300 (PF3D7 0532300)	0.3259
Brazil vs French Guiana	5	1316719	T	A	0.777778	PF3D7 0532500 (PF3D7 0532500)	0.1612
Brazil vs French Guiana	6	119814	A	G	0.802505	PF3D7 0602900 (PF3D7 0602900)	0.1892
Brazil vs French Guiana	8	1383640	A	G	0.929825	PF3D7 0832000 (PF3D7 0832000)	0.2105
Brazil vs French Guiana	9	589646	C	T	0.847026	PF3D7 0913700 (PF3D7 0913700)	0.3975
Brazil vs French Guiana	9	589649	C	T	0.847026	PF3D7 0913700 (PF3D7 0913700)	0.3973
Brazil vs French Guiana	9	1179228	G	A	0.877584	RhopH2 (PF3D7 0929400)	0.374
Brazil vs French Guiana	9	1418612	G	C	0.78168	CLAG9 (PF3D7 0935800)	0.4878
Brazil vs French Guiana	10	222801	A	G	0.883948	PF3D7 1004800 ()	0.4395
Brazil vs French Guiana	10	222813	A	T	0.966387	PF3D7 1004800 ()	0.4422
Brazil vs French Guiana	10	224776	C	A	0.80091	PF3D7 1004900 (PF3D7 1004900)	0.2137
Brazil vs French Guiana	10	225629	G	A	0.761327	MRSapi (PF3D7 1005000)	0.4737
Brazil vs French Guiana	10	663646	T	C	0.902343	PF3D7 1016500 (PF3D7 1016500)	0.1059
Brazil vs French Guiana	10	669306	C	T	0.88275	PF3D7 1016700 (PF3D7 1016700)	0.2819
Brazil vs French Guiana	11	1294414	G	A	0.784531	AMA1 (PF3D7 1133400)	0.4416
Brazil vs French Guiana	11	1294471	A	G	0.773657	AMA1 (PF3D7 1133400)	0.2717
Brazil vs French Guiana	11	1294529	T	A	0.783769	AMA1 (PF3D7 1133400)	0.3872
Brazil vs French Guiana	12	49704	A	T	0.928524	VAR2CSA (PF3D7 1200600)	0.1717
Brazil vs French Guiana	12	50212	A	T	0.928146	VAR2CSA (PF3D7 1200600)	0.3914
Brazil vs French Guiana	12	50686	C	T	0.930348	VAR2CSA (PF3D7 1200600)	0.4657
Brazil vs French Guiana	12	51661	C	A	0.769195	VAR2CSA (PF3D7 1200600)	0.4088
Brazil vs French Guiana	12	53128	A	G	0.878856	VAR2CSA (PF3D7 1200600)	0.4187
Brazil vs French Guiana	12	53139	G	A	0.929084	VAR2CSA (PF3D7 1200600)	0.2941
Brazil vs French Guiana	12	53921	T	G	0.927657	VAR2CSA (PF3D7 1200600)	0.4348
Brazil vs French Guiana	12	1184925	A	G	0.80975	PF3D7 1228900 (PF3D7 1228900)	0.317
Brazil vs French Guiana	14	1912280	G	A	0.814922	PF3D7 1446500 (PF3D7 1446500)	0.3396
Brazil vs Guyana	1	499681	A	T	0.804594	SURF1.1 (PF3D7 0113100)	0.1452
Brazil vs Guyana	1	499684	T	G	0.803767	SURF1.1 (PF3D7 0113100)	0.1569
Brazil vs Guyana	2	339959	C	T	0.871683	PF3D7 0208300 (PF3D7 0208300)	0.2218
Brazil vs Guyana	5	474904	G	A	0.836075	PF3D7 0511300 (PF3D7 0511300)	0.2766
Brazil vs Guyana	5	475055	C	T	0.836942	PF3D7 0511300 (PF3D7 0511300)	0.287
Brazil vs Guyana	5	475188	C	A	0.840758	PF3D7 0511300 (PF3D7 0511300)	0.2614
Brazil vs Guyana	5	475346	T	A	0.838262	PF3D7 0511300 (PF3D7 0511300)	0.2003
Brazil vs Guyana	5	561244	G	T	0.759536	PF3D7 0513200 (PF3D7 0513200)	0.2825
Brazil vs Guyana	5	1303719	C	A	0.777778	PF3D7 0532200 (PF3D7 0532200)	0.05594
Brazil vs Guyana	5	1309680	C	T	0.777778	PF3D7 0532300 (PF3D7 0532300)	0.3259
Brazil vs Guyana	5	1309681	A	G	0.777778	PF3D7 0532300 (PF3D7 0532300)	0.3259
Brazil vs Guyana	5	1316719	T	A	0.777778	PF3D7 0532500 (PF3D7 0532500)	0.1612
Brazil vs Guyana	6	377297	A	T	0.830481	PF3D7 0609000 (PF3D7 0609000)	0.2065
Brazil vs Guyana	6	378828	G	A	0.810476	PF3D7 0609000 (PF3D7 0609000)	0.2849
Brazil vs Guyana	8	1383640	A	G	0.827199	PF3D7 0832000 (PF3D7 0832000)	0.2105
Brazil vs Guyana	9	114323	C	T	0.768421	FIKK9.7 (PF3D7 0902600)	0.4697
Brazil vs Guyana	9	381019	A	G	0.81946	PF3D7 0908200 (PF3D7 0908200)	0.1156
Brazil vs Guyana	9	1418612	G	C	0.771459	CLAG9 (PF3D7 0935800)	0.4878
Brazil vs Guyana	9	1436710	T	C	0.757431	REX3 (PF3D7 0936300)	0.2709
Brazil vs Guyana	10	222801	A	G	0.912213	PF3D7 1004800 ()	0.4395
Brazil vs Guyana	10	222813	A	T	0.929731	PF3D7 1004800 ()	0.4422
Brazil vs Guyana	10	224776	C	A	0.865546	PF3D7 1004900 (PF3D7 1004900)	0.2137
Brazil vs Guyana	10	225629	G	A	0.826446	MRSapi (PF3D7 1005000)	0.4737
Brazil vs Guyana	10	663646	T	C	0.952375	PF3D7 1016500 (PF3D7 1016500)	0.1059
Brazil vs Guyana	10	669306	C	T	0.952602	PF3D7 1016700 (PF3D7 1016700)	0.2819
Brazil vs Guyana	12	50785	C	T	0.770485	VAR2CSA (PF3D7 1200600)	0.485
Brazil vs Guyana	12	50790	G	C	0.769927	VAR2CSA (PF3D7 1200600)	0.4854
Brazil vs Guyana	12	50791	T	C	0.767973	VAR2CSA (PF3D7 1200600)	0.4854
Brazil vs Guyana	13	1147866	A	G	0.763978	PF3D7 1327300 (PF3D7 1327300)	0.3564
Brazil vs Guyana	14	47725	G	T	0.76817	PF3D7 1401200 (PF3D7 1401200)	0.1915
Brazil vs Guyana	14	256529	G	C	0.948	CCp3 (PF3D7 1407000)	0.482
Brazil vs Guyana	14	2060776	G	A	0.820281	PF3D7 1450400 (PF3D7 1450400)	0.4208
Brazil vs Zambia	1	495385	A	G	0.764244	SURF1.1 (PF3D7 0113100)	0.2478
Brazil vs Zambia	1	495388	A	G	0.762279	SURF1.1 (PF3D7 0113100)	0.2478
Brazil vs Zambia	1	499681	A	T	0.823213	SURF1.1 (PF3D7 0113100)	0.1452
Brazil vs Zambia	1	499684	T	G	0.825367	SURF1.1 (PF3D7 0113100)	0.1569
Brazil vs Zambia	1	543381	G	A	0.918164	EPF1 (PF3D7 0114000)	0.04504
Brazil vs Zambia	2	366771	G	A	0.897839	P230p (PF3D7 0208900)	0.2606
Brazil vs Zambia	2	511004	G	A	0.976238	PF3D7 0212500 (PF3D7 0212500)	0.3949
Brazil vs Zambia	2	623146	T	C	0.870009	PF3D7 0215100 (PF3D7 0215100)	0.4705
Brazil vs Zambia	3	622763	G	C	0.773726	CTRP (PF3D7 0315200)	0.4009
Brazil vs Zambia	3	849476	C	T	0.899804	Cap380 (PF3D7 0320400)	0.2944
Brazil vs Zambia	3	890846	C	T	0.978304	PF3D7 0321300 (PF3D7 0321300)	0.03884
Brazil vs Zambia	4	236244	C	T	0.765711	PF3D7 0404300 (PF3D7 0404300)	0.09705
Brazil vs Zambia	4	677644	A	G	0.97053	PF3D7 0415200 (PF3D7 0415200)	0.115
Brazil vs Zambia	4	683888	G	A	0.858546	CRK3 (PF3D7 0415300)	0.1523
Brazil vs Zambia	4	748262	T	C	0.929273	DHFR-TS (PF3D7 0417200)	0.1808
Brazil vs Zambia	4	988645	T	G	0.788955	PF3D7 0421700 (PF3D7 0421700)	0.399
Brazil vs Zambia	4	1121457	C	G	0.946955	FIKK4.2 (PF3D7 0424700)	0.1356
Brazil vs Zambia	4	1121472	T	A	1	FIKK4.2 (PF3D7 0424700)	0.1255
Brazil vs Zambia	5	269459	T	G	0.766208	PF3D7 0506500 (PF3D7 0506500)	0.3725
Brazil vs Zambia	5	949158	A	G	0.789784	PF3D7 0522900 (PF3D7 0522900)	0.2287
Brazil vs Zambia	5	966314	C	A	0.88998	PF3D7 0523200 (PF3D7 0523200)	0.163
Brazil vs Zambia	5	1043303	G	A	0.925344	ACS10 (PF3D7 0525100)	0.2836
Brazil vs Zambia	6	237194	T	G	0.750737	PF3D7 0605700 (PF3D7 0605700)	0.3677
Brazil vs Zambia	6	261661	A	G	0.75358	PF3D7 0606200 (PF3D7 0606200)	0.4137
Brazil vs Zambia	6	404679	T	A	0.873468	PF3D7 0609500 (PF3D7 0609500)	0.4538
Brazil vs Zambia	6	482969	G	A	0.872299	PF3D7 0611500 (PF3D7 0611500)	0.1406
Brazil vs Zambia	7	159875	T	A	0.768173	PF3D7 0703900 (PF3D7 0703900)	0.3083
Brazil vs Zambia	7	403625	A	C	0.966387	CRT (PF3D7 0709000)	0.3507
Brazil vs Zambia	7	404407	G	T	0.966387	CRT (PF3D7 0709000)	0.3652
Brazil vs Zambia	7	406231	C	T	0.825319	CRT ()	0.4237
Brazil vs Zambia	7	451640	T	G	0.794059	PF3D7 0710000 (PF3D7 0710000)	0.2668
Brazil vs Zambia	7	473039	A	T	0.753513	PF3D7 0710300 ()	0.1983
Brazil vs Zambia	7	473203	G	A	0.804933	PF3D7 0710300 (PF3D7 0710300)	0.1905
Brazil vs Zambia	7	473334	A	T	0.836812	PF3D7 0710300 ()	0.155
Brazil vs Zambia	7	473404	T	A	0.843857	PF3D7 0710300 ()	0.1673
Brazil vs Zambia	7	474754	A	G	0.7522	RAD14 (PF3D7 0710400)	0.1999
Brazil vs Zambia	7	620660	T	A	0.752456	PF3D7 0713600 (PF3D7 0713600)	0.2945
Brazil vs Zambia	7	866181	A	G	0.955862	PF3D7 0719900 (PF3D7 0719900)	0.09178
Brazil vs Zambia	7	1149505	C	T	0.795678	VPS53 (PF3D7 0727000)	0.3538
Brazil vs Zambia	8	672242	T	A	0.795376	ABCF1 (PF3D7 0813700)	0.47
Brazil vs Zambia	8	752747	A	G	0.866535	PF3D7 0816300 (PF3D7 0816300)	0.1372
Brazil vs Zambia	8	812561	G	A	0.902923	RON5 ()	0.4888
Brazil vs Zambia	8	812570	C	T	0.922602	RON5 ()	0.4889
Brazil vs Zambia	8	812667	G	A	0.883552	RON5 (PF3D7 0817700)	0.4691
Brazil vs Zambia	8	845787	T	A	0.770138	PBLP (PF3D7 0818600)	0.2441
Brazil vs Zambia	8	861388	A	G	0.77791	HSP70 (PF3D7 0818900)	0.4176
Brazil vs Zambia	8	882476	A	G	0.940919	PF3D7 0819500 ()	0.09139
Brazil vs Zambia	8	1005851	G	C	0.90902	PF3D7 0822800 (PF3D7 0822800)	0.4911
Brazil vs Zambia	9	127644	G	A	0.787015	PF3D7 0902900 (PF3D7 0902900)	0.3612
Brazil vs Zambia	9	231065	C	A	0.817289	CuTP (PF3D7 0904900)	0.2482
Brazil vs Zambia	9	290285	C	T	0.814192	PF3D7 0905800 (PF3D7 0905800)	0.4622
Brazil vs Zambia	9	290324	G	A	0.818374	PF3D7 0905800 (PF3D7 0905800)	0.4712
Brazil vs Zambia	9	492627	C	T	0.762279	ALP5a (PF3D7 0910700)	0.3887
Brazil vs Zambia	9	512326	A	C	0.81336	CRMP1 (PF3D7 0911300)	0.4501
Brazil vs Zambia	9	828981	A	G	0.88998	PF3D7 0920200 (PF3D7 0920200)	0.1593
Brazil vs Zambia	9	1084846	A	C	0.789784	PF3D7 0926600 (PF3D7 0926600)	0.23
Brazil vs Zambia	9	1112623	A	G	0.785855	PF3D7 0927200 (PF3D7 0927200)	0.3887
Brazil vs Zambia	9	1178963	G	A	0.83048	RhopH2 (PF3D7 0929400)	0.2924
Brazil vs Zambia	9	1179228	G	A	0.883614	RhopH2 (PF3D7 0929400)	0.374
Brazil vs Zambia	9	1179855	A	C	0.958743	RhopH2 (PF3D7 0929400)	0.3811
Brazil vs Zambia	10	558458	T	G	0.761539	PF3D7 1014100 (PF3D7 1014100)	0.4827
Brazil vs Zambia	10	662320	T	C	0.834971	PF3D7 1016500 (PF3D7 1016500)	0.3245
Brazil vs Zambia	10	663646	T	C	0.925005	PF3D7 1016500 (PF3D7 1016500)	0.1059
Brazil vs Zambia	10	1181683	T	C	0.825676	MTRAP (PF3D7 1028700)	0.468
Brazil vs Zambia	10	1391602	A	C	0.926073	PF3D7 1035100 (PF3D7 1035100)	0.0782
Brazil vs Zambia	11	307361	G	A	0.888016	PAIP1 (PF3D7 1107300)	0.1506
Brazil vs Zambia	11	360271	C	T	0.79802	PF3D7 1108100 ()	0.1881
Brazil vs Zambia	11	638299	T	G	0.964848	HSP101 (PF3D7 1116800)	0.4931
Brazil vs Zambia	11	828596	T	C	0.913556	PF3D7 1121800 (PF3D7 1121800)	0.3175
Brazil vs Zambia	12	49704	A	T	0.841949	VAR2CSA (PF3D7 1200600)	0.1717
Brazil vs Zambia	12	63393	G	A	0.757479	ACS7 (PF3D7 1200700)	0.1907
Brazil vs Zambia	12	1114059	T	C	0.837194	CYC2 (PF3D7 1227500)	0.4993
Brazil vs Zambia	12	1229032	T	C	0.774067	PF3D7 1229900 (PF3D7 1229900)	0.3583
Brazil vs Zambia	12	2151902	T	C	0.756385	PF3D7 1252600 (PF3D7 1252600)	0.4582
Brazil vs Zambia	12	2171632	G	A	0.751888	PF3D7 1253100 (PF3D7 1253100)	0.4202
Brazil vs Zambia	12	2171640	G	C	0.754429	PF3D7 1253100 (PF3D7 1253100)	0.4213
Brazil vs Zambia	12	2171647	G	A	0.764492	PF3D7 1253100 (PF3D7 1253100)	0.4327
Brazil vs Zambia	12	2171702	G	T	0.810563	PF3D7 1253100 (PF3D7 1253100)	0.436
Brazil vs Zambia	13	266967	T	C	0.778838	PF3D7 1305300 (PF3D7 1305300)	0.2402
Brazil vs Zambia	13	366999	G	T	0.833006	cpsSII (PF3D7 1308200)	0.1949
Brazil vs Zambia	13	445694	C	T	0.750491	PF3D7 1309800 (PF3D7 1309800)	0.2115
Brazil vs Zambia	13	576501	C	T	0.825147	PF3D7 1313500 (PF3D7 1313500)	0.4732
Brazil vs Zambia	13	1697887	T	C	0.79674	PMT (PF3D7 1343000)	0.4451
Brazil vs Zambia	13	1879453	T	A	0.771635	P47 (PF3D7 1346800)	0.3506
Brazil vs Zambia	13	1879488	G	A	0.982906	P47 (PF3D7 1346800)	0.4924
Brazil vs Zambia	13	2422766	A	G	0.774067	GCbeta (PF3D7 1360500)	0.1615
Brazil vs Zambia	13	2479113	C	G	0.960707	PF3D7 1361800 (PF3D7 1361800)	0.3359
Brazil vs Zambia	14	1665655	G	T	0.897839	PF3D7 1440800 (PF3D7 1440800)	0.2395
Brazil vs Zambia	14	1710253	A	T	0.802381	PF3D7 1442200 (PF3D7 1442200)	0.1109
Brazil vs Zambia	14	1770207	T	C	0.862475	PF3D7 1443100 (PF3D7 1443100)	0.1937
Brazil vs Zambia	14	2185421	G	T	0.895771	PF3D7 1453200 (PF3D7 1453200)	0.3849
Brazil vs Zambia	14	2695875	T	C	0.759848	PF3D7 1466200 (PF3D7 1466200)	0.4575
Brazil vs Zambia	14	3126183	T	C	0.956778	PF3D7 1475900 (PF3D7 1475900)	0.1439
Burkina Faso vs Bangladesh	2	109634	G	C	0.897168	LSAP2 (PF3D7 0202100)	0.3728
Burkina Faso vs Bangladesh	2	109659	T	C	0.825278	LSAP2 (PF3D7 0202100)	0.3602
Burkina Faso vs Bangladesh	3	622763	G	C	0.779213	CTRP (PF3D7 0315200)	0.4009
Burkina Faso vs Bangladesh	3	851156	C	T	0.8277	Cap380 (PF3D7 0320400)	0.4239
Burkina Faso vs Bangladesh	4	329468	A	T	0.769519	Pfs16 (PF3D7 0406200)	0.4913
[truncated: 40,278 more rows]

## Sheet: Table S8
Supplementary Table 8. Single nucleotide polymorphisms with moderate-high FST (>0.75) for each region ("one-against-all") (MAF>0.1)
Region	Chromosome	Position	Reference Allele	Alternative Allele	FST	Gene	Overall MAF
Oceania	4	748239	A	T	0.805539	DHFR-TS (PF3D7_0417200)	0.21
Oceania	7	435413	C	T	0.766706	PF3D7_0709700 (PF3D7_0709700)	0.02794
Oceania	8	1002018	T	C	0.783393	PF3D7_0822700 (PF3D7_0822700)	0.2002
South_America	4	677644	A	G	0.815741	PF3D7_0415200 (PF3D7_0415200)	0.115
South_America	4	683888	G	A	0.77841	CRK3 (PF3D7_0415300)	0.1523
South_America	4	748262	T	C	0.898449	DHFR-TS (PF3D7_0417200)	0.1808
South_America	4	797761	A	C	0.763417	PF3D7_0418000 (PF3D7_0418000)	0.2948
South_America	5	966314	C	A	0.776128	PF3D7_0523200 (PF3D7_0523200)	0.163
South_America	5	1043303	G	A	0.785491	ACS10 (PF3D7_0525100)	0.2836
South_America	6	1224777	T	A	0.828663	SET1 (PF3D7_0629700)	0.2436
South_America	7	620660	T	A	0.773479	PF3D7_0713600 (PF3D7_0713600)	0.2945
South_America	7	866181	A	G	0.791549	PF3D7_0719900 (PF3D7_0719900)	0.09178
South_America	8	489611	A	T	0.790092	PF3D7_0809600 (PF3D7_0809600)	0.2728
South_America	9	1084846	A	C	0.760587	PF3D7_0926600 (PF3D7_0926600)	0.23
South_America	11	307361	G	A	0.822157	PAIP1 (PF3D7_1107300)	0.1506
South_America	13	2422766	A	G	0.897739	GCbeta (PF3D7_1360500)	0.1615
South_America	14	41328	A	T	0.79085	PF3D7_1401100 (PF3D7_1401100)	0.1218
South_America	14	420628	A	G	0.840185	RAP1 (PF3D7_1410400)	0.1839
South_America	14	1665655	G	T	0.834461	PF3D7_1440800 (PF3D7_1440800)	0.2395
South_America	14	1710253	A	T	0.808752	PF3D7_1442200 (PF3D7_1442200)	0.1109
Southeast_Asia	9	1406576	G	A	0.780806	GIG (PF3D7_0935600)	0.4711
West_Africa	8	585841	C	G	0.781782	PF3D7_0811600 (PF3D7_0811600)	0.4498
West_Africa	8	585854	A	C	0.867319	PF3D7_0811600 (PF3D7_0811600)	0.4093
West_Africa	9	1179855	A	C	0.860647	RhopH2 (PF3D7_0929400)	0.3811
West_Africa	11	638299	T	G	0.759963	HSP101 (PF3D7_1116800)	0.4931
West_Africa	11	1375988	T	C	0.785688	PPM8 (PF3D7_1135100)	0.4143
West_Africa	13	1879488	G	A	0.76307	P47 (PF3D7_1346800)	0.4924
West_Africa	13	2124825	T	A	0.754238	PF3D7_1353100 (PF3D7_1353100)	0.28
West_Africa	13	2481108	C	G	0.880573	PF3D7_1361800 (PF3D7_1361800)	0.3507
West_Africa	14	161286	G	T	0.773803	PF3D7_1404700 (PF3D7_1404700)	0.347
MAF= Minor Allele Frequency

## Sheet: Table S9
Supplementary Table 9. Single nucleotide polymorphisms with moderate-high FST (>0.75) for each country ("one-against-all") (MAF>0.1)
Country	Chromosome	Position	Reference Allele	Alternative Allele	FST	Gene	Overall MAF
Brazil	1	495385	A	G	0.754849	SURF1.1 (PF3D7_0113100)	0.2478
Brazil	1	495388	A	G	0.754835	SURF1.1 (PF3D7_0113100)	0.2478
Brazil	1	499681	A	T	0.794248	SURF1.1 (PF3D7_0113100)	0.1452
Brazil	1	499684	T	G	0.781449	SURF1.1 (PF3D7_0113100)	0.1569
Brazil	1	543381	G	A	0.920301	EPF1 (PF3D7_0114000)	0.04504
Brazil	2	339959	C	T	0.780918	PF3D7_0208300 (PF3D7_0208300)	0.2218
Brazil	3	890846	C	T	0.964503	PF3D7_0321300 (PF3D7_0321300)	0.03884
Brazil	4	236244	C	T	0.761583	PF3D7_0404300 (PF3D7_0404300)	0.09705
Brazil	4	677644	A	G	0.888142	PF3D7_0415200 (PF3D7_0415200)	0.115
Brazil	4	683888	G	A	0.850752	CRK3 (PF3D7_0415300)	0.1523
Brazil	4	748262	T	C	0.82198	DHFR-TS (PF3D7_0417200)	0.1808
Brazil	4	839310	A	G	0.782447	PF3D7_0418600 (PF3D7_0418600)	0.2204
Brazil	4	1121457	C	G	0.867397	FIKK4.2 (PF3D7_0424700)	0.1356
Brazil	4	1121472	T	A	0.877579	FIKK4.2 (PF3D7_0424700)	0.1255
Brazil	4	1122147	A	C	0.843559	FIKK4.2 (PF3D7_0424700)	0.1593
Brazil	5	949158	A	G	0.773853	PF3D7_0522900 (PF3D7_0522900)	0.2287
Brazil	5	966314	C	A	0.839952	PF3D7_0523200 (PF3D7_0523200)	0.163
Brazil	6	482969	G	A	0.86235	PF3D7_0611500 (PF3D7_0611500)	0.1406
Brazil	6	1224777	T	A	0.759097	SET1 (PF3D7_0629700)	0.2436
Brazil	7	383527	T	C	0.818103	HSP90	0.1849
Brazil	7	473039	A	T	0.781564	PF3D7_0710300	0.1983
Brazil	7	473203	G	A	0.789606	PF3D7_0710300 (PF3D7_0710300)	0.1905
Brazil	7	473334	A	T	0.826407	PF3D7_0710300	0.155
Brazil	7	473404	T	A	0.813624	PF3D7_0710300	0.1673
Brazil	7	474754	A	G	0.779863	RAD14 (PF3D7_0710400)	0.1999
Brazil	7	866181	A	G	0.890372	PF3D7_0719900 (PF3D7_0719900)	0.09178
Brazil	8	752747	A	G	0.821552	PF3D7_0816300 (PF3D7_0816300)	0.1372
Brazil	8	845787	T	A	0.758555	PBLP (PF3D7_0818600)	0.2441
Brazil	8	882476	A	G	0.911825	PF3D7_0819500	0.09139
Brazil	9	231065	C	A	0.754432	CuTP (PF3D7_0904900)	0.2482
Brazil	9	828981	A	G	0.843633	PF3D7_0920200 (PF3D7_0920200)	0.1593
Brazil	9	1084846	A	C	0.772656	PF3D7_0926600 (PF3D7_0926600)	0.23
Brazil	10	663646	T	C	0.875206	PF3D7_1016500 (PF3D7_1016500)	0.1059
Brazil	10	1391602	A	C	0.883289	PF3D7_1035100 (PF3D7_1035100)	0.0782
Brazil	11	307361	G	A	0.852315	PAIP1 (PF3D7_1107300)	0.1506
Brazil	11	360271	C	T	0.814667	PF3D7_1108100	0.1881
Brazil	12	49704	A	T	0.807105	VAR2CSA (PF3D7_1200600)	0.1717
Brazil	12	52935	T	G	0.819533	VAR2CSA (PF3D7_1200600)	0.1835
Brazil	12	63393	G	A	0.788611	ACS7 (PF3D7_1200700)	0.1907
Brazil	12	907264	A	G	0.833433	AP2-G (PF3D7_1222600)	0.1695
Brazil	13	366999	G	T	0.807991	cpsSII (PF3D7_1308200)	0.1949
Brazil	13	445694	C	T	0.791312	PF3D7_1309800 (PF3D7_1309800)	0.2115
Brazil	13	614769	T	A	0.758775	TERT (PF3D7_1314200)	0.1974
Brazil	13	2422766	A	G	0.841448	GCbeta (PF3D7_1360500)	0.1615
Brazil	14	420628	A	G	0.818845	RAP1 (PF3D7_1410400)	0.1839
Brazil	14	1665655	G	T	0.7631	PF3D7_1440800 (PF3D7_1440800)	0.2395
Brazil	14	1710253	A	T	0.769949	PF3D7_1442200 (PF3D7_1442200)	0.1109
Brazil	14	1770207	T	C	0.809042	PF3D7_1443100 (PF3D7_1443100)	0.1937
Brazil	14	3126183	T	C	0.859115	PF3D7_1475900 (PF3D7_1475900)	0.1439
Colombia	1	531103	T	A	0.762426	PF3D7_0113800 (PF3D7_0113800)	0.1903
Colombia	4	748262	T	C	0.825576	DHFR-TS (PF3D7_0417200)	0.1808
Colombia	4	1034437	A	T	0.806953	BRR2 (PF3D7_0422500)	0.1607
Colombia	5	706173	T	A	0.797892	ApiAP2 (PF3D7_0516800)	0.1881
Colombia	6	1011446	A	T	0.974548	PF3D7_0624800 (PF3D7_0624800)	0.03298
Colombia	6	1040344	G	A	0.839452	PF3D7_0625600 (PF3D7_0625600)	0.1671
Colombia	6	1224777	T	A	0.762347	SET1 (PF3D7_0629700)	0.2436
Colombia	6	1266213	T	A	0.758847	PF3D7_0630300 (PF3D7_0630300)	0.07475
Colombia	6	1266308	A	T	0.902712	PF3D7_0630300 (PF3D7_0630300)	0.1046
Colombia	7	397135	T	C	0.942222	HSP110c (PF3D7_0708800)	0.06523
Colombia	7	415137	C	T	0.827113	CG2 (PF3D7_0709300)	0.1794
Colombia	7	415245	G	A	0.850801	CG2 (PF3D7_0709300)	0.1559
Colombia	7	415250	T	C	0.850403	CG2 (PF3D7_0709300)	0.1563
Colombia	7	433519	A	T	0.921962	POP1 (PF3D7_0709600)	0.08528
Colombia	7	433609	A	T	0.887992	POP1 (PF3D7_0709600)	0.119
Colombia	7	842326	A	T	0.766363	NEK4	0.2185
Colombia	7	1196326	A	T	0.782559	PF3D7_0728100 (PF3D7_0728100)	0.2028
Colombia	9	1084846	A	C	0.765146	PF3D7_0926600 (PF3D7_0926600)	0.23
Colombia	10	1449646	G	A	0.773253	PF3D7_1036800 (PF3D7_1036800)	0.1156
Colombia	13	2257919	C	A	0.881179	ARK3 (PF3D7_1356800)	0.0677
Colombia	14	1665655	G	T	0.766335	PF3D7_1440800 (PF3D7_1440800)	0.2395
Colombia	14	2792758	G	T	0.757891	PF3D7_1468100 (PF3D7_1468100)	0.2371
Ecuador	1	155977	G	A	0.766134	PF3D7_0103500 (PF3D7_0103500)	0.1454
Ecuador	1	155978	C	T	0.766395	PF3D7_0103500 (PF3D7_0103500)	0.1452
Ecuador	1	531103	T	A	0.811714	PF3D7_0113800 (PF3D7_0113800)	0.1903
Ecuador	2	840040	C	A	0.768246	CLAG2 (PF3D7_0220800)	0.2331
Ecuador	3	123737	C	A	0.859106	CLAG3.2 (PF3D7_0302200)	0.141
Ecuador	3	140282	A	T	0.829726	CLAG3.1 (PF3D7_0302500)	0.1713
Ecuador	3	354502	C	T	0.821253	PF3D7_0308000 (PF3D7_0308000)	0.05498
Ecuador	4	748262	T	C	0.820616	DHFR-TS (PF3D7_0417200)	0.1808
Ecuador	4	748410	G	A	0.771066	DHFR-TS (PF3D7_0417200)	0.07098
Ecuador	4	1034437	A	T	0.840699	BRR2 (PF3D7_0422500)	0.1607
Ecuador	5	288839	C	A	0.769684	ROM4 (PF3D7_0506900)	0.2316
Ecuador	5	706173	T	A	0.813331	ApiAP2 (PF3D7_0516800)	0.1881
Ecuador	5	901719	G	T	0.843738	TAF10 (PF3D7_0522200)	0.01777
Ecuador	6	312414	G	C	0.751417	COQ2 (PF3D7_0607500)	0.2499
Ecuador	6	1011446	A	T	0.968685	PF3D7_0624800 (PF3D7_0624800)	0.03298
Ecuador	6	1040344	G	A	0.834319	PF3D7_0625600 (PF3D7_0625600)	0.1671
Ecuador	6	1224777	T	A	0.757656	SET1 (PF3D7_0629700)	0.2436
Ecuador	6	1266213	T	A	0.926801	PF3D7_0630300 (PF3D7_0630300)	0.07475
Ecuador	6	1266308	A	T	0.896842	PF3D7_0630300 (PF3D7_0630300)	0.1046
Ecuador	7	397135	T	C	0.936306	HSP110c (PF3D7_0708800)	0.06523
Ecuador	7	415137	C	T	0.822019	CG2 (PF3D7_0709300)	0.1794
Ecuador	7	415245	G	A	0.845451	CG2 (PF3D7_0709300)	0.1559
Ecuador	7	415250	T	C	0.845057	CG2 (PF3D7_0709300)	0.1563
Ecuador	7	433519	A	T	0.916314	POP1 (PF3D7_0709600)	0.08528
Ecuador	7	433609	A	T	0.882519	POP1 (PF3D7_0709600)	0.119
Ecuador	7	475135	A	G	0.765536	RAD14 (PF3D7_0710400)	0.2358
Ecuador	7	602349	G	A	0.944653	RIF	0.05541
Ecuador	7	622939	G	A	0.910355	PF3D7_0713700	0.0912
Ecuador	7	700840	C	T	0.940451	PF3D7_0715900 (PF3D7_0715900)	0.06115
Ecuador	7	842326	A	T	0.782798	NEK4	0.2185
Ecuador	7	1196326	A	T	0.798381	PF3D7_0728100 (PF3D7_0728100)	0.2028
Ecuador	8	1383582	T	C	0.754961	PF3D7_0832000 (PF3D7_0832000)	0.2451
Ecuador	9	1084846	A	C	0.771062	PF3D7_0926600 (PF3D7_0926600)	0.23
Ecuador	10	1394950	G	A	0.755059	PF3D7_1035200 (PF3D7_1035200)	0.2483
Ecuador	10	1449646	G	A	0.885785	PF3D7_1036800 (PF3D7_1036800)	0.1156
Ecuador	12	550805	T	C	0.778654	PF3D7_1212400 (PF3D7_1212400)	0.1371
Ecuador	12	642179	T	C	0.776337	SR10 (PF3D7_1215900)	0.04208
Ecuador	12	1542404	C	A	0.824594	PF3D7_1237100 (PF3D7_1237100)	0.05956
Ecuador	12	1552084	T	C	0.84829	PF3D7_1237200 (PF3D7_1237200)	0.07051
Ecuador	13	444696	C	A	0.778925	VPS18 (PF3D7_1309700)	0.1342
Ecuador	13	738765	A	T	0.822455	PF3D7_1317700 (PF3D7_1317700)	0.06471
Ecuador	13	1228260	T	A	0.763707	MyoC (PF3D7_1329100)	0.0467
Ecuador	13	1228360	T	A	0.794529	MyoC (PF3D7_1329100)	0.0525
Ecuador	13	1228434	T	G	0.752286	MyoC (PF3D7_1329100)	0.05526
Ecuador	13	1228438	G	A	0.752761	MyoC (PF3D7_1329100)	0.0549
Ecuador	13	2257919	C	A	0.933587	ARK3 (PF3D7_1356800)	0.0677
Ecuador	13	2408374	C	T	0.769631	EMC3 (PF3D7_1360200)	0.07644
Ecuador	14	1665655	G	T	0.761753	PF3D7_1440800 (PF3D7_1440800)	0.2395
Eritrea	7	76807	T	G	0.758403	RIF (PF3D7_0701800)	0.2421
Eritrea	7	76810	A	G	0.759672	RIF (PF3D7_0701800)	0.2409
Eritrea	7	76822	T	C	0.758945	RIF (PF3D7_0701800)	0.2416
Eritrea	7	76867	A	G	0.773485	RIF	0.227
Eritrea	7	76869	A	G	0.773435	RIF	0.227
Eritrea	8	1383582	T	C	0.754961	PF3D7_0832000 (PF3D7_0832000)	0.2451
Eritrea	8	1383603	C	A	0.795262	PF3D7_0832000 (PF3D7_0832000)	0.2049
Ethiopia	9	949454	G	A	0.771724	PLP3 (PF3D7_0923300)	0.0649
French Guiana	4	683888	G	A	0.848739	CRK3 (PF3D7_0415300)	0.1523
French Guiana	4	748262	T	C	0.820194	DHFR-TS (PF3D7_0417200)	0.1808
French Guiana	4	839310	A	G	0.780605	PF3D7_0418600 (PF3D7_0418600)	0.2204
French Guiana	4	1121472	T	A	0.754566	FIKK4.2 (PF3D7_0424700)	0.1255
French Guiana	5	949158	A	G	0.77222	PF3D7_0522900 (PF3D7_0522900)	0.2287
French Guiana	5	966314	C	A	0.837975	PF3D7_0523200 (PF3D7_0523200)	0.163
French Guiana	6	482969	G	A	0.860418	PF3D7_0611500 (PF3D7_0611500)	0.1406
French Guiana	6	1224777	T	A	0.757351	SET1 (PF3D7_0629700)	0.2436
French Guiana	7	383527	T	C	0.816157	HSP90	0.1849
French Guiana	7	866181	A	G	0.848833	PF3D7_0719900 (PF3D7_0719900)	0.09178
French Guiana	9	1084846	A	C	0.770885	PF3D7_0926600 (PF3D7_0926600)	0.23
French Guiana	11	284399	T	A	0.763312	PF3D7_1106800 (PF3D7_1106800)	0.2376
French Guiana	11	307361	G	A	0.850369	PAIP1 (PF3D7_1107300)	0.1506
French Guiana	13	445694	C	T	0.789445	PF3D7_1309800 (PF3D7_1309800)	0.2115
French Guiana	13	2422766	A	G	0.839406	GCbeta (PF3D7_1360500)	0.1615
French Guiana	14	41328	A	T	0.818924	PF3D7_1401100 (PF3D7_1401100)	0.1218
French Guiana	14	420628	A	G	0.816968	RAP1 (PF3D7_1410400)	0.1839
French Guiana	14	1665655	G	T	0.761363	PF3D7_1440800 (PF3D7_1440800)	0.2395
Guyana	2	468251	G	A	0.799279	PF3D7_0211600 (PF3D7_0211600)	0.2581
Guyana	3	273124	T	C	0.808525	PF3D7_0305500 (PF3D7_0305500)	0.2185
Guyana	3	849476	C	T	0.751928	Cap380 (PF3D7_0320400)	0.2944
Guyana	4	677644	A	G	0.940801	PF3D7_0415200 (PF3D7_0415200)	0.115
Guyana	4	683888	G	A	0.910763	CRK3 (PF3D7_0415300)	0.1523
Guyana	4	691961	C	T	0.758373	PF3D7_0415700 (PF3D7_0415700)	0.2948
Guyana	4	748262	T	C	0.883614	DHFR-TS (PF3D7_0417200)	0.1808
Guyana	4	797761	A	C	0.760625	PF3D7_0418000 (PF3D7_0418000)	0.2948
Guyana	4	839310	A	G	0.838426	PF3D7_0418600 (PF3D7_0418600)	0.2204
Guyana	5	908826	G	A	0.766059	PF3D7_0522400 (PF3D7_0522400)	0.2865
Guyana	5	929884	A	G	0.757896	PF3D7_0522400 (PF3D7_0522400)	0.2951
Guyana	5	949158	A	G	0.832007	PF3D7_0522900 (PF3D7_0522900)	0.2287
Guyana	5	966314	C	A	0.903419	PF3D7_0523200 (PF3D7_0523200)	0.163
Guyana	5	1042561	T	G	0.755844	ACS10 (PF3D7_0525100)	0.2959
Guyana	5	1043303	G	A	0.772344	ACS10 (PF3D7_0525100)	0.2836
Guyana	6	482969	G	A	0.853961	PF3D7_0611500 (PF3D7_0611500)	0.1406
Guyana	6	1224777	T	A	0.814926	SET1 (PF3D7_0629700)	0.2436
Guyana	7	378669	G	A	0.794912	BUD32 (PF3D7_0708300)	0.2633
Guyana	7	383527	T	C	0.881267	HSP90	0.1849
Guyana	7	403337	G	T	0.753076	CRT	0.3022
Guyana	7	419603	T	A	0.75483	CG2 (PF3D7_0709300)	0.299
Guyana	7	451640	T	G	0.790544	PF3D7_0710000 (PF3D7_0710000)	0.2668
Guyana	7	620660	T	A	0.76068	PF3D7_0713600 (PF3D7_0713600)	0.2945
Guyana	7	866181	A	G	0.895084	PF3D7_0719900 (PF3D7_0719900)	0.09178
Guyana	8	489611	A	T	0.784585	PF3D7_0809600 (PF3D7_0809600)	0.2728
Guyana	8	492502	T	A	0.779871	PF3D7_0809600 (PF3D7_0809600)	0.2773
Guyana	9	231065	C	A	0.808785	CuTP (PF3D7_0904900)	0.2482
Guyana	9	381019	A	G	0.789181	PF3D7_0908200 (PF3D7_0908200)	0.1156
Guyana	9	828981	A	G	0.77374	PF3D7_0920200 (PF3D7_0920200)	0.1593
Guyana	10	817457	C	T	0.794632	PF3D7_1020200 (PF3D7_1020200)	0.2634
Guyana	11	284399	T	A	0.821888	PF3D7_1106800 (PF3D7_1106800)	0.2376
Guyana	11	307361	G	A	0.915339	PAIP1 (PF3D7_1107300)	0.1506
Guyana	11	360271	C	T	0.844277	PF3D7_1108100	0.1881
Guyana	13	366999	G	T	0.865732	cpsSII (PF3D7_1308200)	0.1949
Guyana	13	445694	C	T	0.849639	PF3D7_1309800 (PF3D7_1309800)	0.2115
Guyana	13	2422766	A	G	0.903468	GCbeta (PF3D7_1360500)	0.1615
Guyana	14	41328	A	T	0.896947	PF3D7_1401100 (PF3D7_1401100)	0.1218
Guyana	14	420628	A	G	0.879135	RAP1 (PF3D7_1410400)	0.1839
Guyana	14	673692	T	C	0.816042	PF3D7_1416600 (PF3D7_1416600)	0.1089
Guyana	14	1307328	A	G	0.754584	PF3D7_1433200 (PF3D7_1433200)	0.2984
Guyana	14	1665655	G	T	0.820639	PF3D7_1440800 (PF3D7_1440800)	0.2395
Guyana	14	1710253	A	T	0.920232	PF3D7_1442200 (PF3D7_1442200)	0.1109
Guyana	14	1770207	T	C	0.819304	PF3D7_1443100 (PF3D7_1443100)	0.1937
Guyana	14	3017880	T	C	0.840638	PF3D7_1474000 (PF3D7_1474000)	0.1069
Indonesia	4	748239	A	T	0.795521	DHFR-TS (PF3D7_0417200)	0.21
Indonesia	7	435413	C	T	0.766936	PF3D7_0709700 (PF3D7_0709700)	0.02794
Indonesia	8	1002018	T	C	0.805411	PF3D7_0822700 (PF3D7_0822700)	0.2002
Indonesia	10	658468	C	T	0.776811	FIKK10.1 (PF3D7_1016400)	0.2286
Papua New Guinea	4	748239	A	T	0.799849	DHFR-TS (PF3D7_0417200)	0.21
Papua New Guinea	7	435413	C	T	0.750498	PF3D7_0709700 (PF3D7_0709700)	0.02794
Papua New Guinea	8	1002018	T	C	0.759701	PF3D7_0822700 (PF3D7_0822700)	0.2002
Peru	3	897781	T	A	0.791561	PF3D7_0321500 (PF3D7_0321500)	0.1468
Peru	4	748262	T	C	0.820194	DHFR-TS (PF3D7_0417200)	0.1808
Peru	4	1121457	C	G	0.86545	FIKK4.2 (PF3D7_0424700)	0.1356
Peru	4	1121472	T	A	0.875558	FIKK4.2 (PF3D7_0424700)	0.1255
Peru	4	1122147	A	C	0.841676	FIKK4.2 (PF3D7_0424700)	0.1593
Peru	5	706173	T	A	0.812912	ApiAP2 (PF3D7_0516800)	0.1881
Peru	6	240510	T	C	0.788235	RAD50 (PF3D7_0605800)	0.09709
Peru	6	1224777	T	A	0.757351	SET1 (PF3D7_0629700)	0.2436
Peru	8	1190721	C	A	0.789978	PF3D7_0827600 (PF3D7_0827600)	0.09563
Peru	10	1391523	G	T	0.787599	PF3D7_1035100 (PF3D7_1035100)	0.2134
Peru	10	1394950	G	A	0.755486	PF3D7_1035200 (PF3D7_1035200)	0.2483
Peru	11	284399	T	A	0.763357	PF3D7_1106800 (PF3D7_1106800)	0.2376
Peru	13	445694	C	T	0.78949	PF3D7_1309800 (PF3D7_1309800)	0.2115
Peru	13	2422766	A	G	0.839503	GCbeta (PF3D7_1360500)	0.1615
Peru	14	1665655	G	T	0.761363	PF3D7_1440800 (PF3D7_1440800)	0.2395
MAF= Minor Allele Frequency

[truncated: 11 more sheets: Table S10, Table S11, Table S12, Table S13, Table S14, Table S15, Table S16, Table S17, Table S18, Table S19, Sheet3]
